# Supplementary material for: Clinical, serological and epidemiological features of hepatitis A in León, Nicaragua
Source: PeerJ. 2021 Jun 21;9:e11516. doi: 10.7717/peerj.11516 (PMC8223896; doi:10.7717/peerj.11516)
Supplement: Supplemental Information 1 — The workbook contains five worksheets: (1) Description; (2) ‘alldata’, containing the full dataset; (3, 4, 5) worksheets ‘table1’, ‘table2’ and ‘table3’ containing the raw data used to generate the corresponding table. [file peerj-09-11516-s001.xlsx]

## Sheet: description
The workbook contains five worksheets
The first worksheet 'alldata' contains the full dataset and the worksheets 'table1'-'table3' contain the raw data used to generate the corresponding table
Variable names in the first row are brief descriptions that can be easily mapped to the variables in the tables and in the text
We used Statistical Software R version 4.0.3 to export the data and for all data analyses

## Sheet: alldata
uniqueID	visit_date	sex	age	housing	toilets	water	hepA_yn	anti_hav_concentration_iu	anti_hav_concentration_iu_numeric	anti_hav_seroprotection_yn	time_btw_symptom_visit_days	time_btw_symptom_visit_days_cat	jaundice	pale_stool	dark_urin	nausea	vomiting	fever	anorexic	malaise	bloodtransfusion	got_cat	gpt_cat	bt_cat
66167	2007-10-10	female	6.29	crowding	outside	inside	Hep A	9401	9401	yes	20	>11	yes	no	no	yes	yes	yes	yes	yes	no	normal	normal	normal
47369	2009-05-13	female	6.43	no crowding	outside	outside	no Hep A				4	[0,5]	yes	no	no	yes	yes	yes	yes	yes	no	normal	normal	normal
41400	2009-08-11	female	9.37	no crowding	inside	inside	no Hep A				2	[0,5]	yes	yes	no	yes	yes	yes	yes	yes	no	normal	normal	elevated
40330	2009-03-24	female	7.78	crowding	outside	outside	no Hep A				32	>11	no	yes	yes	no	yes	yes	yes	yes	yes	normal	normal	elevated
63383	2009-06-04	female	3.59	no crowding	inside	inside	Hep A				5	[0,5]	yes	yes	yes	yes	yes	yes	yes	yes	no	normal	normal	normal
40463	2009-10-21	female	74.33	no crowding	inside	inside	no Hep A				0	[0,5]	no	no	no	no	no	no	no	no	no	normal	normal	normal
60017	2006-07-03	female	20.01	no crowding	inside	inside	no Hep A	15720	15720	yes	2	[0,5]	yes	no	no	yes	no	no	yes	yes	no	normal	normal	normal
66256	2008-07-31	female	2.4	no crowding	outside	inside	no Hep A	18680	18680	yes	6	(5,11]	yes	no	yes	no	no	yes	yes	yes	no	normal	normal	normal
40429	2009-09-09	female	7.23	no crowding	outside	inside	no Hep A				29	>11	yes	no	no	yes	yes	yes	yes	yes	no	normal	normal	normal
63250	2008-07-10	female	46.9	no crowding	inside	inside	no Hep A	3847	3847	yes	20	>11	no	no	no	yes	no	no	no	yes	no	normal	normal	normal
42444	2009-09-22	female	46.85	no crowding	inside	inside	no Hep A				10	(5,11]	no	no	no	yes	no	yes	yes	yes	no	normal	normal	normal
60360	2009-05-08	female	5.64	no crowding	inside	inside	no Hep A				3	[0,5]	no	no	no	no	no	yes	no	yes	no	normal	normal	normal
63223	2008-04-03	female	39.38	no crowding	inside	inside	no Hep A	7551	7551	yes	8	(5,11]	yes	no	no	yes	no	no	yes	yes	no	normal	elevated	normal
50010	2006-06-21	female	7.82	no crowding	outside	outside	no Hep A	18220	18220	yes	5	[0,5]	no	no	yes	yes	yes	yes	yes	yes	no	normal	normal	normal
40132	2007-04-26	female	29.44	no crowding	inside	inside	no Hep A	7996	7996	yes	11	(5,11]	no	no	no	yes	no	no	no	no	no	normal	normal	normal
54077	2006-11-20	female	11.42	no crowding	outside	inside	no Hep A	989	989	yes	9	(5,11]	yes	no	no	yes	yes	no	yes	yes	no	normal	normal	normal
44007	2006-05-19	female	20.73	no crowding	outside	outside	no Hep A	28970	28970	yes	11	(5,11]	yes	no	no	yes	no	yes	yes	yes	no	normal	normal	elevated
60533	2010-02-16	female	21.98	no crowding	inside	inside	no Hep A				2	[0,5]	no	no	no	yes	yes	no	no	no	no	normal	normal	normal
63074	2006-11-10	female	19.14	no crowding	inside	inside	no Hep A	1200	1200	yes	2	[0,5]	no	no	no	yes	no	yes	no	yes	no	normal	normal	normal
51009	2006-06-20	female	11.45	crowding	outside	inside	Hep A	59020	59020	yes	10	(5,11]	yes	no	yes	yes	yes	yes	yes	yes	no	normal	normal	normal
60521	2010-01-28	female	56.19	no crowding	inside	inside	no Hep A				4	[0,5]	no	no	no	no	no	no	no	no	no	normal	elevated	normal
61026	2006-08-07	female	3	crowding	inside	outside	Hep A	76320	76320	yes	38	>11	yes	yes	yes	yes	yes	yes	yes	yes	no	normal	normal	normal
610108	2007-03-09	female	30.19	crowding	outside	outside	no Hep A	8043	8043	yes	8	(5,11]	yes	no	no	yes	yes	no	no	yes	no	normal	normal	normal
60198	2008-01-09	female	71.76	no crowding	inside	inside	no Hep A	24450	24450	yes	8	(5,11]	no	yes	no	no	no	no	no	no	no	normal	normal	elevated
43294	2008-10-28	female	2.41	crowding	outside	inside	no Hep A				4	[0,5]	yes	no	yes	yes	no	no	yes	yes	no	normal	normal	elevated
41519	2010-01-29	female	33.14	no crowding	inside	inside	no Hep A				3	[0,5]	yes	no	no	no	no	no	yes	no	no	normal	normal	normal
63003	2006-02-21	female	3.27	no crowding	inside	inside	no Hep A	13960	13960	yes	32	>11	yes	no	no	yes	yes	yes	no	yes	no	normal	normal	normal
43206	2008-02-05	female	22.07	no crowding	inside	inside	no Hep A	8699	8699	yes			yes	no	no	yes	yes	yes	yes	yes	no	normal	normal	normal
43155	2007-09-12	female	5.3	crowding	inside	inside	no Hep A	74570	74570	yes	6	(5,11]	yes	no	yes	yes	yes	yes	yes	no	no	normal	normal	normal
43189	2007-11-12	female	16.93	no crowding	inside	inside	no Hep A	12760	12760	yes	7	(5,11]	yes	no	no	no	no	yes	no	yes	no	normal	normal	normal
60060	2006-10-06	female	24.85	crowding	inside	inside	no Hep A	18200	18200	yes	66	>11	yes	no	no	yes	no	yes	no	yes	no	normal	normal	normal
61034	2006-08-11	female	31.32	crowding	outside	outside	no Hep A	9000	9000	yes	2	[0,5]	yes	no	no	no	yes	no	yes	yes	no	normal	normal	normal
66441	2009-09-22	female	5.87	no crowding	inside	inside	Hep A				5	[0,5]	yes	no	no	yes	yes	yes	yes	yes	no	normal	elevated	elevated
50193	2007-11-07	female	14.53	no crowding	inside	inside	no Hep A	25930	25930	yes	0	[0,5]	yes	no	yes	yes	yes	yes	yes	yes	no	normal	normal	normal
69511	2010-01-22	female	3.53	no crowding	outside	outside	no Hep A				2	[0,5]	yes	no	no	yes	yes	yes	yes	yes	no	normal	normal	normal
40257	2008-08-01	female	7.5	no crowding	outside	inside	Hep A	8332	8332	yes	9	(5,11]	yes	no	yes	yes	yes	no	yes	yes	no	normal	elevated	elevated
40140	2007-06-11	female	26.14	no crowding	inside	inside	no Hep A	26440	26440	yes	3	[0,5]	no	no	no	yes	no	no	yes	yes	no	normal	normal	normal
60465	2009-10-22	female	24.47	no crowding	inside	inside	no Hep A				1	[0,5]	yes	no	no	yes	yes	yes	no	yes	no	normal	normal	normal
60437	2009-09-18	female	13.2	no crowding	inside	inside	no Hep A				2	[0,5]	yes	no	no	yes	yes	yes	yes	yes	yes	normal	normal	elevated
61036	2006-08-14	female	37.25	no crowding	inside	inside	Hep A	66090	66090	yes	6	(5,11]	yes	no	yes	yes	no	yes	yes	yes	no	normal	normal	normal
66163	2007-10-03	female	9.07	no crowding	inside	inside	no Hep A	53960	53960	yes	23	>11	yes	yes	no	no	yes	yes	yes	yes	no	normal	normal	normal
66249	2008-07-09	female	8.18	no crowding	outside	inside	no Hep A	9719	9719	yes	4	[0,5]	no	no	yes	yes	yes	yes	yes	yes	no	normal	normal	normal
40279	2008-10-07	female	26.89	no crowding	outside	outside	no Hep A				61	>11	no	no	no	no	no	no	no	no	no	normal	normal	elevated
50061	2006-10-13	female	6.78	crowding	inside	inside	no Hep A	17540	17540	yes	4	[0,5]	yes	no	no	yes	no	yes	yes	yes	no	normal	normal	normal
40498	2010-01-14	female	35.51	no crowding	inside	inside	no Hep A				3	[0,5]	yes	no	no	no	no	no	yes	yes	no	normal	normal	normal
60536	2010-02-25	female	11.1	no crowding	inside	inside	no Hep A				16	>11	no	no	no	no	yes	yes	yes	yes	no	normal	normal	normal
41339	2009-03-26	female	9.29	crowding	outside	inside	no Hep A				11	(5,11]	yes	yes	yes	yes	yes	yes	yes	yes	yes	normal	normal	elevated
66195	2007-12-03	female	9.68	no crowding	inside	inside	no Hep A	5838	5838	yes	14	>11	yes	no	no	yes	yes	no	yes	yes	no	normal	normal	normal
60362	2009-05-01	female	9.59	crowding	outside	inside	Hep A						yes	no	yes	yes	no	yes	yes	yes	no	normal	normal	elevated
66160	2007-10-03	female	7.79	no crowding	inside	inside	Hep A	89770	89770	yes	24	>11	yes	yes	yes	yes	no	yes	no	no	no	normal	normal	normal
50240	2008-05-28	female	27.44	no crowding	inside	inside	no Hep A	8863	8863	yes	3	[0,5]	yes	no	no	yes	yes	no	yes	yes	no	normal	normal	elevated
64147	2007-05-31	female	0.35	no crowding	outside	outside	no Hep A	258	258	yes	41	>11	yes	no	yes	no	no	yes	no	yes	no	normal	normal	normal
41321	2009-02-20	female	4.41	no crowding	inside	inside	no Hep A				3	[0,5]	yes	no	no	yes	yes	yes	yes	yes	no	normal	normal	normal
66168	2007-10-10	female	7.42	crowding	outside	inside	no Hep A	< 10	5	no	15	>11	yes	no	no	yes	no	yes	yes	yes	no	normal	normal	elevated
6018	2009-08-28	female	10.28	no crowding	inside	inside	no Hep A				5	[0,5]	yes	yes	yes	no	yes	yes	yes	yes	no	normal	normal	elevated
52342	2009-03-26	female	1.05	crowding	outside	inside	no Hep A				5	[0,5]	yes	no	no	yes	no	no	yes	yes	no	normal	normal	elevated
60126	2007-03-24	female	30.93	crowding	outside	outside	no Hep A	5772	5772	yes	4	[0,5]	yes	no	no	yes	no	yes	yes	yes	no	normal	normal	normal
54076	2006-11-20	female	18.33	no crowding	outside	inside	no Hep A	16090	16090	yes	10	(5,11]	yes	no	no	yes	no	yes	no	no	no	normal	normal	normal
62113	2007-03-14	female	51.29	no crowding	inside	inside	no Hep A	1689	1689	yes	2	[0,5]	no	no	no	yes	no	yes	no	yes	no	normal	normal	normal
44006	2006-05-19	female	5.26	no crowding	inside	inside	no Hep A	< 10	5	no	15	>11	no	no	yes	yes	yes	no	yes	yes	no	normal	normal	elevated
47088	2007-02-01	female	42.11	no crowding	outside	inside	no Hep A	34150	34150	yes	3	[0,5]	yes	no	yes	no	no	yes	yes	yes	no	normal	normal	elevated
60514	2010-01-25	female	3.58	no crowding	inside	inside	no Hep A				3	[0,5]	yes	no	no	no	yes	yes	yes	yes	no	normal	normal	normal
43497	2010-01-18	female	6.47	crowding	inside	inside	no Hep A				2	[0,5]	yes	no	no	no	yes	yes	yes	yes	no	normal	normal	normal
40453	2009-10-02	female	0.19	crowding	inside	inside	no Hep A				1	[0,5]	yes	no	no	yes	yes	yes	yes	yes	no	normal	normal	elevated
40229	2008-04-14	female	4.89	no crowding	outside	inside	Hep A	7718	7718	yes	13	>11	yes	yes	yes	yes	yes	yes	yes	yes	no	normal	normal	elevated
43194	2007-11-23	female	76.44	no crowding	inside	inside	no Hep A	602	602	yes	16	>11	yes	no	no	yes	no	yes	yes	yes	no	normal	normal	normal
61027	2006-08-07	female	4.25	crowding	outside	inside	Hep A	51090	51090	yes	12	>11	yes	yes	yes	no	no	yes	no	no	no	normal	normal	elevated
41454	2009-10-02	female	9.3	crowding	inside	inside	Hep A				5	[0,5]	yes	no	no	yes	no	yes	yes	yes	no	normal	normal	normal
60378	2009-06-01	female	22.37	no crowding	inside	inside	no Hep A				7	(5,11]	yes	no	no	yes	no	no	yes	yes	no	normal	normal	elevated
61025	2006-08-07	female	5.59	crowding	outside	outside	no Hep A	82430	82430	yes	7	(5,11]	yes	no	yes	yes	yes	yes	yes	yes	no	normal	normal	normal
60085	2007-01-18	female	12.18	crowding	outside	inside	no Hep A	11830	11830	yes	23	>11	yes	no	no	yes	yes	yes	yes	yes	no	normal	normal	normal
60084	2007-12-12	female	9.58	crowding	outside	inside	Hep A	86500	86500	yes	331	>11	yes	no	no	yes	yes	yes	yes	yes	no	normal	normal	normal
50131	2007-04-26	female	43.69	no crowding	inside	inside	no Hep A	942	942	yes	10	(5,11]	yes	no	no	yes	no	no	no	yes	no	normal	elevated	normal
40204	2008-02-04	female	6.92	crowding	outside	inside	no Hep A	< 10	5	no	20	>11	yes	no	no	no	no	no	no	yes	no	normal	normal	elevated
50023	2006-08-04	female	4.79	no crowding	outside	outside	Hep A	10000	10000	yes	5	[0,5]	yes	no	yes	yes	yes	no	yes	yes	no	elevated	elevated	elevated
60535	2010-02-18	female	11.38	no crowding	outside	outside	Hep A				3	[0,5]	yes	no	yes	no	yes	yes	no	yes	no	elevated	elevated	elevated
68438	2009-09-21	female	5.22	no crowding	outside	outside	Hep A				1	[0,5]	yes	yes	yes	yes	yes	yes	yes	yes	no	elevated	elevated	elevated
50066	2006-10-13	female	6.32	crowding	outside	inside	Hep A	8756	8756	yes	8	(5,11]	yes	no	yes	no	no	yes	yes	yes	no	elevated	elevated	normal
40477	2009-11-03	female	9.65	crowding	outside	inside	Hep A				4	[0,5]	yes	yes	yes	yes	yes	yes	yes	yes	no	elevated	elevated	elevated
50303	2008-11-24	female	4.11	crowding	outside	inside	Hep A				21	>11	yes	no	no	no	no	yes	yes	yes	no	elevated	elevated	elevated
52502	2010-01-18	female	4.54	no crowding	inside	inside	no Hep A				1	[0,5]	yes	no	no	yes	yes	yes	yes	yes	no	elevated	elevated	normal
65158	2007-09-26	female	7.66	crowding	outside	inside	Hep A	8931	8931	yes	4	[0,5]	yes	no	yes	yes	yes	no	yes	yes	no	elevated	elevated	elevated
44527	2010-02-08	female	5.7	no crowding	inside	inside	Hep A				1	[0,5]	yes	yes	yes	yes	yes	yes	yes	yes	no	elevated	elevated	elevated
63235	2008-04-28	female	7.67	no crowding	inside	inside	Hep A	8684	8684	yes	6	(5,11]	yes	no	no	yes	yes	yes	yes	yes	no	elevated	elevated	elevated
64479	2009-11-05	female	9.48	crowding	inside	inside	Hep A				2	[0,5]	yes	no	no	no	no	yes	yes	yes	no	elevated	elevated	elevated
60316	2009-02-12	female	2.04	crowding	inside	inside	Hep A				6	(5,11]	yes	no	no	no	yes	no	no	yes	no	elevated	elevated	elevated
41401	2009-08-11	female	7.24	no crowding	inside	inside	no Hep A				32	>11	yes	no	no	no	yes	yes	yes	yes	no	elevated	elevated	elevated
65412	2009-08-26	female	0.91	no crowding	inside	inside	Hep A				4	[0,5]	yes	no	yes	no	no	no	yes	no	no	elevated	elevated	elevated
43364	2009-05-12	female	6.19	crowding	outside	outside	no Hep A				11	(5,11]	yes	no	yes	no	yes	no	yes	yes	no	elevated	normal	elevated
62492	2009-12-02	female	7.55	crowding	outside	inside	Hep A				1	[0,5]	yes	yes	yes	no	yes	yes	yes	yes	no	elevated	elevated	normal
66221	2008-03-31	female	11.44	no crowding	outside	inside	Hep A	5360	5360	yes	6	(5,11]	yes	no	no	yes	yes	yes	yes	no	no	elevated	elevated	elevated
63096	2007-02-09	female	8.05	no crowding	outside	outside	Hep A	54550	54550	yes	3	[0,5]	yes	no	no	no	no	yes	yes	yes	no	elevated	elevated	elevated
61308	2009-01-22	female	9.22	crowding	outside	outside	Hep A				4	[0,5]	yes	no	yes	yes	yes	yes	yes	yes	no	elevated	elevated	elevated
63106	2007-02-27	female	1	no crowding	inside	inside	no Hep A	< 10	5	no	8	(5,11]	yes	no	no	no	yes	yes	yes	yes	no	elevated	elevated	elevated
51457	2009-10-12	female	3.29	crowding	outside	inside	no Hep A				2	[0,5]	yes	no	no	yes	yes	no	yes	yes	no	elevated	normal	elevated
43117	2007-03-20	female	6.74	no crowding	inside	inside	Hep A	50630	50630	yes	19	>11	yes	no	no	yes	yes	yes	no	yes	no	elevated	elevated	elevated
62157	2007-09-13	female	21.03	no crowding	inside	inside	no Hep A	3529	3529	yes	18	>11	yes	no	yes	no	no	yes	yes	no	no	elevated	elevated	elevated
65504	2010-01-19	female	1.04	crowding	inside	inside	Hep A				5	[0,5]	yes	yes	yes	yes	yes	yes	yes	yes	yes	elevated	elevated	elevated
60114	2007-03-05	female	6.48	no crowding	inside	inside	Hep A	4334	4334	yes			no	no	no	yes	yes	yes	yes	no	no	elevated	elevated	elevated
42201	2008-01-15	female	11.36	no crowding	inside	inside	Hep A	44920	44920	yes	3	[0,5]	yes	no	no	yes	yes	no	yes	no	no	elevated	elevated	elevated
43447	2009-09-25	female	7.37	crowding	outside	inside	no Hep A				2	[0,5]	yes	no	no	yes	yes	no	yes	yes	no	elevated	elevated	normal
44209	2008-02-20	female	8	no crowding	inside	inside	Hep A	5295	5295	yes	13	>11	no	no	no	no	no	yes	no	no	no	elevated	elevated	elevated
51385	2009-06-09	female	11.32	no crowding	inside	inside	no Hep A				4	[0,5]	no	no	no	yes	yes	yes	yes	yes	no	elevated	elevated	elevated
65365	2009-05-12	female	10.44	crowding	inside	inside	no Hep A				4	[0,5]	yes	yes	yes	yes	no	yes	yes	yes	no	elevated	normal	elevated
41347	2009-03-27	female	2.86	no crowding	inside	inside	Hep A				5	[0,5]	yes	no	no	yes	yes	yes	yes	yes	no	elevated	elevated	elevated
52343	2009-03-26	female	6.18	crowding	outside	outside	Hep A				15	>11	yes	yes	yes	yes	no	yes	no	yes	no	elevated	elevated	elevated
66222	2008-04-03	female	6.42	no crowding	outside	inside	Hep A	7602	7602	yes	5	[0,5]	yes	yes	no	yes	yes	yes	yes	yes	no	elevated	elevated	elevated
51404	2009-08-12	female	4.47	crowding	inside	inside	no Hep A				2	[0,5]	yes	yes	yes	yes	yes	yes	yes	yes	no	elevated	elevated	elevated
60553	2010-03-09	female	9.46	crowding	outside	inside	Hep A				2	[0,5]	yes	no	yes	yes	yes	yes	no	yes	no	elevated	elevated	elevated
64045	2006-08-29	female	17	crowding	outside	outside	Hep A	62390	62390	yes	10	(5,11]	yes	no	yes	yes	yes	yes	yes	yes	no	elevated	elevated	elevated
41197	2007-12-10	female	6.49	crowding	inside	inside	Hep A	6614	6614	yes	9	(5,11]	yes	no	no	yes	yes	yes	yes	yes	no	elevated	elevated	normal
41151	2007-07-30	female	8.27	crowding	inside	inside	Hep A	6837	6837	yes	4	[0,5]	yes	no	yes	yes	yes	no	yes	yes	no	elevated	elevated	elevated
60449	2009-09-29	female	1.56	crowding	inside	inside	no Hep A				2	[0,5]	yes	no	no	no	no	yes	yes	yes	no	elevated	elevated	elevated
63091	2007-02-05	female	8.48	crowding	inside	inside	Hep A	8379	8379	yes			yes	yes	yes	yes	yes	yes	yes	yes	no	elevated	elevated	elevated
42531	2010-02-12	female	10.46	crowding	inside	inside	no Hep A				2	[0,5]	yes	yes	yes	yes	yes	yes	yes	yes	no	elevated	elevated	elevated
60538	2010-02-26	female	0.67	crowding	inside	inside	no Hep A				4	[0,5]	yes	no	no	no	yes	yes	yes	yes	no	elevated	elevated	elevated
55388	2009-06-22	female	5.6	crowding	outside	outside	Hep A				3	[0,5]	yes	no	yes	yes	no	yes	yes	yes	no	elevated	elevated	elevated
50298	2008-11-13	female	6.54	crowding	inside	inside	Hep A				5	[0,5]	yes	yes	yes	yes	no	yes	yes	no	no	elevated	elevated	elevated
65187	2007-11-12	female	11.07	crowding	inside	inside	Hep A	5182	5182	yes	6	(5,11]	yes	no	yes	no	yes	yes	no	yes	no	elevated	elevated	elevated
47328	2009-03-18	female	78.6	no crowding	outside	inside	no Hep A				9	(5,11]	yes	no	yes	no	no	yes	no	no	no	elevated	normal	elevated
50038	2006-08-17	female	12.07	crowding	inside	inside	Hep A	8909	8909	yes	3	[0,5]	yes	yes	yes	yes	yes	yes	yes	yes	no	elevated	elevated	elevated
63104	2007-02-23	female	6.23	no crowding	outside	inside	Hep A	6346	6346	yes	11	(5,11]	yes	yes	yes	yes	yes	yes	no	yes	no	elevated	elevated	elevated
67043	2006-08-28	female	5.28	crowding	outside	inside	Hep A	5148	5148	yes	7	(5,11]	yes	no	yes	yes	yes	yes	yes	yes	no	elevated	elevated	normal
41501	2010-01-18	female	10.09	no crowding	inside	inside	no Hep A				3	[0,5]	yes	no	no	yes	no	yes	yes	yes	no	elevated	elevated	elevated
44508	2010-01-21	female	8.93	crowding	outside	inside	no Hep A				5	[0,5]	yes	yes	yes	yes	yes	yes	yes	yes	no	elevated	normal	normal
60374	2009-05-25	female	2.62	no crowding	inside	inside	Hep A				4	[0,5]	yes	no	no	yes	no	no	yes	no	no	elevated	elevated	elevated
47394	2009-07-09	female	7.9	no crowding	outside	inside	no Hep A				9	(5,11]	yes	no	no	yes	yes	yes	yes	yes	no	elevated	elevated	elevated
43190	2007-11-03	female	3.75	crowding	outside	inside	Hep A	6933	6933	yes	0	[0,5]	yes	no	no	yes	yes	yes	yes	yes	no	elevated	elevated	elevated
42133	2007-04-27	female	6.98	no crowding	outside	inside	Hep A	6781	6781	yes	14	>11	yes	no	yes	yes	yes	yes	yes	yes	no	elevated	elevated	elevated
60288	2008-10-24	female	4.61	crowding	inside	inside	Hep A				12	>11	yes	yes	yes	yes	yes	no	yes	yes	no	elevated	elevated	elevated
44368	2009-05-13	female	5.82	no crowding	inside	inside	Hep A				3	[0,5]	yes	no	yes	yes	no	yes	yes	yes	no	elevated	elevated	elevated
61032	2006-08-07	female	6.47	crowding	outside	outside	Hep A	9424	9424	yes	11	(5,11]	yes	no	yes	yes	yes	no	yes	yes	no	elevated	elevated	elevated
60528	2010-02-09	female	5.45	crowding	inside	inside	Hep A				3	[0,5]	yes	no	no	yes	no	yes	yes	yes	no	elevated	elevated	elevated
63424	2009-09-02	female	17.5	no crowding	inside	inside	no Hep A				5	[0,5]	no	no	no	yes	no	yes	yes	yes	no	elevated	elevated	elevated
40273	2008-09-17	female	5.87	crowding	inside	inside	no Hep A				15	>11	yes	no	no	no	yes	yes	yes	yes	no	elevated	normal	normal
63233	2008-04-23	female	7.02	crowding	outside	inside	Hep A	8948	8948	yes	6	(5,11]	yes	no	yes	yes	no	yes	yes	yes	no	elevated	elevated	elevated
41341	2009-03-26	female	1.15	no crowding	outside	inside	no Hep A				6	(5,11]	yes	no	no	no	yes	yes	yes	yes	no	elevated	elevated	elevated
50518	2010-01-27	female	9.15	crowding	inside	inside	Hep A				5	[0,5]	yes	no	no	yes	yes	yes	no	no	no	elevated	elevated	normal
43410	2009-08-20	female	7.17	no crowding	outside	inside	no Hep A				7	(5,11]	yes	no	yes	no	yes	yes	yes	yes	no	elevated	elevated	elevated
47408	2009-08-19	female	6.99	no crowding	outside	inside	Hep A				6	(5,11]	yes	no	yes	no	yes	no	yes	yes	no	elevated	elevated	elevated
47005	2006-05-12	female	11.58	crowding	outside	outside	Hep A	64560	64560	yes	2	[0,5]	yes	no	no	yes	yes	no	yes	yes	no	elevated	elevated	elevated
64145	2007-06-20	female	5.08	crowding	outside	outside	Hep A	9304	9304	yes	1	[0,5]	no	yes	no	yes	yes	yes	yes	yes	no	elevated	elevated	elevated
40022	2006-08-11	female	4.83	no crowding	outside	outside	Hep A	5968	5968	yes	2	[0,5]	yes	yes	yes	yes	yes	yes	yes	yes	no	elevated	normal	elevated
47269	2008-09-08	female	7.77	crowding	outside	outside	Hep A				3	[0,5]	yes	yes	yes	yes	yes	yes	yes	yes	no	elevated	elevated	elevated
40225	2008-04-04	female	8.75	no crowding	inside	inside	Hep A	6957	6957	yes	7	(5,11]	no	yes	no	yes	yes	yes	yes	no	no	elevated	elevated	elevated
40262	2008-08-08	female	11.2	crowding	outside	outside	Hep A	40700	40700	yes	31	>11	yes	no	no	yes	no	yes	yes	yes	no	elevated	elevated	elevated
62405	2009-08-17	female	0.34	crowding	outside	outside	no Hep A				15	>11	yes	yes	yes	no	no	yes	yes	yes	no	elevated	elevated	elevated
50393	2009-07-08	female	8.41	no crowding	outside	outside	Hep A				5	[0,5]	yes	no	no	no	no	yes	no	yes	no	elevated	elevated	elevated
63176	2007-10-18	female	7.27	crowding	outside	inside	Hep A	8931	8931	yes	4	[0,5]	yes	no	yes	yes	yes	no	yes	no	no	elevated	elevated	elevated
45510	2010-01-22	female	13.95	crowding	inside	inside	no Hep A				3	[0,5]	yes	yes	yes	yes	yes	yes	yes	yes	no	elevated	elevated	elevated
60543	2010-03-03	female	5.19	no crowding	outside	inside	Hep A				6	(5,11]	yes	no	no	no	no	no	no	no	no	elevated	elevated	normal
50525	2010-02-03	female	6.78	crowding	outside	inside	Hep A				2	[0,5]	yes	no	no	yes	yes	yes	yes	yes	no	elevated	elevated	elevated
60381	2009-06-03	female	5.75	no crowding	inside	inside	no Hep A				3	[0,5]	yes	yes	yes	yes	yes	yes	yes	yes	no	elevated	elevated	elevated
60344	2009-03-27	female	4.41	no crowding	outside	outside	no Hep A				4	[0,5]	yes	yes	yes	yes	yes	yes	yes	yes	no	elevated	elevated	elevated
43539	2010-02-26	female	2.61	crowding	inside	inside	no Hep A				1	[0,5]	yes	no	yes	yes	yes	yes	yes	yes	no	elevated	elevated	elevated
52352	2009-04-13	female	7.25	crowding	inside	inside	Hep A				3	[0,5]	no	no	no	no	yes	yes	yes	yes	no	elevated	elevated	elevated
64406	2009-08-17	female	0.34	crowding	outside	outside	no Hep A				1098	>11	yes	yes	yes	no	yes	yes	yes	yes	no	elevated	elevated	elevated
60544	2010-03-03	female	8.56	crowding	inside	inside	Hep A				2	[0,5]	yes	no	no	no	yes	yes	yes	yes	no	elevated	elevated	elevated
60312	2009-01-27	female	6.04	no crowding	inside	inside	Hep A				9	(5,11]	yes	yes	yes	yes	no	yes	yes	yes	no	elevated	elevated	elevated
50443	2009-09-02	female	6.26	crowding	outside	outside	Hep A						yes	no	no	yes	yes	yes	yes	yes	no	elevated	elevated	elevated
65100	2007-02-15	female	6.6	crowding	outside	inside	Hep A	52880	52880	yes	4	[0,5]	yes	no	yes	no	no	yes	yes	yes	no	elevated	elevated	elevated
56337	2009-03-25	female	0.86	crowding	outside	outside	no Hep A				5	[0,5]	yes	no	no	no	yes	yes	yes	yes	yes	elevated	elevated	elevated
40407	2009-08-18	female	7.33	crowding	inside	inside	no Hep A				8	(5,11]	yes	yes	yes	no	yes	yes	yes	yes	no	elevated	elevated	elevated
60486	2009-11-20	female	60.84	crowding	inside	inside	no Hep A				8	(5,11]	no	no	no	no	no	no	no	no	no	elevated	elevated	normal
42532	2010-02-12	female	3.73	crowding	inside	inside	no Hep A				3	[0,5]	yes	no	no	no	yes	yes	yes	yes	no	elevated	elevated	elevated
610110	2007-03-12	female	6.62	no crowding	outside	inside	Hep A	7312	7312	yes	6	(5,11]	yes	yes	yes	yes	yes	yes	yes	yes	no	elevated	elevated	elevated
50425	2009-09-04	female	7.36	crowding	inside	inside	Hep A				2	[0,5]	no	no	yes	no	yes	yes	yes	yes	no	elevated	elevated	elevated
65171	2007-10-11	female	8.27	no crowding	inside	inside	Hep A	9523	9523	yes	7	(5,11]	yes	no	no	yes	yes	yes	yes	no	no	elevated	elevated	elevated
66335	2009-03-25	female	7.64	crowding	outside	outside	Hep A				3	[0,5]	yes	yes	yes	yes	yes	yes	yes	yes	no	elevated	elevated	elevated
42332	2009-03-24	female	6.12	no crowding	outside	outside	Hep A				37	>11	yes	yes	no	yes	yes	no	yes	yes	yes	elevated	normal	normal
50358	2009-05-05	female	6.68	crowding	outside	inside	Hep A				4	[0,5]	yes	no	yes	yes	no	yes	no	yes	no	elevated	elevated	elevated
50409	2009-08-20	female	3.15	no crowding	outside	inside	Hep A				7	(5,11]	yes	no	no	no	no	yes	no	no	no	elevated	elevated	elevated
54340	2009-03-26	female	8.95	crowding	inside	inside	Hep A				6	(5,11]	yes	yes	yes	yes	no	yes	yes	yes	no	elevated	elevated	elevated
60313	2009-01-30	female	35.28	crowding	inside	inside	no Hep A				121	>11	yes	yes	yes	yes	no	no	yes	yes	no	elevated	elevated	elevated
40524	2010-02-02	female	9.95	crowding	outside	outside	Hep A				5	[0,5]	yes	yes	yes	yes	yes	yes	yes	yes	no	elevated	elevated	elevated
66180	2007-10-24	female	10.06	no crowding	outside	inside	Hep A	9606	9606	yes	2	[0,5]	yes	no	yes	yes	yes	yes	yes	yes	no	elevated	elevated	elevated
60293	2008-10-29	female	9.02	crowding	inside	inside	Hep A				6	(5,11]	yes	no	no	yes	yes	yes	yes	no	no	elevated	elevated	elevated
60467	2009-10-26	female	9.98	no crowding	inside	inside	Hep A				15	>11	yes	yes	yes	no	no	yes	yes	yes	no	elevated	elevated	elevated
66178	2007-10-21	female	5.83	no crowding	inside	inside	Hep A	7503	7503	yes	3	[0,5]	yes	no	yes	no	no	yes	yes	yes	no	elevated	elevated	elevated
40351	2009-04-03	female	7.56	crowding	outside	outside	Hep A				2	[0,5]	yes	no	yes	yes	no	yes	yes	yes	no	elevated	elevated	elevated
40134	2007-05-10	female	10.92	crowding	outside	inside	Hep A	9587	9587	yes	4	[0,5]	yes	no	yes	yes	yes	yes	yes	yes	no	elevated	elevated	elevated
51530	2010-02-11	female	10.11	crowding	outside	inside	no Hep A				3	[0,5]	yes	no	no	yes	yes	yes	yes	yes	no	elevated	elevated	elevated
51549	2010-03-05	female	7.02	crowding	inside	inside	Hep A				13	>11	no	yes	yes	no	yes	yes	no	yes	no	elevated	elevated	elevated
62414	2009-08-26	female	7.25	crowding	inside	inside	Hep A				3	[0,5]	yes	yes	yes	no	yes	yes	yes	yes	no	elevated	elevated	elevated
40177	2007-10-19	female	9.36	crowding	outside	inside	Hep A	6500	6500	yes	4	[0,5]	yes	no	yes	yes	yes	yes	yes	yes	yes	elevated	elevated	elevated
63013	2006-07-07	female	3.54	crowding	inside	inside	Hep A	65090	65090	yes	2	[0,5]	yes	no	yes	no	no	no	yes	yes	no	elevated	elevated	elevated
63349	2009-03-30	female	0.62	crowding	inside	inside	Hep A				3	[0,5]	yes	no	no	no	yes	no	yes	yes	no	elevated	elevated	elevated
52346	2009-03-27	female	4.64	no crowding	outside	outside	no Hep A				7	(5,11]	no	yes	no	yes	yes	yes	yes	yes	no	elevated	normal	elevated
40213	2008-02-22	female	5.3	crowding	outside	inside	Hep A	41950	41950	yes	8	(5,11]	yes	yes	yes	yes	no	yes	no	no	no	elevated	elevated	elevated
54071	2006-10-27	female	4.75	crowding	inside	inside	Hep A	8532	8532	yes	0	[0,5]	yes	no	no	yes	yes	no	yes	no	no	elevated	elevated	normal
45211	2008-02-21	female	8.28	crowding	inside	inside	Hep A	9088	9088	yes	7	(5,11]	yes	no	yes	no	yes	yes	no	yes	no	elevated	elevated	elevated
60473	2009-10-30	female	3.06	no crowding	inside	inside	Hep A				8	(5,11]	yes	no	no	yes	yes	no	yes	no	no	elevated	elevated	elevated
64146	2007-06-14	female	5.72	crowding	outside	inside	Hep A	8604	8604	yes	6	(5,11]	yes	yes	yes	yes	yes	yes	yes	yes	no	elevated	elevated	elevated
67136	2007-05-08	female	6.09	crowding	outside	inside	Hep A	45480	45480	yes	0	[0,5]	yes	yes	yes	yes	yes	yes	yes	yes	no	elevated	elevated	elevated
65103	2007-02-19	female	9.87	no crowding	inside	inside	Hep A	3621	3621	yes	6	(5,11]	yes	yes	yes	yes	yes	yes	yes	yes	no	elevated	elevated	elevated
52345	2009-03-27	female	12.81	crowding	inside	inside	Hep A				7	(5,11]	yes	no	yes	no	yes	no	yes	yes	no	elevated	elevated	elevated
50226	2008-04-09	female	3.58	no crowding	outside	outside	no Hep A	< 10	5	no	6	(5,11]	yes	yes	yes	yes	yes	yes	yes	yes	no	elevated	elevated	elevated
60011	2006-06-20	female	12.59	no crowding	inside	inside	Hep A	50340	50340	yes	3	[0,5]	yes	no	yes	yes	yes	yes	yes	yes	no	elevated	elevated	elevated
41164	2007-10-03	female	6.22	crowding	outside	inside	Hep A	9275	9275	yes	4	[0,5]	yes	no	no	yes	yes	yes	yes	yes	no	elevated	elevated	elevated
50422	2009-08-31	female	9.45	crowding	outside	outside	Hep A				2	[0,5]	yes	no	no	no	yes	no	yes	yes	no	elevated	elevated	elevated
65386	2009-06-12	female	3.64	crowding	outside	outside	Hep A				3	[0,5]	yes	yes	no	yes	yes	yes	yes	yes	no	elevated	elevated	elevated
50456	2009-10-09	female	11.47	crowding	outside	inside	Hep A				8	(5,11]	yes	no	yes	no	yes	yes	yes	yes	no	elevated	elevated	elevated
63042	2006-09-04	female	6.37	crowding	outside	inside	Hep A	45720	45720	yes	3	[0,5]	yes	yes	yes	no	no	yes	yes	yes	no	elevated	elevated	elevated
50270	2008-09-12	female	36.3	no crowding	inside	inside	no Hep A				11	(5,11]	yes	no	yes	no	no	no	yes	no	no	elevated	elevated	elevated
47373	2009-05-22	female	4.84	crowding	outside	inside	Hep A				8	(5,11]	yes	no	no	no	no	yes	no	no	no	elevated	elevated	elevated
64430	2009-09-10	female	7.86	no crowding	outside	inside	Hep A				9	(5,11]	yes	no	yes	yes	yes	yes	yes	yes	no	elevated	elevated	elevated
64507	2010-01-20	female	11.79	no crowding	inside	inside	Hep A				2	[0,5]	yes	no	no	yes	yes	yes	yes	yes	no	elevated	elevated	elevated
66219	2008-03-19	female	3.2	crowding	outside	inside	Hep A	6694	6694	yes	4	[0,5]	yes	no	no	no	no	yes	yes	yes	no	elevated	elevated	normal
54020	2006-07-27	female	5.12	no crowding	outside	inside	Hep A	46010	46010	yes	5	[0,5]	yes	no	no	yes	yes	yes	yes	yes	no	elevated	elevated	elevated
60307	2009-01-21	female	2.97	crowding	inside	inside	Hep A				6	(5,11]	yes	yes	yes	yes	yes	yes	yes	yes	no	elevated	elevated	elevated
50107	2007-03-08	female	6.32	crowding	outside	inside	Hep A	8733	8733	yes	7	(5,11]	yes	no	yes	yes	yes	yes	yes	yes	no	elevated	elevated	elevated
41485	2009-11-17	female	36.5	no crowding	inside	inside	no Hep A				16	>11	no	no	yes	yes	yes	yes	yes	yes	no	elevated	elevated	elevated
64259	2008-08-05	female	8.47	crowding	inside	inside	Hep A	9766	9766	yes	8	(5,11]	yes	no	yes	yes	no	no	yes	yes	no	elevated	elevated	elevated
42490	2009-12-01	female	0.72	crowding	inside	inside	no Hep A				1	[0,5]	yes	no	no	no	yes	yes	yes	yes	no	elevated	elevated	elevated
40215	2008-03-03	female	7.11	crowding	inside	outside	Hep A	38830	38830	yes	14	>11	yes	yes	yes	no	yes	yes	yes	yes	no	elevated	elevated	elevated
42478	2009-11-05	female	3.11	no crowding	outside	inside	Hep A				3	[0,5]	no	no	no	yes	yes	no	no	yes	no	elevated	elevated	elevated
40266	2008-09-01	female	10.93	no crowding	inside	inside	Hep A				7	(5,11]	yes	yes	yes	yes	no	no	yes	yes	no	elevated	elevated	normal
54002	2006-05-04	female	7.87	crowding	inside	inside	Hep A	1485	1485	yes	3	[0,5]	no	yes	yes	yes	yes	yes	yes	yes	no	elevated	elevated	elevated
40139	2007-05-31	female	7.61	no crowding	inside	inside	Hep A	5661	5661	yes	1	[0,5]	yes	no	no	yes	yes	no	yes	yes	no	elevated	elevated	elevated
50282	2008-10-15	female	11.23	no crowding	outside	inside	Hep A				8	(5,11]	yes	yes	yes	yes	yes	yes	yes	yes	no	elevated	elevated	elevated
40212	2008-02-22	female	3.5	no crowding	outside	outside	no Hep A	209900	209900	yes	4	[0,5]	yes	yes	yes	yes	no	yes	no	yes	no	elevated	elevated	elevated
60475	2009-10-30	female	13.28	no crowding	inside	inside	no Hep A				2	[0,5]	no	yes	yes	no	yes	yes	yes	yes	no	elevated	elevated	elevated
51062	2006-10-16	female	8.64	crowding	inside	outside	Hep A	49950	49950	yes	4	[0,5]	yes	yes	yes	yes	yes	yes	yes	yes	no	elevated	elevated	elevated
41375	2009-05-25	female	30.08	no crowding	outside	inside	no Hep A				4	[0,5]	yes	no	yes	yes	yes	yes	yes	no	no	elevated	elevated	elevated
60382	2009-06-03	female	7.39	crowding	outside	outside	no Hep A				2	[0,5]	yes	yes	yes	yes	no	yes	yes	yes	no	elevated	normal	normal
47426	2009-09-03	female	8.58	no crowding	inside	inside	no Hep A				2	[0,5]	yes	no	no	yes	yes	yes	yes	yes	no	elevated	elevated	elevated
60499	2010-01-14	female	61.73	no crowding	inside	inside	no Hep A				13	>11	yes	yes	no	no	yes	yes	yes	yes	yes	elevated	elevated	normal
54044	2006-08-28	female	6.06	no crowding	inside	inside	Hep A	8338	8338	yes	5	[0,5]	yes	no	no	yes	yes	yes	yes	yes	no	elevated	elevated	elevated
41372	2009-05-13	female	34.09	no crowding	inside	inside	no Hep A				15	>11	yes	no	yes	yes	yes	yes	no	no	no	elevated	elevated	normal
40208	2008-02-20	female	9.35	crowding	outside	inside	Hep A	5585	5585	yes	5	[0,5]	yes	no	yes	yes	no	yes	yes	yes	no	elevated	elevated	elevated
60016	2006-07-03	female	15.73	no crowding	inside	inside	Hep A	6919	6919	yes	4	[0,5]	yes	no	yes	yes	no	yes	yes	yes	no	elevated	elevated	elevated
40174	2007-10-15	female	4.84	crowding	outside	inside	Hep A	8730	8730	yes	5	[0,5]	yes	yes	yes	yes	yes	yes	yes	yes	no	elevated	elevated	elevated
40559	2010-03-19	female	10.15	no crowding	outside	outside	no Hep A				18	>11	yes	no	yes	yes	yes	yes	yes	yes	no	elevated	elevated	elevated
66509	2010-01-21	female	3.22	crowding	outside	inside	Hep A				2	[0,5]	yes	yes	yes	no	no	yes	yes	yes	no	elevated	elevated	elevated
43317	2009-02-13	female	11.01	crowding	inside	inside	Hep A						yes	no	yes	yes	yes	yes	yes	no	no	elevated	elevated	elevated
63175	2007-10-18	female	5.07	crowding	outside	inside	Hep A	8802	8802	yes	2	[0,5]	yes	no	no	yes	yes	no	yes	no	no	elevated	elevated	elevated
63101	2007-02-16	female	9.36	crowding	inside	inside	Hep A	4300	4300	yes	3	[0,5]	yes	no	yes	no	yes	yes	yes	yes	no	elevated	elevated	elevated
40150	2007-07-03	female	55.49	crowding	outside	inside	no Hep A	2567	2567	yes	2	[0,5]	yes	no	yes	yes	yes	yes	yes	no	no	elevated	elevated	elevated
66092	2007-02-07	female	11.27	no crowding	inside	inside	Hep A	54060	54060	yes	6	(5,11]	yes	yes	yes	yes	yes	yes	yes	yes	no	elevated	elevated	elevated
40356	2009-04-21	female	3.63	crowding	outside	outside	Hep A				3	[0,5]	yes	no	no	yes	yes	yes	no	yes	no	elevated	elevated	normal
60300	2008-11-19	female	10.34	crowding	outside	inside	Hep A				4	[0,5]	yes	no	yes	yes	yes	yes	yes	yes	no	elevated	elevated	elevated
66440	2009-09-21	female	8.43	crowding	inside	inside	Hep A				4	[0,5]	yes	no	no	no	yes	yes	no	yes	no	elevated	elevated	elevated
67494	2009-12-09	female	8.74	crowding	inside	outside	Hep A				1442	>11	yes	no	no	yes	yes	yes	yes	yes	no	elevated	elevated	elevated
30353	2009-04-14	female	26.38	no crowding	inside	inside	no Hep A				2	[0,5]	yes	no	no	no	yes	no	no	yes	no	elevated	elevated	elevated
44550	2010-03-02	female	5.4	crowding	outside	inside	Hep A				4	[0,5]	yes	no	no	yes	yes	yes	yes	yes	no	elevated	elevated	elevated
50464	2009-10-21	female	7.13	crowding	outside	inside	Hep A				3	[0,5]	yes	no	no	yes	yes	no	yes	yes	no	elevated	elevated	elevated
40099	2007-02-15	female	10.82	crowding	outside	inside	Hep A	3592	3592	yes	7	(5,11]	yes	no	yes	yes	yes	yes	yes	yes	no	elevated	elevated	elevated
50550	2010-03-05	female	6.3	crowding	inside	inside	Hep A				9	(5,11]	yes	no	yes	yes	no	yes	yes	yes	no	elevated	elevated	elevated
43555	2010-03-10	female	3.81	no crowding	outside	inside	Hep A				2	[0,5]	yes	yes	yes	yes	no	yes	yes	yes	no	elevated	elevated	elevated
64218	2008-03-25	female	7.74	no crowding	inside	inside	Hep A	6315	6315	yes	8	(5,11]	yes	no	yes	yes	yes	yes	yes	yes	no	elevated	elevated	elevated
66468	2009-10-27	female	7.14	no crowding	inside	inside	no Hep A				30	>11	no	no	no	yes	yes	no	no	no	no	elevated	normal	normal
54018	2006-07-27	female	14.89	crowding	outside	inside	Hep A	5419	5419	yes	6	(5,11]	yes	no	no	yes	yes	yes	yes	yes	no	elevated	elevated	elevated
40472	2009-10-29	female	9.58	crowding	inside	inside	no Hep A				10	(5,11]	yes	no	no	no	yes	yes	no	yes	no	elevated	elevated	normal
50469	2009-10-29	female	52.74	no crowding	inside	inside	no Hep A				122	>11	no	no	no	yes	yes	yes	no	yes	yes	elevated	elevated	normal
47390	2009-07-02	female	6.45	no crowding	inside	inside	Hep A				3	[0,5]	yes	no	yes	no	yes	yes	yes	yes	no	elevated	elevated	elevated
43523	2010-02-02	female	58.11	no crowding	inside	inside	no Hep A				5	[0,5]	yes	no	no	yes	no	no	yes	yes	no	elevated	elevated	normal
63517	2010-01-26	female	4.21	no crowding	inside	inside	no Hep A				4	[0,5]	yes	no	no	yes	no	yes	yes	yes	no	elevated	elevated	normal
47054	2006-09-18	female	7.01	crowding	outside	outside	Hep A	4291	4291	yes	3	[0,5]	yes	no	no	yes	yes	yes	yes	yes	no	elevated	elevated	elevated
63097	2007-02-09	female	8.1	no crowding	outside	outside	Hep A	8677	8677	yes	4	[0,5]	yes	yes	yes	yes	yes	yes	yes	yes	no	elevated	elevated	elevated
43063	2006-10-18	female	5.8	crowding	inside	inside	Hep A	2124	2124	yes	6	(5,11]	yes	no	no	yes	yes	yes	yes	yes	no	elevated	elevated	elevated
61033	2006-08-11	female	22.02	crowding	outside	outside	no Hep A	6581	6581	yes	4	[0,5]	yes	no	no	yes	yes	yes	yes	yes	no	elevated	normal	normal
51433	2009-09-16	female	3	no crowding	inside	inside	no Hep A				8	(5,11]	yes	yes	yes	yes	yes	no	yes	yes	no	elevated	elevated	elevated
40529	2010-02-09	female	8.57	no crowding	outside	inside	Hep A				5	[0,5]	yes	yes	no	yes	yes	no	yes	yes	no	elevated	elevated	elevated
60423	2009-09-01	female	5	no crowding	inside	inside	Hep A				3	[0,5]	yes	no	no	yes	yes	no	yes	yes	no	elevated	elevated	elevated
40207	2008-02-14	female	5.92	no crowding	inside	inside	Hep A	70180	70180	yes	7	(5,11]	yes	yes	yes	yes	yes	yes	yes	yes	no	elevated	elevated	elevated
60068	2006-10-24	female	5.48	no crowding	inside	inside	Hep A	40980	40980	yes	1	[0,5]	yes	no	no	no	no	yes	no	yes	no	elevated	elevated	elevated
40304	2008-11-24	female	9.63	crowding	outside	inside	Hep A				2	[0,5]	yes	no	yes	yes	yes	yes	yes	no	no	elevated	elevated	elevated
56329	2009-03-23	female	2.61	crowding	inside	inside	Hep A				3	[0,5]	yes	no	no	yes	yes	yes	yes	yes	no	elevated	elevated	normal
42547	2010-03-04	female	12.6	crowding	inside	inside	no Hep A				3	[0,5]	yes	no	no	yes	no	no	yes	yes	no	elevated	elevated	elevated
40290	2008-10-27	female	9.96	crowding	outside	inside	Hep A				7	(5,11]	yes	no	yes	yes	yes	yes	yes	yes	no	elevated	elevated	elevated
56515	2010-01-26	female	2.95	crowding	inside	inside	no Hep A				3	[0,5]	yes	no	no	yes	no	yes	yes	yes	no	elevated	elevated	normal
40246	2008-06-26	female	3.81	no crowding	inside	inside	no Hep A	< 60 (few serum)			22	>11	yes	yes	yes	yes	yes	yes	yes	yes	no	elevated	elevated	normal
60220	2008-03-27	female	7.36	crowding	outside	inside	Hep A	8006	8006	yes	6	(5,11]	yes	no	yes	yes	no	yes	no	yes	no	elevated	elevated	elevated
41251	2008-07-17	female	20.15	crowding	outside	inside	Hep A	6468	6468	yes	15	>11	yes	no	yes	yes	no	yes	yes	yes	no	elevated	elevated	elevated
63363	2009-05-11	female	0.64	no crowding	inside	inside	no Hep A				3	[0,5]	no	yes	yes	no	yes	yes	yes	yes	no	elevated	elevated	elevated
50284	2008-10-20	female	3.11	crowding	outside	inside	Hep A				4	[0,5]	yes	no	no	no	no	yes	yes	yes	no	elevated	elevated	elevated
61014	2006-07-10	female	7.62	no crowding	inside	inside	Hep A	9912	9912	yes	2	[0,5]	yes	no	yes	yes	yes	no	no	no	no	elevated	elevated	elevated
40172	2007-10-15	male	0.59	no crowding	inside	inside	no Hep A	341	341	yes	28	>11	yes	no	no	no	no	no	no	no	no	normal	normal	normal
66389	2009-06-23	male	6.18	no crowding	inside	inside	Hep A				3	[0,5]	yes	no	yes	no	no	yes	yes	yes	no	normal	normal	normal
54281	2008-10-15	male	38.29	no crowding	inside	inside	no Hep A				30	>11	yes	no	no	yes	no	no	yes	yes	no	normal	normal	elevated
60285	2008-10-16	male	33.52	no crowding	inside	inside	no Hep A				22	>11	no	no	no	yes	no	yes	yes	yes	no	normal	normal	normal
50241	2008-06-11	male	5.26	no crowding	inside	inside	no Hep A	119	119	yes	6	(5,11]	yes	yes	yes	yes	no	yes	yes	yes	no	normal	normal	normal
44170	2007-10-10	male	18.42	no crowding	inside	inside	no Hep A	32300	32300	yes	6	(5,11]	yes	no	no	no	no	no	no	no	no	normal	normal	normal
67051	2006-09-18	male	11.74	crowding	outside	inside	no Hep A	12550	12550	yes	8	(5,11]	yes	no	yes	no	no	yes	yes	yes	no	normal	normal	normal
54070	2006-10-31	male	14.02	crowding	inside	inside	no Hep A	8820	8820	yes	10	(5,11]	yes	no	no	no	no	yes	yes	yes	no	normal	normal	elevated
40265	2008-08-29	male	3.71	crowding	outside	inside	no Hep A				2	[0,5]	no	no	no	no	no	yes	no	yes	no	normal	normal	normal
66162	2007-10-03	male	10.69	no crowding	inside	inside	Hep A	31770	31770	yes	23	>11	yes	yes	yes	yes	yes	yes	yes	yes	no	normal	normal	normal
60123	2007-03-24	male	13.04	crowding	outside	outside	no Hep A	29070	29070	yes	4	[0,5]	yes	no	no	yes	no	no	yes	yes	no	normal	normal	normal
41004	2006-05-08	male	4.97	no crowding	inside	inside	Hep A	9905	9905	yes	4	[0,5]	yes	yes	yes	yes	yes	no	no	no	no	normal	elevated	elevated
66080	2006-11-16	male	6.18	no crowding	inside	inside	Hep A	45060	45060	yes	2	[0,5]	yes	no	no	yes	yes	yes	yes	yes	no	normal	normal	elevated
61029	2006-08-07	male	3.8	crowding	outside	outside	no Hep A	607	607	yes	38	>11	yes	no	no	yes	no	yes	yes	yes	no	normal	normal	normal
60143	2007-06-13	male	56.86	crowding	inside	inside	no Hep A	3917	3917	yes	16	>11	yes	no	yes	no	no	yes	no	yes	no	normal	normal	elevated
51008	2006-06-15	male	7.1	crowding	outside	inside	Hep A	181000	181000	yes	3	[0,5]	yes	no	no	yes	yes	yes	yes	yes	no	normal	normal	normal
41040	2006-05-24	male	19.6	no crowding	inside	inside	no Hep A	< 10	5	no			yes	no	no	no	no	yes	no	yes	yes	normal	normal	normal
40135	2007-05-11	male	12.39	no crowding	inside	inside	no Hep A	6362	6362	yes	9	(5,11]	yes	no	yes	yes	yes	yes	yes	yes	no	normal	normal	normal
45455	2009-10-08	male	1.29	no crowding	inside	inside	no Hep A				7	(5,11]	yes	no	no	no	no	no	no	yes	no	normal	normal	elevated
42236	2008-05-16	male	7.93	crowding	outside	inside	no Hep A	62	62	yes	6	(5,11]	yes	no	no	yes	no	no	yes	no	no	normal	normal	normal
50359	2009-05-06	male	56.44	no crowding	outside	inside	no Hep A				14	>11	yes	no	yes	yes	yes	yes	yes	yes	no	normal	normal	normal
41392	2009-07-01	male	6.81	no crowding	inside	inside	no Hep A				4	[0,5]	no	no	no	no	no	yes	yes	yes	no	normal	normal	normal
46019	2006-08-01	male	5.75	crowding	outside	inside	Hep A	67610	67610	yes	47	>11	yes	yes	yes	yes	yes	yes	yes	yes	no	normal	normal	normal
44488	2009-11-24	male	10.53	no crowding	inside	outside	no Hep A				327	>11	yes	no	no	yes	no	no	no	yes	no	normal	normal	normal
60083	2007-01-05	male	7.27	no crowding	outside	inside	Hep A	9129	9129	yes	4	[0,5]	yes	no	no	yes	yes	yes	yes	yes	no	normal	normal	normal
47049	2006-09-08	male	21.75	crowding	outside	outside	no Hep A	29050	29050	yes	3	[0,5]	yes	no	no	no	no	yes	yes	yes	no	normal	normal	normal
50228	2008-04-10	male	8.48	crowding	outside	outside	no Hep A	28170	28170	yes	5	[0,5]	no	no	no	no	no	no	yes	yes	no	normal	normal	normal
60355	2009-04-15	male	13.3	crowding	inside	inside	no Hep A				11	(5,11]	yes	no	no	no	yes	no	no	yes	no	normal	normal	normal
60306	2009-01-16	male	7	no crowding	inside	inside	Hep A				11	(5,11]	yes	yes	yes	yes	yes	yes	yes	yes	no	normal	elevated	elevated
63102	2007-02-20	male	7.21	no crowding	outside	inside	Hep A	3115	3115	yes	4	[0,5]	yes	no	yes	yes	yes	yes	no	yes	no	normal	elevated	elevated
60361	2009-05-11	male	8.32	crowding	outside	outside	no Hep A				6	(5,11]	yes	no	no	yes	yes	yes	yes	yes	no	normal	normal	elevated
50015	2006-07-13	male	7.87	crowding	outside	outside	no Hep A	65000	65000	yes	5	[0,5]	yes	no	no	yes	no	yes	yes	yes	no	normal	normal	normal
50484	2009-11-18	male	0.34	crowding	inside	inside	no Hep A				1	[0,5]	yes	no	yes	yes	no	no	yes	no	no	normal	normal	normal
60124	2007-03-24	male	6.84	crowding	outside	outside	Hep A	46160	46160	yes	0	[0,5]	yes	no	no	yes	yes	yes	yes	yes	no	normal	normal	normal
41122	2007-03-21	male	9.91	crowding	outside	inside	Hep A	7916	7916	yes	6	(5,11]	yes	no	yes	no	no	yes	no	no	no	normal	elevated	elevated
54272	2008-09-11	male	4.63	no crowding	outside	inside	no Hep A				10	(5,11]	yes	no	no	no	no	no	no	no	no	normal	normal	normal
50311	2009-01-26	male	15.54	no crowding	inside	inside	no Hep A				25	>11	yes	no	yes	no	no	no	no	no	no	normal	normal	elevated
6417	2009-08-27	male	8.04	crowding	outside	outside	no Hep A				8	(5,11]	yes	yes	yes	yes	yes	yes	yes	yes	no	normal	normal	elevated
66247	2008-07-04	male	2.66	no crowding	outside	inside	no Hep A	615	615	yes	2	[0,5]	no	no	no	no	yes	yes	yes	yes	no	normal	elevated	normal
50030	2006-08-07	male	3.47	crowding	outside	inside	Hep A	72520	72520	yes	37	>11	yes	no	yes	no	no	yes	no	no	no	normal	normal	normal
50287	2008-10-24	male	3.72	crowding	inside	inside	Hep A				7	(5,11]	yes	no	yes	yes	yes	yes	yes	yes	no	normal	normal	elevated
40271	2008-09-17	male	3.24	no crowding	inside	inside	no Hep A				18	>11	no	no	yes	yes	yes	yes	yes	yes	no	normal	normal	normal
40148	2007-07-03	male	8.23	crowding	inside	inside	no Hep A	147100	147100	yes	3	[0,5]	no	no	no	yes	no	yes	no	no	no	normal	normal	normal
51116	2007-03-19	male	6.99	no crowding	inside	inside	no Hep A	23310	23310	yes	18	>11	yes	no	no	yes	yes	yes	yes	yes	no	normal	normal	normal
62185	2007-11-01	male	5.98	no crowding	inside	inside	no Hep A	28670	28670	yes	3	[0,5]	yes	no	no	yes	yes	yes	yes	yes	no	normal	normal	normal
43153	2007-09-10	male	8.82	crowding	inside	inside	no Hep A	85320	85320	yes	7	(5,11]	no	no	yes	no	no	yes	yes	yes	no	normal	normal	normal
50227	2008-04-10	male	4.22	crowding	outside	outside	no Hep A	< 10	5	no	9	(5,11]	no	no	no	no	no	no	yes	no	no	normal	normal	normal
41309	2009-01-23	male	4.99	no crowding	inside	inside	no Hep A				2	[0,5]	no	no	no	yes	yes	yes	no	yes	no	normal	normal	normal
40239	2008-05-27	male	8.53	no crowding	outside	outside	no Hep A	32080	32080	yes	14	>11	yes	no	no	yes	no	yes	yes	yes	no	normal	normal	normal
60371	2009-05-13	male	21.02	crowding	outside	inside	no Hep A				12	>11	no	no	no	no	no	yes	no	no	no	normal	elevated	elevated
50283	2008-10-20	male	8.47	no crowding	outside	inside	no Hep A				21	>11	no	no	no	no	no	no	yes	yes	no	normal	normal	normal
40278	2008-10-06	male	43.54	no crowding	outside	inside	no Hep A				4	[0,5]	no	no	no	yes	no	yes	yes	no	no	normal	elevated	normal
50232	2008-04-21	male	5.41	no crowding	inside	inside	no Hep A	11	11	no	4	[0,5]	yes	no	no	yes	no	yes	yes	yes	no	normal	normal	normal
60141	2007-06-11	male	3.31	no crowding	outside	outside	no Hep A	26290	26290	yes	8	(5,11]	yes	no	no	no	no	yes	yes	no	no	normal	normal	normal
63248	2008-07-08	male	0.07	no crowding	inside	inside	no Hep A	6173	6173	yes	1	[0,5]	yes	no	yes	no	yes	no	no	no	no	normal	normal	elevated
40261	2008-08-06	male	22.7	crowding	outside	inside	no Hep A	4865	4865	yes	13	>11	yes	no	no	no	no	no	no	no	no	normal	normal	elevated
40254	2008-07-23	male	9.64	crowding	outside	outside	no Hep A	28700	28700	yes	8	(5,11]	yes	no	no	no	no	yes	no	yes	no	normal	normal	normal
51310	2009-01-26	male	8.4	crowding	outside	inside	Hep A				6	(5,11]	yes	no	yes	yes	yes	yes	yes	yes	no	normal	elevated	elevated
63402	2009-08-10	male	5.56	no crowding	inside	inside	no Hep A				11	(5,11]	yes	no	no	yes	no	yes	yes	no	no	normal	elevated	elevated
63196	2007-12-04	male	45.05	no crowding	inside	inside	no Hep A	23450	23450	yes	14	>11	yes	no	no	no	yes	no	yes	yes	no	normal	normal	elevated
66159	2007-10-03	male	8.72	no crowding	inside	inside	no Hep A	39550	39550	yes	13	>11	yes	no	no	yes	no	yes	yes	yes	no	normal	normal	normal
60224	2008-04-02	male	34.43	no crowding	inside	inside	no Hep A	5544	5544	yes	8	(5,11]	yes	no	no	yes	no	no	yes	no	no	normal	normal	normal
41142	2007-06-12	male	13.08	no crowding	inside	inside	no Hep A	50380	50380	yes	4	[0,5]	yes	no	no	no	no	no	no	no	no	normal	normal	normal
40318	2009-02-16	male	7.75	crowding	outside	inside	no Hep A				4	[0,5]	no	no	no	no	no	no	no	no	yes	normal	elevated	normal
50242	2008-06-13	male	0.84	crowding	outside	outside	no Hep A	< 10	5	no	1	[0,5]	yes	no	no	no	no	no	yes	no	no	normal	normal	normal
60482	2009-11-18	male	3.13	no crowding	inside	inside	no Hep A				2	[0,5]	no	no	no	no	no	yes	yes	yes	no	normal	normal	normal
40056	2006-09-12	male	15.56	crowding	inside	inside	Hep A	43620	43620	yes			yes	no	yes	yes	no	yes	yes	yes	no	normal	elevated	elevated
50474	2009-10-30	male	4.57	crowding	outside	outside	no Hep A				16	>11	no	yes	yes	no	yes	no	no	yes	no	normal	normal	normal
43214	2008-03-05	male	42.11	no crowding	inside	inside	no Hep A	1561	1561	yes	14	>11	yes	no	no	yes	no	no	yes	yes	no	normal	normal	normal
66244	2008-06-25	male	3.7	crowding	outside	inside	Hep A	9997	9997	yes	9	(5,11]	yes	no	yes	yes	yes	yes	yes	yes	no	normal	elevated	normal
62129	2007-04-18	male	19.38	no crowding	outside	inside	no Hep A	5189	5189	yes	8	(5,11]	yes	no	no	yes	no	yes	yes	yes	no	normal	normal	elevated
610109	2007-03-09	male	4.16	crowding	outside	outside	no Hep A	< 10	5	no	8	(5,11]	yes	no	no	yes	no	no	yes	yes	no	normal	normal	normal
61039	2006-08-17	male	36.53	crowding	outside	outside	no Hep A	5016	5016	yes	3	[0,5]	no	no	no	no	no	no	no	no	no	normal	normal	normal
64520	2010-01-28	male	17.04	crowding	inside	inside	no Hep A				5	[0,5]	yes	no	no	yes	no	yes	yes	yes	no	normal	normal	elevated
65128	2007-03-29	male	12.94	crowding	inside	inside	Hep A	9105	9105	yes	11	(5,11]	yes	no	yes	yes	yes	yes	yes	yes	no	normal	elevated	normal
62021	2006-07-27	male	14.67	crowding	inside	inside	Hep A	60850	60850	yes	6	(5,11]	yes	no	no	yes	yes	yes	yes	yes	no	normal	elevated	elevated
66161	2007-10-03	male	10.72	crowding	inside	inside	no Hep A	23360	23360	yes	24	>11	yes	no	no	yes	no	yes	yes	yes	no	normal	normal	normal
51199	2008-01-04	male	18.28	no crowding	inside	inside	no Hep A	< 10	5	no	3	[0,5]	yes	no	yes	yes	no	yes	yes	yes	no	normal	normal	normal
50200	2008-01-14	male	13.15	crowding	outside	inside	no Hep A	20340	20340	yes	11	(5,11]	yes	yes	yes	yes	yes	yes	yes	yes	no	normal	normal	elevated
50461	2009-10-12	male	20.54	no crowding	inside	inside	no Hep A				2	[0,5]	yes	no	no	yes	no	no	yes	yes	no	normal	normal	elevated
60481	2009-11-16	male	11.04	no crowding	inside	inside	no Hep A				2	[0,5]	yes	no	no	yes	yes	no	yes	no	no	normal	normal	normal
41089	2007-02-07	male	11.38	no crowding	inside	inside	Hep A	8890	8890	yes	5	[0,5]	yes	no	yes	yes	yes	no	yes	yes	no	normal	elevated	elevated
60059	2006-09-30	male	14.02	crowding	outside	inside	no Hep A	15320	15320	yes	17	>11	yes	no	yes	yes	no	yes	no	no	no	normal	normal	normal
43395	2009-07-14	male	1.51	no crowding	outside	inside	no Hep A				19	>11	no	no	yes	yes	no	yes	no	yes	no	normal	normal	elevated
66182	2007-10-30	male	4.28	crowding	inside	inside	Hep A	34070	34070	yes	4	[0,5]	yes	no	yes	yes	yes	yes	yes	yes	no	normal	normal	elevated
42489	2009-11-30	male	16.65	no crowding	outside	outside	no Hep A				2	[0,5]	yes	no	no	yes	yes	yes	yes	yes	no	normal	normal	normal
50552	2010-03-09	male	7.75	crowding	outside	inside	no Hep A				3	[0,5]	yes	no	no	yes	no	yes	no	yes	no	normal	elevated	normal
60112	2007-03-13	male	13.46	no crowding	inside	inside	no Hep A	9988	9988	yes	2	[0,5]	yes	no	no	yes	yes	yes	yes	yes	no	normal	normal	normal
60302	2008-11-24	male	6.09	crowding	inside	inside	Hep A				0	[0,5]	yes	yes	yes	yes	no	yes	yes	yes	no	normal	normal	normal
41052	2006-09-12	male	10.37	crowding	outside	inside	no Hep A	9310	9310	yes	2	[0,5]	yes	no	no	yes	no	yes	yes	yes	no	normal	normal	normal
63082	2006-11-27	male	43.25	no crowding	inside	inside	no Hep A	9022	9022	yes	2	[0,5]	no	no	no	no	no	no	yes	yes	no	normal	normal	normal
50028	2006-08-07	male	2.41	crowding	outside	inside	no Hep A	7370	7370	yes	37	>11	yes	no	no	no	no	yes	no	no	no	normal	normal	normal
40149	2007-07-03	male	10.3	crowding	outside	inside	no Hep A	41860	41860	yes	4	[0,5]	yes	no	yes	no	no	yes	yes	no	yes	normal	normal	normal
41173	2007-10-16	male	23.45	crowding	outside	inside	no Hep A	21640	21640	yes	3	[0,5]	yes	no	yes	no	no	yes	no	no	no	normal	normal	normal
42121	2007-03-21	male	10.55	no crowding	outside	inside	Hep A	7757	7757	yes	2	[0,5]	yes	no	yes	yes	no	no	yes	no	no	elevated	elevated	elevated
30322	2009-02-26	male	4.39	no crowding	inside	inside	Hep A				3	[0,5]	yes	no	no	no	yes	yes	yes	yes	no	elevated	elevated	elevated
51506	2010-01-20	male	6.92	crowding	outside	inside	no Hep A				6	(5,11]	yes	yes	yes	yes	no	yes	yes	yes	no	elevated	elevated	normal
52370	2009-05-13	male	9.33	crowding	outside	outside	Hep A				6	(5,11]	yes	no	yes	no	yes	yes	yes	yes	no	elevated	elevated	elevated
66138	2007-06-06	male	7.58	no crowding	outside	inside	Hep A	3791	3791	yes	6	(5,11]	yes	yes	yes	no	no	yes	no	yes	no	elevated	elevated	elevated
64252	2008-07-23	male	10.63	no crowding	outside	outside	Hep A	58530	58530	yes	6	(5,11]	yes	no	yes	yes	yes	yes	no	yes	no	elevated	elevated	elevated
40503	2010-01-19	male	5.89	no crowding	inside	inside	Hep A				5	[0,5]	yes	yes	yes	yes	yes	yes	yes	yes	no	elevated	elevated	normal
40462	2009-10-16	male	9.38	crowding	outside	inside	no Hep A				1	[0,5]	yes	no	yes	yes	yes	yes	yes	yes	yes	elevated	elevated	elevated
63119	2007-03-21	male	5.21	crowding	inside	inside	Hep A	8951	8951	yes	4	[0,5]	yes	yes	yes	yes	yes	no	yes	yes	no	elevated	elevated	elevated
40263	2008-08-11	male	2.94	no crowding	outside	inside	no Hep A	< 600 (few serum)			6	(5,11]	yes	no	no	yes	yes	yes	yes	yes	no	elevated	elevated	elevated
54048	2006-09-07	male	7.13	crowding	outside	inside	Hep A	7532	7532	yes	4	[0,5]	yes	no	no	no	yes	yes	no	yes	no	elevated	elevated	elevated
47120	2007-03-20	male	7.16	no crowding	outside	outside	Hep A	8619	8619	yes	2	[0,5]	yes	no	no	yes	yes	yes	yes	yes	no	elevated	elevated	elevated
44445	2009-09-21	male	30.58	no crowding	inside	inside	no Hep A				0	[0,5]	yes	no	no	no	no	yes	no	yes	no	elevated	normal	elevated
64558	2010-03-16	male	9.12	no crowding	inside	inside	Hep A				2	[0,5]	yes	no	yes	yes	yes	yes	yes	yes	no	elevated	normal	elevated
47505	2010-01-20	male	7.28	crowding	outside	inside	Hep A				3	[0,5]	yes	no	no	yes	no	yes	yes	yes	no	elevated	elevated	normal
65231	2008-04-16	male	4.99	no crowding	inside	inside	Hep A	6503	6503	yes	9	(5,11]	yes	no	no	yes	yes	yes	yes	yes	no	elevated	elevated	elevated
51367	2009-05-13	male	7.03	no crowding	outside	outside	no Hep A				3	[0,5]	yes	yes	yes	yes	no	yes	yes	yes	no	elevated	elevated	elevated
41253	2008-07-23	male	6.16	no crowding	inside	inside	Hep A	8332	8332	yes	42	>11	yes	yes	yes	no	yes	yes	yes	no	no	elevated	elevated	elevated
45439	2009-09-21	male	1.99	crowding	inside	inside	no Hep A				1	[0,5]	yes	yes	yes	no	no	no	no	yes	no	elevated	elevated	elevated
60376	2009-05-28	male	3.19	no crowding	inside	inside	Hep A				8	(5,11]	yes	no	no	no	yes	yes	yes	yes	no	elevated	elevated	elevated
60546	2010-03-04	male	4.69	no crowding	inside	inside	Hep A				3	[0,5]	yes	yes	yes	yes	yes	no	yes	yes	no	elevated	elevated	elevated
41305	2008-11-27	male	45.82	no crowding	inside	inside	no Hep A				9	(5,11]	yes	no	no	yes	yes	yes	yes	yes	no	elevated	elevated	elevated
40276	2008-09-29	male	5.23	no crowding	outside	outside	Hep A				9	(5,11]	yes	yes	yes	no	no	yes	yes	yes	no	elevated	elevated	elevated
54067	2006-11-01	male	5.19	no crowding	outside	inside	Hep A	42630	42630	yes	3	[0,5]	yes	yes	no	no	yes	yes	yes	yes	no	elevated	elevated	elevated
60192	2007-11-20	male	4.08	no crowding	outside	inside	Hep A	7912	7912	yes	4	[0,5]	yes	no	yes	yes	yes	yes	no	yes	no	elevated	elevated	elevated
63184	2007-10-30	male	4.63	no crowding	inside	inside	Hep A	34730	34730	yes	5	[0,5]	yes	yes	yes	yes	yes	no	yes	no	no	elevated	elevated	elevated
41280	2008-04-29	male	24.77	crowding	outside	inside	no Hep A						yes	no	yes	yes	yes	yes	no	yes	no	elevated	normal	normal
64037	2006-08-16	male	3.87	no crowding	outside	inside	Hep A	42090	42090	yes	10	(5,11]	yes	no	yes	yes	yes	yes	yes	no	no	elevated	elevated	normal
40487	2009-11-24	male	4.44	no crowding	inside	inside	no Hep A				2	[0,5]	yes	no	no	no	no	no	yes	yes	no	elevated	elevated	normal
60050	2006-09-12	male	4.64	crowding	outside	inside	Hep A	8680	8680	yes	3	[0,5]	yes	no	yes	yes	yes	yes	yes	yes	no	elevated	elevated	elevated
50500	2010-01-15	male	0.06	crowding	inside	inside	no Hep A				23	>11	yes	no	no	yes	no	no	no	no	no	elevated	normal	elevated
47446	2009-09-23	male	8.61	crowding	outside	inside	Hep A				3	[0,5]	yes	no	yes	yes	yes	yes	yes	yes	no	elevated	elevated	elevated
40299	2008-11-18	male	4.49	crowding	inside	inside	Hep A						yes	yes	yes	yes	yes	yes	yes	yes	no	elevated	elevated	elevated
67297	2008-11-11	male	10.15	no crowding	inside	outside	Hep A				8	(5,11]	yes	no	yes	yes	yes	yes	yes	yes	no	elevated	elevated	elevated
40179	2007-10-22	male	7.45	no crowding	outside	inside	Hep A	8067	8067	yes	1	[0,5]	yes	yes	yes	yes	yes	yes	yes	no	no	elevated	elevated	elevated
60480	2009-11-11	male	7.61	no crowding	outside	outside	Hep A				3	[0,5]	yes	no	no	no	yes	no	no	yes	no	elevated	elevated	elevated
63154	2007-09-10	male	5.81	no crowding	inside	inside	Hep A	6704	6704	yes	8	(5,11]	yes	no	no	yes	yes	yes	yes	no	no	elevated	elevated	elevated
40292	2008-10-25	male	10.32	crowding	outside	outside	Hep A				5	[0,5]	yes	no	no	no	no	no	yes	yes	no	elevated	elevated	elevated
61065	2006-10-20	male	10.55	crowding	outside	outside	Hep A	3451	3451	yes	3	[0,5]	yes	no	no	yes	no	yes	yes	yes	no	elevated	elevated	elevated
66230	2008-04-15	male	4.31	crowding	inside	inside	Hep A	9322	9322	yes	4	[0,5]	yes	no	yes	yes	yes	yes	yes	yes	no	elevated	elevated	elevated
54094	2007-02-08	male	7.55	no crowding	inside	inside	Hep A	8542	8542	yes	3	[0,5]	yes	yes	yes	yes	yes	no	yes	yes	no	elevated	elevated	elevated
43338	2009-03-25	male	12.32	no crowding	outside	inside	Hep A				3	[0,5]	yes	no	yes	yes	yes	no	yes	yes	no	elevated	elevated	elevated
60087	2007-01-23	male	8.67	no crowding	inside	inside	Hep A	6491	6491	yes	3	[0,5]	yes	yes	yes	yes	yes	yes	yes	yes	no	elevated	elevated	elevated
40320	2009-02-20	male	4.66	no crowding	outside	inside	Hep A				4	[0,5]	yes	no	no	no	yes	yes	no	yes	no	elevated	elevated	normal
42327	2009-03-23	male	8.21	crowding	outside	inside	no Hep A				2	[0,5]	yes	no	yes	yes	yes	yes	no	no	no	elevated	elevated	elevated
60289	2008-10-27	male	11.2	no crowding	inside	inside	Hep A				7	(5,11]	yes	yes	yes	no	yes	yes	yes	yes	no	elevated	elevated	elevated
62432	2009-09-16	male	7.83	crowding	outside	inside	no Hep A				2	[0,5]	yes	no	yes	yes	yes	yes	yes	yes	no	elevated	elevated	elevated
43460	2009-10-13	male	9.17	crowding	inside	inside	Hep A				1	[0,5]	yes	no	no	no	no	yes	yes	yes	no	elevated	elevated	elevated
63396	2009-07-22	male	5.17	crowding	inside	inside	Hep A				17	>11	yes	yes	yes	yes	yes	yes	yes	no	no	elevated	elevated	elevated
40377	2009-06-01	male	6.28	crowding	inside	inside	no Hep A				12	>11	yes	no	yes	no	yes	yes	no	yes	no	elevated	normal	elevated
66274	2008-09-22	male	11.12	no crowding	inside	inside	Hep A				9	(5,11]	yes	no	yes	no	yes	yes	yes	yes	no	elevated	elevated	elevated
60093	2007-02-08	male	10.19	no crowding	inside	inside	Hep A	4020	4020	yes	1	[0,5]	yes	no	no	yes	yes	yes	yes	yes	no	elevated	elevated	elevated
40314	2009-02-04	male	54.41	no crowding	outside	inside	no Hep A				10	(5,11]	yes	yes	no	yes	no	yes	no	yes	no	elevated	elevated	elevated
55516	2010-01-26	male	6.15	no crowding	outside	inside	Hep A				3	[0,5]	yes	no	no	yes	yes	yes	yes	yes	no	elevated	elevated	elevated
64058	2006-09-28	male	7.05	crowding	outside	inside	Hep A	9190	9190	yes	1	[0,5]	yes	no	no	yes	yes	yes	no	yes	no	elevated	elevated	elevated
60296	2008-11-11	male	8.19	no crowding	inside	inside	Hep A				24	>11	yes	no	yes	yes	no	yes	no	yes	no	elevated	elevated	elevated
50380	2009-06-01	male	10.03	no crowding	inside	inside	Hep A				11	(5,11]	no	no	no	yes	no	yes	yes	yes	no	elevated	elevated	elevated
43286	2008-10-23	male	17.42	crowding	inside	inside	no Hep A				3	[0,5]	yes	no	no	no	no	yes	no	yes	yes	elevated	normal	elevated
40541	2010-03-02	male	2.92	crowding	outside	outside	Hep A				4	[0,5]	yes	no	yes	yes	no	yes	no	no	no	elevated	elevated	elevated
60125	2007-03-24	male	7.2	crowding	outside	outside	Hep A	32700	32700	yes	4	[0,5]	yes	yes	no	yes	yes	yes	yes	yes	no	elevated	elevated	elevated
60075	2006-11-16	male	42.98	no crowding	outside	inside	no Hep A	4293	4293	yes	319	>11	yes	no	no	no	no	no	no	no	no	elevated	elevated	elevated
52315	2009-02-05	male	3.3	crowding	inside	inside	Hep A				8	(5,11]	yes	yes	yes	no	no	yes	yes	yes	no	elevated	elevated	elevated
65237	2008-05-19	male	6.23	crowding	inside	inside	Hep A	38300	38300	yes	4	[0,5]	yes	yes	yes	yes	yes	yes	yes	yes	no	elevated	elevated	elevated
50522	2010-02-01	male	6.03	no crowding	inside	inside	Hep A				9	(5,11]	yes	yes	yes	yes	yes	yes	yes	yes	no	elevated	elevated	elevated
66081	2006-11-16	male	6.25	no crowding	inside	inside	Hep A	44520	44520	yes	2	[0,5]	yes	no	no	yes	yes	yes	yes	yes	no	elevated	elevated	elevated
66202	2008-01-21	male	11.9	no crowding	outside	inside	Hep A	7993	7993	yes	3	[0,5]	yes	no	yes	yes	yes	yes	yes	yes	no	elevated	elevated	elevated
41267	2008-09-02	male	52.02	no crowding	inside	inside	no Hep A				11	(5,11]	yes	no	yes	yes	no	yes	yes	yes	no	elevated	elevated	elevated
63055	2006-09-03	male	43.42	no crowding	inside	inside	no Hep A	23190	23190	yes	2	[0,5]	no	no	no	no	yes	no	yes	yes	no	elevated	elevated	normal
63090	2007-02-06	male	6.34	no crowding	inside	inside	Hep A	2627	2627	yes	5	[0,5]	yes	yes	yes	yes	yes	yes	no	yes	no	elevated	elevated	elevated
60554	2010-03-11	male	4.42	crowding	outside	outside	Hep A				6	(5,11]	yes	no	no	yes	yes	yes	yes	yes	no	elevated	elevated	elevated
41152	2007-09-04	male	2.72	crowding	outside	inside	Hep A	38340	38340	yes	3	[0,5]	yes	no	yes	yes	no	yes	yes	yes	no	elevated	elevated	elevated
42435	2009-09-18	male	8.1	crowding	inside	inside	no Hep A				2	[0,5]	yes	no	no	no	no	yes	no	yes	no	elevated	elevated	elevated
50421	2009-08-31	male	4.49	no crowding	inside	inside	Hep A				4	[0,5]	yes	yes	yes	no	yes	no	yes	yes	no	elevated	elevated	elevated
60493	2009-12-03	male	3.55	crowding	inside	inside	no Hep A				2	[0,5]	yes	no	no	no	no	no	yes	yes	no	elevated	elevated	elevated
44542	2010-03-02	male	10.6	crowding	inside	inside	no Hep A				2	[0,5]	yes	no	yes	yes	yes	yes	yes	yes	no	elevated	elevated	elevated
40295	2008-11-11	male	3.6	crowding	inside	inside	Hep A				7	(5,11]	yes	yes	yes	yes	yes	no	yes	yes	no	elevated	elevated	elevated
61031	2006-08-07	male	4.85	no crowding	outside	outside	Hep A	7748	7748	yes	2	[0,5]	yes	no	yes	yes	yes	no	yes	no	no	elevated	elevated	elevated
47079	2006-11-24	male	5.93	crowding	outside	inside	Hep A	8830	8830	yes	4	[0,5]	yes	no	no	no	no	yes	yes	yes	no	elevated	elevated	elevated
41137	2007-06-04	male	7.89	crowding	inside	inside	Hep A	6717	6717	yes			yes	no	yes	yes	yes	yes	no	yes	no	elevated	elevated	elevated
52301	2008-11-21	male	3.84	crowding	outside	inside	Hep A				6	(5,11]	yes	yes	yes	no	yes	no	no	no	no	elevated	elevated	elevated
41188	2007-11-11	male	9.54	crowding	outside	inside	Hep A	39950	39950	yes	2	[0,5]	yes	no	yes	yes	yes	yes	yes	yes	no	elevated	elevated	elevated
61047	2006-09-06	male	6.18	crowding	outside	outside	Hep A	53220	53220	yes	5	[0,5]	no	no	no	yes	yes	yes	yes	yes	no	elevated	elevated	elevated
41551	2010-03-08	male	4.18	no crowding	outside	inside	Hep A				4	[0,5]	yes	yes	no	no	yes	no	yes	yes	no	elevated	elevated	elevated
50459	2009-10-13	male	3.44	crowding	inside	inside	Hep A				2	[0,5]	yes	no	no	no	yes	yes	yes	yes	no	elevated	elevated	elevated
50512	2010-01-25	male	2.37	crowding	outside	inside	Hep A				1	[0,5]	yes	no	yes	no	yes	no	yes	yes	no	elevated	elevated	normal
63118	2007-03-20	male	10.59	no crowding	outside	outside	Hep A	5505	5505	yes	3	[0,5]	yes	yes	no	yes	no	yes	no	yes	no	elevated	elevated	elevated
63557	2010-03-12	male	7.7	no crowding	inside	inside	Hep A				2	[0,5]	yes	no	yes	yes	no	yes	yes	yes	no	elevated	elevated	elevated
60534	2010-02-16	male	8.32	crowding	outside	outside	Hep A				5	[0,5]	yes	no	no	yes	yes	yes	no	yes	no	elevated	elevated	elevated
51324	2009-03-05	male	14.32	no crowding	inside	inside	Hep A				7	(5,11]	yes	yes	yes	no	no	yes	yes	yes	no	elevated	elevated	elevated
40323	2009-03-03	male	0.62	crowding	inside	inside	no Hep A				2	[0,5]	yes	no	no	yes	yes	yes	no	yes	yes	elevated	elevated	elevated
50095	2007-02-08	male	8.33	crowding	inside	inside	Hep A	8095	8095	yes	2	[0,5]	yes	yes	yes	yes	yes	yes	yes	yes	no	elevated	elevated	elevated
62024	2006-08-01	male	20.74	no crowding	inside	inside	Hep A	6621	6621	yes	5	[0,5]	yes	yes	yes	yes	yes	yes	yes	yes	no	elevated	elevated	elevated
60216	2008-03-07	male	25.85	crowding	inside	inside	no Hep A	2028	2028	yes	5	[0,5]	yes	no	yes	yes	no	yes	no	yes	no	elevated	elevated	elevated
61264	2008-08-22	male	15.65	no crowding	inside	inside	Hep A				4	[0,5]	yes	no	yes	no	yes	yes	no	yes	no	elevated	elevated	elevated
40326	2009-02-12	male	9.86	no crowding	outside	outside	Hep A						yes	no	yes	no	yes	yes	yes	yes	no	elevated	elevated	elevated
40419	2009-08-28	male	7.33	crowding	outside	outside	Hep A				4	[0,5]	yes	no	no	yes	yes	yes	yes	yes	no	elevated	elevated	elevated
43205	2008-02-05	male	6.33	no crowding	inside	inside	Hep A	8702	8702	yes	6	(5,11]	yes	yes	yes	yes	yes	yes	yes	yes	no	elevated	elevated	elevated
40234	2008-04-28	male	7.46	crowding	inside	inside	Hep A	9163	9163	yes	4	[0,5]	no	yes	no	yes	yes	no	yes	no	no	elevated	elevated	normal
69144	2007-06-18	male	8.44	crowding	outside	outside	Hep A	9762	9762	yes	8	(5,11]	no	no	no	yes	yes	no	yes	no	no	elevated	elevated	elevated
63513	2010-01-25	male	21.61	no crowding	inside	inside	no Hep A				5	[0,5]	yes	yes	no	yes	no	yes	yes	yes	no	elevated	elevated	elevated
40354	2009-04-17	male	12.29	crowding	outside	inside	Hep A				66	>11	yes	no	yes	no	yes	no	no	yes	no	elevated	elevated	elevated
45415	2009-08-27	male	8.48	crowding	inside	inside	Hep A				3	[0,5]	yes	no	no	no	no	yes	yes	yes	no	elevated	elevated	elevated
50041	2006-08-25	male	7.05	no crowding	inside	inside	Hep A	79960	79960	yes	4	[0,5]	yes	yes	yes	yes	yes	yes	yes	yes	no	elevated	elevated	elevated
67291	2008-10-22	male	10.15	no crowding	outside	outside	Hep A				3	[0,5]	yes	yes	yes	yes	yes	yes	yes	yes	no	elevated	elevated	elevated
40258	2008-08-01	male	14.06	no crowding	outside	inside	Hep A	161400	161400	yes	25	>11	yes	no	yes	yes	yes	yes	yes	yes	no	elevated	normal	elevated
50319	2009-02-18	male	8.64	crowding	outside	inside	Hep A						yes	no	no	yes	yes	no	no	yes	no	elevated	elevated	elevated
40275	2008-09-23	male	8.37	no crowding	inside	inside	Hep A				8	(5,11]	yes	yes	no	yes	no	no	yes	yes	no	elevated	elevated	elevated
50057	2006-09-22	male	12.79	no crowding	inside	inside	Hep A	6776	6776	yes	4	[0,5]	yes	no	no	no	yes	yes	yes	yes	no	elevated	elevated	elevated
51537	2010-02-26	male	6.68	no crowding	outside	inside	no Hep A				2	[0,5]	yes	no	no	yes	yes	yes	yes	yes	no	elevated	elevated	elevated
60483	2009-11-19	male	8.39	crowding	inside	inside	no Hep A				7	(5,11]	no	no	yes	no	no	yes	yes	no	no	elevated	elevated	normal
43431	2009-09-16	male	16.79	crowding	inside	inside	Hep A				14	>11	yes	no	no	yes	yes	no	yes	no	no	elevated	elevated	elevated
60476	2009-10-30	male	11.68	no crowding	inside	inside	Hep A				1	[0,5]	yes	no	yes	yes	yes	no	yes	yes	no	elevated	elevated	elevated
50069	2006-10-25	male	13.29	crowding	inside	inside	no Hep A	20750	20750	yes			yes	no	no	yes	yes	yes	yes	yes	no	elevated	elevated	elevated
64331	2009-03-24	male	9.99	crowding	inside	inside	Hep A				4	[0,5]	yes	no	no	yes	yes	yes	yes	yes	yes	elevated	elevated	elevated
47387	2009-06-12	male	9.33	no crowding	outside	inside	no Hep A				4	[0,5]	yes	no	yes	yes	yes	yes	yes	yes	no	elevated	elevated	elevated
60397	2009-07-30	male	0.83	no crowding	outside	outside	no Hep A				3	[0,5]	no	no	yes	no	yes	yes	no	no	no	elevated	elevated	elevated
43413	2009-08-26	male	4.07	crowding	outside	outside	Hep A				4	[0,5]	yes	no	no	yes	yes	yes	yes	yes	no	elevated	elevated	elevated
41165	2007-10-02	male	6.45	no crowding	inside	inside	Hep A	6189	6189	yes	7	(5,11]	yes	yes	yes	yes	yes	yes	yes	yes	no	elevated	elevated	elevated
52470	2009-10-29	male	6.35	crowding	inside	inside	Hep A				19	>11	yes	no	yes	no	yes	yes	yes	yes	no	elevated	elevated	elevated
60357	2009-04-29	male	6.94	crowding	inside	inside	Hep A				40	>11	yes	yes	yes	yes	yes	yes	yes	yes	no	elevated	elevated	elevated
63398	2009-08-05	male	10.23	crowding	inside	inside	Hep A				4	[0,5]	yes	no	no	yes	no	no	yes	no	no	elevated	elevated	elevated
40350	2009-03-30	male	3.56	crowding	outside	outside	Hep A				5	[0,5]	yes	yes	yes	yes	yes	yes	yes	yes	no	elevated	elevated	elevated
43471	2009-10-29	male	7.49	no crowding	inside	inside	Hep A				9	(5,11]	yes	no	no	no	yes	yes	yes	yes	no	elevated	elevated	elevated
50053	2006-09-18	male	10.22	no crowding	inside	inside	Hep A	39180	39180	yes	3	[0,5]	yes	no	no	yes	yes	yes	yes	yes	no	elevated	elevated	elevated
50556	2010-03-10	male	4.45	crowding	outside	inside	Hep A				2	[0,5]	yes	no	yes	yes	yes	yes	yes	yes	no	elevated	elevated	normal
50379	2009-06-01	male	5.75	crowding	inside	inside	Hep A				7	(5,11]	yes	no	no	yes	yes	yes	yes	yes	no	elevated	elevated	elevated
60420	2009-08-31	male	8.04	no crowding	outside	inside	Hep A				4	[0,5]	yes	yes	yes	yes	no	yes	yes	yes	no	elevated	elevated	elevated
63130	2007-04-24	male	5.9	no crowding	outside	outside	Hep A	4543	4543	yes	4	[0,5]	yes	yes	yes	yes	yes	yes	yes	yes	no	elevated	elevated	normal
60458	2009-10-12	male	10.03	no crowding	inside	inside	no Hep A				2	[0,5]	yes	no	no	yes	no	yes	yes	yes	no	elevated	normal	normal
50442	2009-09-21	male	1.66	crowding	outside	outside	Hep A				5	[0,5]	yes	yes	yes	yes	no	yes	no	yes	no	elevated	elevated	elevated
43416	2009-08-26	male	6.53	no crowding	inside	inside	Hep A				1	[0,5]	yes	yes	yes	yes	yes	yes	yes	yes	no	elevated	elevated	elevated
60466	2009-10-22	male	1.8	no crowding	inside	inside	no Hep A				2	[0,5]	yes	no	no	no	no	no	no	no	no	elevated	normal	normal
66181	2007-10-28	male	7.87	crowding	inside	inside	Hep A	8574	8574	yes	7	(5,11]	yes	no	yes	yes	yes	yes	yes	no	no	elevated	elevated	elevated
41105	2007-02-27	male	15.5	no crowding	inside	inside	Hep A	7048	7048	yes	2	[0,5]	yes	yes	yes	yes	no	yes	no	yes	no	elevated	elevated	elevated
50496	2010-01-12	male	11.03	crowding	inside	inside	no Hep A				3	[0,5]	yes	no	yes	yes	yes	yes	yes	yes	no	elevated	elevated	elevated
43191	2007-11-27	male	6.43	no crowding	inside	inside	Hep A	8912	8912	yes	8	(5,11]	yes	no	yes	no	no	yes	yes	yes	no	elevated	elevated	elevated
61115	2007-03-09	male	6.88	crowding	inside	inside	Hep A	8961	8961	yes			yes	no	no	yes	no	yes	no	yes	no	elevated	elevated	elevated
61451	2009-10-01	male	3.46	crowding	outside	outside	Hep A				30	>11	yes	yes	no	yes	yes	yes	yes	yes	no	elevated	elevated	normal
66448	2009-09-29	male	4.49	no crowding	inside	inside	Hep A				11	(5,11]	yes	no	no	no	yes	yes	yes	no	no	elevated	elevated	normal
66255	2008-07-24	male	4.76	crowding	outside	inside	Hep A	8022	8022	yes	2	[0,5]	yes	no	yes	no	no	yes	no	yes	no	elevated	elevated	elevated
50111	2007-03-12	male	6.94	no crowding	inside	inside	Hep A	8447	8447	yes	1	[0,5]	yes	yes	yes	yes	yes	no	yes	yes	no	elevated	elevated	elevated
66245	2008-06-26	male	5.49	no crowding	outside	inside	Hep A	8802	8802	yes	1	[0,5]	no	no	no	yes	yes	no	yes	yes	no	elevated	elevated	elevated
66186	2007-11-07	male	4.02	crowding	inside	inside	Hep A	7982	7982	yes	2	[0,5]	yes	no	yes	yes	yes	yes	no	yes	no	elevated	elevated	elevated
43526	2010-02-05	male	6.59	no crowding	outside	inside	no Hep A				3	[0,5]	yes	no	no	no	yes	yes	yes	yes	no	elevated	normal	elevated
63072	2006-11-10	male	20.3	no crowding	inside	inside	Hep A	8011	8011	yes	39	>11	yes	yes	yes	yes	yes	yes	yes	yes	no	elevated	elevated	elevated
43325	2009-03-12	male	19.23	crowding	outside	inside	Hep A				6	(5,11]	yes	no	no	no	yes	yes	yes	yes	no	elevated	elevated	elevated
44217	2008-03-12	male	8.29	crowding	outside	inside	Hep A	3408	3408	yes	3	[0,5]	yes	yes	no	yes	yes	yes	yes	no	no	elevated	elevated	elevated
60336	2009-03-25	male	5.45	no crowding	inside	inside	Hep A				3	[0,5]	yes	no	yes	yes	yes	yes	yes	yes	no	elevated	elevated	elevated
51073	2006-11-09	male	11.35	crowding	outside	inside	Hep A	8243	8243	yes	4	[0,5]	yes	no	yes	yes	yes	yes	yes	yes	no	elevated	elevated	elevated
60268	2008-09-08	male	2.85	crowding	inside	inside	no Hep A				8	(5,11]	yes	no	yes	no	no	no	no	yes	yes	elevated	elevated	elevated
40012	2006-07-10	male	9.37	crowding	outside	inside	Hep A	9248	9248	yes	4	[0,5]	yes	yes	yes	yes	yes	yes	yes	yes	no	elevated	elevated	elevated
60450	2009-09-30	male	5.08	crowding	inside	inside	Hep A				8	(5,11]	yes	no	no	no	no	no	yes	yes	no	elevated	elevated	elevated
40495	2010-01-12	male	17.5	crowding	outside	inside	no Hep A				10	(5,11]	yes	no	no	no	no	no	no	no	no	elevated	normal	elevated
66166	2007-10-08	male	3.42	no crowding	inside	inside	Hep A	3727	3727	yes	6	(5,11]	yes	yes	yes	yes	yes	yes	yes	yes	no	elevated	elevated	elevated
40436	2009-09-18	male	4.59	crowding	outside	outside	no Hep A				3	[0,5]	yes	no	no	yes	yes	yes	yes	yes	no	elevated	normal	elevated
66348	2009-03-30	male	10.08	crowding	inside	inside	no Hep A				15	>11	yes	yes	no	yes	yes	yes	yes	yes	no	elevated	normal	elevated
40384	2009-06-09	male	7.18	crowding	inside	inside	no Hep A				2	[0,5]	yes	no	no	no	yes	yes	yes	yes	no	elevated	elevated	elevated
51334	2009-03-25	male	6.51	no crowding	inside	inside	Hep A				52	>11	yes	yes	yes	no	yes	no	yes	yes	no	elevated	elevated	elevated
40260	2008-08-05	male	15.26	crowding	outside	inside	no Hep A	1016	1016	yes	16	>11	yes	yes	yes	yes	yes	yes	yes	yes	no	elevated	elevated	elevated
43238	2008-05-19	male	11.66	crowding	inside	inside	Hep A	5061	5061	yes	8	(5,11]	yes	yes	yes	yes	yes	yes	yes	yes	no	elevated	elevated	elevated
61078	2006-11-20	male	12.51	crowding	outside	inside	Hep A	9535	9535	yes	4	[0,5]	yes	no	no	yes	yes	no	yes	yes	no	elevated	elevated	elevated
62391	2009-07-02	male	9.49	no crowding	inside	inside	no Hep A				1	[0,5]	yes	no	no	no	no	yes	yes	no	no	elevated	normal	normal
50403	2009-08-12	male	8.22	no crowding	inside	inside	no Hep A				3	[0,5]	yes	yes	yes	no	yes	yes	yes	yes	no	elevated	normal	elevated
40277	2008-10-06	male	6.09	crowding	inside	inside	Hep A				2	[0,5]	yes	no	yes	yes	yes	yes	no	yes	no	elevated	elevated	elevated
61035	2006-08-11	male	3.93	crowding	outside	outside	Hep A	7741	7741	yes	2	[0,5]	yes	no	no	yes	yes	no	yes	yes	no	elevated	elevated	normal
50434	2009-09-16	male	13.87	crowding	inside	inside	no Hep A				13	>11	yes	no	no	no	yes	yes	yes	yes	no	elevated	normal	elevated
51046	2006-09-01	male	9.57	no crowding	outside	inside	Hep A	8090	8090	yes	9	(5,11]	yes	yes	yes	yes	yes	yes	yes	yes	no	elevated	elevated	elevated
47086	2007-01-20	male	11.67	no crowding	inside	inside	Hep A	6667	6667	yes	1	[0,5]	yes	no	yes	no	yes	yes	yes	yes	no	elevated	elevated	elevated
47127	2007-03-28	male	31.91	crowding	outside	inside	no Hep A	9656	9656	yes	4	[0,5]	yes	no	no	no	no	no	yes	yes	no	elevated	elevated	elevated
66098	2007-02-06	male	4.45	no crowding	inside	inside	Hep A	60390	60390	yes	1	[0,5]	yes	no	yes	yes	yes	no	no	yes	no	elevated	elevated	elevated
43169	2007-10-09	male	11.99	no crowding	outside	inside	Hep A	8777	8777	yes	6	(5,11]	yes	yes	yes	yes	yes	no	yes	no	no	elevated	elevated	elevated
63452	2009-10-01	male	4.15	crowding	inside	inside	no Hep A				2	[0,5]	yes	no	no	yes	yes	yes	yes	yes	no	elevated	elevated	elevated
66428	2009-09-04	male	3.34	crowding	inside	inside	no Hep A				2	[0,5]	yes	no	no	no	yes	yes	yes	yes	no	elevated	elevated	elevated
66183	2007-10-30	male	2.67	crowding	inside	inside	Hep A	32860	32860	yes	8	(5,11]	yes	yes	yes	no	yes	yes	no	yes	no	elevated	elevated	elevated
62243	2008-06-19	male	3.38	no crowding	inside	inside	Hep A	8571	8571	yes	4	[0,5]	yes	yes	no	yes	no	yes	yes	yes	no	elevated	elevated	elevated
60399	2009-08-11	male	4.05	no crowding	outside	outside	Hep A				3	[0,5]	yes	yes	yes	no	no	yes	no	yes	no	elevated	elevated	elevated
44366	2009-05-12	male	3.01	crowding	outside	inside	no Hep A				4	[0,5]	yes	yes	yes	yes	no	yes	yes	yes	no	elevated	elevated	elevated
40548	2010-03-05	male	5.38	no crowding	inside	inside	Hep A				3	[0,5]	yes	no	no	yes	no	no	yes	yes	no	elevated	elevated	elevated
41064	2006-10-19	male	44.15	crowding	inside	inside	no Hep A	933	933	yes	10	(5,11]	yes	no	yes	yes	yes	yes	yes	yes	no	elevated	elevated	elevated
66156	2007-09-13	male	9.45	no crowding	inside	inside	Hep A	6493	6493	yes	5	[0,5]	yes	yes	no	yes	yes	yes	yes	yes	no	elevated	elevated	elevated
47411	2009-08-21	male	5.03	no crowding	outside	outside	Hep A				3	[0,5]	yes	no	yes	no	no	yes	yes	no	no	elevated	elevated	elevated
50001	2006-05-02	male	3.1	crowding	outside	inside	Hep A	7486	7486	yes	5	[0,5]	yes	no	yes	yes	yes	yes	yes	yes	no	elevated	elevated	elevated
60545	2010-03-04	male	3.91	no crowding	inside	inside	no Hep A				4	[0,5]	yes	no	no	no	no	yes	yes	yes	no	elevated	elevated	elevated
63203	2008-01-21	male	7.01	crowding	inside	inside	Hep A	6439	6439	yes	6	(5,11]	yes	no	no	no	yes	no	yes	yes	no	elevated	elevated	elevated
50333	2009-03-25	male	9.95	crowding	outside	outside	no Hep A				4	[0,5]	yes	no	no	yes	no	yes	yes	yes	no	elevated	elevated	elevated
40491	2009-12-02	male	6.15	crowding	outside	inside	Hep A				2	[0,5]	yes	no	yes	no	no	yes	yes	yes	no	elevated	elevated	elevated

## Sheet: table1
uniqueID	age_cat6	sex	hepA_yn	housing	toilets	water	jaundice	pale_stool	dark_urin	nausea	vomiting	fever	anorexic	malaise	got_cat	gpt_cat	bt_cat
66167	(5,10]	female	Hep A	crowding	outside	inside	yes	no	no	yes	yes	yes	yes	yes	normal	normal	normal
47369	(5,10]	female	no Hep A	no crowding	outside	outside	yes	no	no	yes	yes	yes	yes	yes	normal	normal	normal
41400	(5,10]	female	no Hep A	no crowding	inside	inside	yes	yes	no	yes	yes	yes	yes	yes	normal	normal	elevated
40330	(5,10]	female	no Hep A	crowding	outside	outside	no	yes	yes	no	yes	yes	yes	yes	normal	normal	elevated
63383	(1,5]	female	Hep A	no crowding	inside	inside	yes	yes	yes	yes	yes	yes	yes	yes	normal	normal	normal
40463	(18,Inf]	female	no Hep A	no crowding	inside	inside	no	no	no	no	no	no	no	no	normal	normal	normal
60017	(18,Inf]	female	no Hep A	no crowding	inside	inside	yes	no	no	yes	no	no	yes	yes	normal	normal	normal
66256	(1,5]	female	no Hep A	no crowding	outside	inside	yes	no	yes	no	no	yes	yes	yes	normal	normal	normal
40429	(5,10]	female	no Hep A	no crowding	outside	inside	yes	no	no	yes	yes	yes	yes	yes	normal	normal	normal
63250	(18,Inf]	female	no Hep A	no crowding	inside	inside	no	no	no	yes	no	no	no	yes	normal	normal	normal
42444	(18,Inf]	female	no Hep A	no crowding	inside	inside	no	no	no	yes	no	yes	yes	yes	normal	normal	normal
60360	(5,10]	female	no Hep A	no crowding	inside	inside	no	no	no	no	no	yes	no	yes	normal	normal	normal
63223	(18,Inf]	female	no Hep A	no crowding	inside	inside	yes	no	no	yes	no	no	yes	yes	normal	elevated	normal
50010	(5,10]	female	no Hep A	no crowding	outside	outside	no	no	yes	yes	yes	yes	yes	yes	normal	normal	normal
40132	(18,Inf]	female	no Hep A	no crowding	inside	inside	no	no	no	yes	no	no	no	no	normal	normal	normal
54077	(10,14]	female	no Hep A	no crowding	outside	inside	yes	no	no	yes	yes	no	yes	yes	normal	normal	normal
44007	(18,Inf]	female	no Hep A	no crowding	outside	outside	yes	no	no	yes	no	yes	yes	yes	normal	normal	elevated
60533	(18,Inf]	female	no Hep A	no crowding	inside	inside	no	no	no	yes	yes	no	no	no	normal	normal	normal
63074	(18,Inf]	female	no Hep A	no crowding	inside	inside	no	no	no	yes	no	yes	no	yes	normal	normal	normal
51009	(10,14]	female	Hep A	crowding	outside	inside	yes	no	yes	yes	yes	yes	yes	yes	normal	normal	normal
60521	(18,Inf]	female	no Hep A	no crowding	inside	inside	no	no	no	no	no	no	no	no	normal	elevated	normal
61026	(1,5]	female	Hep A	crowding	inside	outside	yes	yes	yes	yes	yes	yes	yes	yes	normal	normal	normal
610108	(18,Inf]	female	no Hep A	crowding	outside	outside	yes	no	no	yes	yes	no	no	yes	normal	normal	normal
60198	(18,Inf]	female	no Hep A	no crowding	inside	inside	no	yes	no	no	no	no	no	no	normal	normal	elevated
43294	(1,5]	female	no Hep A	crowding	outside	inside	yes	no	yes	yes	no	no	yes	yes	normal	normal	elevated
41519	(18,Inf]	female	no Hep A	no crowding	inside	inside	yes	no	no	no	no	no	yes	no	normal	normal	normal
63003	(1,5]	female	no Hep A	no crowding	inside	inside	yes	no	no	yes	yes	yes	no	yes	normal	normal	normal
43206	(18,Inf]	female	no Hep A	no crowding	inside	inside	yes	no	no	yes	yes	yes	yes	yes	normal	normal	normal
43155	(5,10]	female	no Hep A	crowding	inside	inside	yes	no	yes	yes	yes	yes	yes	no	normal	normal	normal
43189	(14,18]	female	no Hep A	no crowding	inside	inside	yes	no	no	no	no	yes	no	yes	normal	normal	normal
60060	(18,Inf]	female	no Hep A	crowding	inside	inside	yes	no	no	yes	no	yes	no	yes	normal	normal	normal
61034	(18,Inf]	female	no Hep A	crowding	outside	outside	yes	no	no	no	yes	no	yes	yes	normal	normal	normal
66441	(5,10]	female	Hep A	no crowding	inside	inside	yes	no	no	yes	yes	yes	yes	yes	normal	elevated	elevated
50193	(14,18]	female	no Hep A	no crowding	inside	inside	yes	no	yes	yes	yes	yes	yes	yes	normal	normal	normal
69511	(1,5]	female	no Hep A	no crowding	outside	outside	yes	no	no	yes	yes	yes	yes	yes	normal	normal	normal
40257	(5,10]	female	Hep A	no crowding	outside	inside	yes	no	yes	yes	yes	no	yes	yes	normal	elevated	elevated
40140	(18,Inf]	female	no Hep A	no crowding	inside	inside	no	no	no	yes	no	no	yes	yes	normal	normal	normal
60465	(18,Inf]	female	no Hep A	no crowding	inside	inside	yes	no	no	yes	yes	yes	no	yes	normal	normal	normal
60437	(10,14]	female	no Hep A	no crowding	inside	inside	yes	no	no	yes	yes	yes	yes	yes	normal	normal	elevated
61036	(18,Inf]	female	Hep A	no crowding	inside	inside	yes	no	yes	yes	no	yes	yes	yes	normal	normal	normal
66163	(5,10]	female	no Hep A	no crowding	inside	inside	yes	yes	no	no	yes	yes	yes	yes	normal	normal	normal
66249	(5,10]	female	no Hep A	no crowding	outside	inside	no	no	yes	yes	yes	yes	yes	yes	normal	normal	normal
40279	(18,Inf]	female	no Hep A	no crowding	outside	outside	no	no	no	no	no	no	no	no	normal	normal	elevated
50061	(5,10]	female	no Hep A	crowding	inside	inside	yes	no	no	yes	no	yes	yes	yes	normal	normal	normal
40498	(18,Inf]	female	no Hep A	no crowding	inside	inside	yes	no	no	no	no	no	yes	yes	normal	normal	normal
60536	(10,14]	female	no Hep A	no crowding	inside	inside	no	no	no	no	yes	yes	yes	yes	normal	normal	normal
41339	(5,10]	female	no Hep A	crowding	outside	inside	yes	yes	yes	yes	yes	yes	yes	yes	normal	normal	elevated
66195	(5,10]	female	no Hep A	no crowding	inside	inside	yes	no	no	yes	yes	no	yes	yes	normal	normal	normal
60362	(5,10]	female	Hep A	crowding	outside	inside	yes	no	yes	yes	no	yes	yes	yes	normal	normal	elevated
66160	(5,10]	female	Hep A	no crowding	inside	inside	yes	yes	yes	yes	no	yes	no	no	normal	normal	normal
50240	(18,Inf]	female	no Hep A	no crowding	inside	inside	yes	no	no	yes	yes	no	yes	yes	normal	normal	elevated
64147	(0,1]	female	no Hep A	no crowding	outside	outside	yes	no	yes	no	no	yes	no	yes	normal	normal	normal
41321	(1,5]	female	no Hep A	no crowding	inside	inside	yes	no	no	yes	yes	yes	yes	yes	normal	normal	normal
66168	(5,10]	female	no Hep A	crowding	outside	inside	yes	no	no	yes	no	yes	yes	yes	normal	normal	elevated
6018	(10,14]	female	no Hep A	no crowding	inside	inside	yes	yes	yes	no	yes	yes	yes	yes	normal	normal	elevated
52342	(1,5]	female	no Hep A	crowding	outside	inside	yes	no	no	yes	no	no	yes	yes	normal	normal	elevated
60126	(18,Inf]	female	no Hep A	crowding	outside	outside	yes	no	no	yes	no	yes	yes	yes	normal	normal	normal
54076	(18,Inf]	female	no Hep A	no crowding	outside	inside	yes	no	no	yes	no	yes	no	no	normal	normal	normal
62113	(18,Inf]	female	no Hep A	no crowding	inside	inside	no	no	no	yes	no	yes	no	yes	normal	normal	normal
44006	(5,10]	female	no Hep A	no crowding	inside	inside	no	no	yes	yes	yes	no	yes	yes	normal	normal	elevated
47088	(18,Inf]	female	no Hep A	no crowding	outside	inside	yes	no	yes	no	no	yes	yes	yes	normal	normal	elevated
60514	(1,5]	female	no Hep A	no crowding	inside	inside	yes	no	no	no	yes	yes	yes	yes	normal	normal	normal
43497	(5,10]	female	no Hep A	crowding	inside	inside	yes	no	no	no	yes	yes	yes	yes	normal	normal	normal
40453	(0,1]	female	no Hep A	crowding	inside	inside	yes	no	no	yes	yes	yes	yes	yes	normal	normal	elevated
40229	(1,5]	female	Hep A	no crowding	outside	inside	yes	yes	yes	yes	yes	yes	yes	yes	normal	normal	elevated
43194	(18,Inf]	female	no Hep A	no crowding	inside	inside	yes	no	no	yes	no	yes	yes	yes	normal	normal	normal
61027	(1,5]	female	Hep A	crowding	outside	inside	yes	yes	yes	no	no	yes	no	no	normal	normal	elevated
41454	(5,10]	female	Hep A	crowding	inside	inside	yes	no	no	yes	no	yes	yes	yes	normal	normal	normal
60378	(18,Inf]	female	no Hep A	no crowding	inside	inside	yes	no	no	yes	no	no	yes	yes	normal	normal	elevated
61025	(5,10]	female	no Hep A	crowding	outside	outside	yes	no	yes	yes	yes	yes	yes	yes	normal	normal	normal
60085	(10,14]	female	no Hep A	crowding	outside	inside	yes	no	no	yes	yes	yes	yes	yes	normal	normal	normal
60084	(5,10]	female	Hep A	crowding	outside	inside	yes	no	no	yes	yes	yes	yes	yes	normal	normal	normal
50131	(18,Inf]	female	no Hep A	no crowding	inside	inside	yes	no	no	yes	no	no	no	yes	normal	elevated	normal
40204	(5,10]	female	no Hep A	crowding	outside	inside	yes	no	no	no	no	no	no	yes	normal	normal	elevated
50023	(1,5]	female	Hep A	no crowding	outside	outside	yes	no	yes	yes	yes	no	yes	yes	elevated	elevated	elevated
60535	(10,14]	female	Hep A	no crowding	outside	outside	yes	no	yes	no	yes	yes	no	yes	elevated	elevated	elevated
68438	(5,10]	female	Hep A	no crowding	outside	outside	yes	yes	yes	yes	yes	yes	yes	yes	elevated	elevated	elevated
50066	(5,10]	female	Hep A	crowding	outside	inside	yes	no	yes	no	no	yes	yes	yes	elevated	elevated	normal
40477	(5,10]	female	Hep A	crowding	outside	inside	yes	yes	yes	yes	yes	yes	yes	yes	elevated	elevated	elevated
50303	(1,5]	female	Hep A	crowding	outside	inside	yes	no	no	no	no	yes	yes	yes	elevated	elevated	elevated
52502	(1,5]	female	no Hep A	no crowding	inside	inside	yes	no	no	yes	yes	yes	yes	yes	elevated	elevated	normal
65158	(5,10]	female	Hep A	crowding	outside	inside	yes	no	yes	yes	yes	no	yes	yes	elevated	elevated	elevated
44527	(5,10]	female	Hep A	no crowding	inside	inside	yes	yes	yes	yes	yes	yes	yes	yes	elevated	elevated	elevated
63235	(5,10]	female	Hep A	no crowding	inside	inside	yes	no	no	yes	yes	yes	yes	yes	elevated	elevated	elevated
64479	(5,10]	female	Hep A	crowding	inside	inside	yes	no	no	no	no	yes	yes	yes	elevated	elevated	elevated
60316	(1,5]	female	Hep A	crowding	inside	inside	yes	no	no	no	yes	no	no	yes	elevated	elevated	elevated
41401	(5,10]	female	no Hep A	no crowding	inside	inside	yes	no	no	no	yes	yes	yes	yes	elevated	elevated	elevated
65412	(0,1]	female	Hep A	no crowding	inside	inside	yes	no	yes	no	no	no	yes	no	elevated	elevated	elevated
43364	(5,10]	female	no Hep A	crowding	outside	outside	yes	no	yes	no	yes	no	yes	yes	elevated	normal	elevated
62492	(5,10]	female	Hep A	crowding	outside	inside	yes	yes	yes	no	yes	yes	yes	yes	elevated	elevated	normal
66221	(10,14]	female	Hep A	no crowding	outside	inside	yes	no	no	yes	yes	yes	yes	no	elevated	elevated	elevated
63096	(5,10]	female	Hep A	no crowding	outside	outside	yes	no	no	no	no	yes	yes	yes	elevated	elevated	elevated
61308	(5,10]	female	Hep A	crowding	outside	outside	yes	no	yes	yes	yes	yes	yes	yes	elevated	elevated	elevated
63106	(0,1]	female	no Hep A	no crowding	inside	inside	yes	no	no	no	yes	yes	yes	yes	elevated	elevated	elevated
51457	(1,5]	female	no Hep A	crowding	outside	inside	yes	no	no	yes	yes	no	yes	yes	elevated	normal	elevated
43117	(5,10]	female	Hep A	no crowding	inside	inside	yes	no	no	yes	yes	yes	no	yes	elevated	elevated	elevated
62157	(18,Inf]	female	no Hep A	no crowding	inside	inside	yes	no	yes	no	no	yes	yes	no	elevated	elevated	elevated
65504	(1,5]	female	Hep A	crowding	inside	inside	yes	yes	yes	yes	yes	yes	yes	yes	elevated	elevated	elevated
60114	(5,10]	female	Hep A	no crowding	inside	inside	no	no	no	yes	yes	yes	yes	no	elevated	elevated	elevated
42201	(10,14]	female	Hep A	no crowding	inside	inside	yes	no	no	yes	yes	no	yes	no	elevated	elevated	elevated
43447	(5,10]	female	no Hep A	crowding	outside	inside	yes	no	no	yes	yes	no	yes	yes	elevated	elevated	normal
44209	(5,10]	female	Hep A	no crowding	inside	inside	no	no	no	no	no	yes	no	no	elevated	elevated	elevated
51385	(10,14]	female	no Hep A	no crowding	inside	inside	no	no	no	yes	yes	yes	yes	yes	elevated	elevated	elevated
65365	(10,14]	female	no Hep A	crowding	inside	inside	yes	yes	yes	yes	no	yes	yes	yes	elevated	normal	elevated
41347	(1,5]	female	Hep A	no crowding	inside	inside	yes	no	no	yes	yes	yes	yes	yes	elevated	elevated	elevated
52343	(5,10]	female	Hep A	crowding	outside	outside	yes	yes	yes	yes	no	yes	no	yes	elevated	elevated	elevated
66222	(5,10]	female	Hep A	no crowding	outside	inside	yes	yes	no	yes	yes	yes	yes	yes	elevated	elevated	elevated
51404	(1,5]	female	no Hep A	crowding	inside	inside	yes	yes	yes	yes	yes	yes	yes	yes	elevated	elevated	elevated
60553	(5,10]	female	Hep A	crowding	outside	inside	yes	no	yes	yes	yes	yes	no	yes	elevated	elevated	elevated
64045	(14,18]	female	Hep A	crowding	outside	outside	yes	no	yes	yes	yes	yes	yes	yes	elevated	elevated	elevated
41197	(5,10]	female	Hep A	crowding	inside	inside	yes	no	no	yes	yes	yes	yes	yes	elevated	elevated	normal
41151	(5,10]	female	Hep A	crowding	inside	inside	yes	no	yes	yes	yes	no	yes	yes	elevated	elevated	elevated
60449	(1,5]	female	no Hep A	crowding	inside	inside	yes	no	no	no	no	yes	yes	yes	elevated	elevated	elevated
63091	(5,10]	female	Hep A	crowding	inside	inside	yes	yes	yes	yes	yes	yes	yes	yes	elevated	elevated	elevated
42531	(10,14]	female	no Hep A	crowding	inside	inside	yes	yes	yes	yes	yes	yes	yes	yes	elevated	elevated	elevated
60538	(0,1]	female	no Hep A	crowding	inside	inside	yes	no	no	no	yes	yes	yes	yes	elevated	elevated	elevated
55388	(5,10]	female	Hep A	crowding	outside	outside	yes	no	yes	yes	no	yes	yes	yes	elevated	elevated	elevated
50298	(5,10]	female	Hep A	crowding	inside	inside	yes	yes	yes	yes	no	yes	yes	no	elevated	elevated	elevated
65187	(10,14]	female	Hep A	crowding	inside	inside	yes	no	yes	no	yes	yes	no	yes	elevated	elevated	elevated
47328	(18,Inf]	female	no Hep A	no crowding	outside	inside	yes	no	yes	no	no	yes	no	no	elevated	normal	elevated
50038	(10,14]	female	Hep A	crowding	inside	inside	yes	yes	yes	yes	yes	yes	yes	yes	elevated	elevated	elevated
63104	(5,10]	female	Hep A	no crowding	outside	inside	yes	yes	yes	yes	yes	yes	no	yes	elevated	elevated	elevated
67043	(5,10]	female	Hep A	crowding	outside	inside	yes	no	yes	yes	yes	yes	yes	yes	elevated	elevated	normal
41501	(10,14]	female	no Hep A	no crowding	inside	inside	yes	no	no	yes	no	yes	yes	yes	elevated	elevated	elevated
44508	(5,10]	female	no Hep A	crowding	outside	inside	yes	yes	yes	yes	yes	yes	yes	yes	elevated	normal	normal
60374	(1,5]	female	Hep A	no crowding	inside	inside	yes	no	no	yes	no	no	yes	no	elevated	elevated	elevated
47394	(5,10]	female	no Hep A	no crowding	outside	inside	yes	no	no	yes	yes	yes	yes	yes	elevated	elevated	elevated
43190	(1,5]	female	Hep A	crowding	outside	inside	yes	no	no	yes	yes	yes	yes	yes	elevated	elevated	elevated
42133	(5,10]	female	Hep A	no crowding	outside	inside	yes	no	yes	yes	yes	yes	yes	yes	elevated	elevated	elevated
60288	(1,5]	female	Hep A	crowding	inside	inside	yes	yes	yes	yes	yes	no	yes	yes	elevated	elevated	elevated
44368	(5,10]	female	Hep A	no crowding	inside	inside	yes	no	yes	yes	no	yes	yes	yes	elevated	elevated	elevated
61032	(5,10]	female	Hep A	crowding	outside	outside	yes	no	yes	yes	yes	no	yes	yes	elevated	elevated	elevated
60528	(5,10]	female	Hep A	crowding	inside	inside	yes	no	no	yes	no	yes	yes	yes	elevated	elevated	elevated
63424	(14,18]	female	no Hep A	no crowding	inside	inside	no	no	no	yes	no	yes	yes	yes	elevated	elevated	elevated
40273	(5,10]	female	no Hep A	crowding	inside	inside	yes	no	no	no	yes	yes	yes	yes	elevated	normal	normal
63233	(5,10]	female	Hep A	crowding	outside	inside	yes	no	yes	yes	no	yes	yes	yes	elevated	elevated	elevated
41341	(1,5]	female	no Hep A	no crowding	outside	inside	yes	no	no	no	yes	yes	yes	yes	elevated	elevated	elevated
50518	(5,10]	female	Hep A	crowding	inside	inside	yes	no	no	yes	yes	yes	no	no	elevated	elevated	normal
43410	(5,10]	female	no Hep A	no crowding	outside	inside	yes	no	yes	no	yes	yes	yes	yes	elevated	elevated	elevated
47408	(5,10]	female	Hep A	no crowding	outside	inside	yes	no	yes	no	yes	no	yes	yes	elevated	elevated	elevated
47005	(10,14]	female	Hep A	crowding	outside	outside	yes	no	no	yes	yes	no	yes	yes	elevated	elevated	elevated
64145	(5,10]	female	Hep A	crowding	outside	outside	no	yes	no	yes	yes	yes	yes	yes	elevated	elevated	elevated
40022	(1,5]	female	Hep A	no crowding	outside	outside	yes	yes	yes	yes	yes	yes	yes	yes	elevated	normal	elevated
47269	(5,10]	female	Hep A	crowding	outside	outside	yes	yes	yes	yes	yes	yes	yes	yes	elevated	elevated	elevated
40225	(5,10]	female	Hep A	no crowding	inside	inside	no	yes	no	yes	yes	yes	yes	no	elevated	elevated	elevated
40262	(10,14]	female	Hep A	crowding	outside	outside	yes	no	no	yes	no	yes	yes	yes	elevated	elevated	elevated
62405	(0,1]	female	no Hep A	crowding	outside	outside	yes	yes	yes	no	no	yes	yes	yes	elevated	elevated	elevated
50393	(5,10]	female	Hep A	no crowding	outside	outside	yes	no	no	no	no	yes	no	yes	elevated	elevated	elevated
63176	(5,10]	female	Hep A	crowding	outside	inside	yes	no	yes	yes	yes	no	yes	no	elevated	elevated	elevated
45510	(10,14]	female	no Hep A	crowding	inside	inside	yes	yes	yes	yes	yes	yes	yes	yes	elevated	elevated	elevated
60543	(5,10]	female	Hep A	no crowding	outside	inside	yes	no	no	no	no	no	no	no	elevated	elevated	normal
50525	(5,10]	female	Hep A	crowding	outside	inside	yes	no	no	yes	yes	yes	yes	yes	elevated	elevated	elevated
60381	(5,10]	female	no Hep A	no crowding	inside	inside	yes	yes	yes	yes	yes	yes	yes	yes	elevated	elevated	elevated
60344	(1,5]	female	no Hep A	no crowding	outside	outside	yes	yes	yes	yes	yes	yes	yes	yes	elevated	elevated	elevated
43539	(1,5]	female	no Hep A	crowding	inside	inside	yes	no	yes	yes	yes	yes	yes	yes	elevated	elevated	elevated
52352	(5,10]	female	Hep A	crowding	inside	inside	no	no	no	no	yes	yes	yes	yes	elevated	elevated	elevated
64406	(0,1]	female	no Hep A	crowding	outside	outside	yes	yes	yes	no	yes	yes	yes	yes	elevated	elevated	elevated
60544	(5,10]	female	Hep A	crowding	inside	inside	yes	no	no	no	yes	yes	yes	yes	elevated	elevated	elevated
60312	(5,10]	female	Hep A	no crowding	inside	inside	yes	yes	yes	yes	no	yes	yes	yes	elevated	elevated	elevated
50443	(5,10]	female	Hep A	crowding	outside	outside	yes	no	no	yes	yes	yes	yes	yes	elevated	elevated	elevated
65100	(5,10]	female	Hep A	crowding	outside	inside	yes	no	yes	no	no	yes	yes	yes	elevated	elevated	elevated
56337	(0,1]	female	no Hep A	crowding	outside	outside	yes	no	no	no	yes	yes	yes	yes	elevated	elevated	elevated
40407	(5,10]	female	no Hep A	crowding	inside	inside	yes	yes	yes	no	yes	yes	yes	yes	elevated	elevated	elevated
60486	(18,Inf]	female	no Hep A	crowding	inside	inside	no	no	no	no	no	no	no	no	elevated	elevated	normal
42532	(1,5]	female	no Hep A	crowding	inside	inside	yes	no	no	no	yes	yes	yes	yes	elevated	elevated	elevated
610110	(5,10]	female	Hep A	no crowding	outside	inside	yes	yes	yes	yes	yes	yes	yes	yes	elevated	elevated	elevated
50425	(5,10]	female	Hep A	crowding	inside	inside	no	no	yes	no	yes	yes	yes	yes	elevated	elevated	elevated
65171	(5,10]	female	Hep A	no crowding	inside	inside	yes	no	no	yes	yes	yes	yes	no	elevated	elevated	elevated
66335	(5,10]	female	Hep A	crowding	outside	outside	yes	yes	yes	yes	yes	yes	yes	yes	elevated	elevated	elevated
42332	(5,10]	female	Hep A	no crowding	outside	outside	yes	yes	no	yes	yes	no	yes	yes	elevated	normal	normal
50358	(5,10]	female	Hep A	crowding	outside	inside	yes	no	yes	yes	no	yes	no	yes	elevated	elevated	elevated
50409	(1,5]	female	Hep A	no crowding	outside	inside	yes	no	no	no	no	yes	no	no	elevated	elevated	elevated
54340	(5,10]	female	Hep A	crowding	inside	inside	yes	yes	yes	yes	no	yes	yes	yes	elevated	elevated	elevated
60313	(18,Inf]	female	no Hep A	crowding	inside	inside	yes	yes	yes	yes	no	no	yes	yes	elevated	elevated	elevated
40524	(5,10]	female	Hep A	crowding	outside	outside	yes	yes	yes	yes	yes	yes	yes	yes	elevated	elevated	elevated
66180	(10,14]	female	Hep A	no crowding	outside	inside	yes	no	yes	yes	yes	yes	yes	yes	elevated	elevated	elevated
60293	(5,10]	female	Hep A	crowding	inside	inside	yes	no	no	yes	yes	yes	yes	no	elevated	elevated	elevated
60467	(5,10]	female	Hep A	no crowding	inside	inside	yes	yes	yes	no	no	yes	yes	yes	elevated	elevated	elevated
66178	(5,10]	female	Hep A	no crowding	inside	inside	yes	no	yes	no	no	yes	yes	yes	elevated	elevated	elevated
40351	(5,10]	female	Hep A	crowding	outside	outside	yes	no	yes	yes	no	yes	yes	yes	elevated	elevated	elevated
40134	(10,14]	female	Hep A	crowding	outside	inside	yes	no	yes	yes	yes	yes	yes	yes	elevated	elevated	elevated
51530	(10,14]	female	no Hep A	crowding	outside	inside	yes	no	no	yes	yes	yes	yes	yes	elevated	elevated	elevated
51549	(5,10]	female	Hep A	crowding	inside	inside	no	yes	yes	no	yes	yes	no	yes	elevated	elevated	elevated
62414	(5,10]	female	Hep A	crowding	inside	inside	yes	yes	yes	no	yes	yes	yes	yes	elevated	elevated	elevated
40177	(5,10]	female	Hep A	crowding	outside	inside	yes	no	yes	yes	yes	yes	yes	yes	elevated	elevated	elevated
63013	(1,5]	female	Hep A	crowding	inside	inside	yes	no	yes	no	no	no	yes	yes	elevated	elevated	elevated
63349	(0,1]	female	Hep A	crowding	inside	inside	yes	no	no	no	yes	no	yes	yes	elevated	elevated	elevated
52346	(1,5]	female	no Hep A	no crowding	outside	outside	no	yes	no	yes	yes	yes	yes	yes	elevated	normal	elevated
40213	(5,10]	female	Hep A	crowding	outside	inside	yes	yes	yes	yes	no	yes	no	no	elevated	elevated	elevated
54071	(1,5]	female	Hep A	crowding	inside	inside	yes	no	no	yes	yes	no	yes	no	elevated	elevated	normal
45211	(5,10]	female	Hep A	crowding	inside	inside	yes	no	yes	no	yes	yes	no	yes	elevated	elevated	elevated
60473	(1,5]	female	Hep A	no crowding	inside	inside	yes	no	no	yes	yes	no	yes	no	elevated	elevated	elevated
64146	(5,10]	female	Hep A	crowding	outside	inside	yes	yes	yes	yes	yes	yes	yes	yes	elevated	elevated	elevated
67136	(5,10]	female	Hep A	crowding	outside	inside	yes	yes	yes	yes	yes	yes	yes	yes	elevated	elevated	elevated
65103	(5,10]	female	Hep A	no crowding	inside	inside	yes	yes	yes	yes	yes	yes	yes	yes	elevated	elevated	elevated
52345	(10,14]	female	Hep A	crowding	inside	inside	yes	no	yes	no	yes	no	yes	yes	elevated	elevated	elevated
50226	(1,5]	female	no Hep A	no crowding	outside	outside	yes	yes	yes	yes	yes	yes	yes	yes	elevated	elevated	elevated
60011	(10,14]	female	Hep A	no crowding	inside	inside	yes	no	yes	yes	yes	yes	yes	yes	elevated	elevated	elevated
41164	(5,10]	female	Hep A	crowding	outside	inside	yes	no	no	yes	yes	yes	yes	yes	elevated	elevated	elevated
50422	(5,10]	female	Hep A	crowding	outside	outside	yes	no	no	no	yes	no	yes	yes	elevated	elevated	elevated
65386	(1,5]	female	Hep A	crowding	outside	outside	yes	yes	no	yes	yes	yes	yes	yes	elevated	elevated	elevated
50456	(10,14]	female	Hep A	crowding	outside	inside	yes	no	yes	no	yes	yes	yes	yes	elevated	elevated	elevated
63042	(5,10]	female	Hep A	crowding	outside	inside	yes	yes	yes	no	no	yes	yes	yes	elevated	elevated	elevated
50270	(18,Inf]	female	no Hep A	no crowding	inside	inside	yes	no	yes	no	no	no	yes	no	elevated	elevated	elevated
47373	(1,5]	female	Hep A	crowding	outside	inside	yes	no	no	no	no	yes	no	no	elevated	elevated	elevated
64430	(5,10]	female	Hep A	no crowding	outside	inside	yes	no	yes	yes	yes	yes	yes	yes	elevated	elevated	elevated
64507	(10,14]	female	Hep A	no crowding	inside	inside	yes	no	no	yes	yes	yes	yes	yes	elevated	elevated	elevated
66219	(1,5]	female	Hep A	crowding	outside	inside	yes	no	no	no	no	yes	yes	yes	elevated	elevated	normal
54020	(5,10]	female	Hep A	no crowding	outside	inside	yes	no	no	yes	yes	yes	yes	yes	elevated	elevated	elevated
60307	(1,5]	female	Hep A	crowding	inside	inside	yes	yes	yes	yes	yes	yes	yes	yes	elevated	elevated	elevated
50107	(5,10]	female	Hep A	crowding	outside	inside	yes	no	yes	yes	yes	yes	yes	yes	elevated	elevated	elevated
41485	(18,Inf]	female	no Hep A	no crowding	inside	inside	no	no	yes	yes	yes	yes	yes	yes	elevated	elevated	elevated
64259	(5,10]	female	Hep A	crowding	inside	inside	yes	no	yes	yes	no	no	yes	yes	elevated	elevated	elevated
42490	(0,1]	female	no Hep A	crowding	inside	inside	yes	no	no	no	yes	yes	yes	yes	elevated	elevated	elevated
40215	(5,10]	female	Hep A	crowding	inside	outside	yes	yes	yes	no	yes	yes	yes	yes	elevated	elevated	elevated
42478	(1,5]	female	Hep A	no crowding	outside	inside	no	no	no	yes	yes	no	no	yes	elevated	elevated	elevated
40266	(10,14]	female	Hep A	no crowding	inside	inside	yes	yes	yes	yes	no	no	yes	yes	elevated	elevated	normal
54002	(5,10]	female	Hep A	crowding	inside	inside	no	yes	yes	yes	yes	yes	yes	yes	elevated	elevated	elevated
40139	(5,10]	female	Hep A	no crowding	inside	inside	yes	no	no	yes	yes	no	yes	yes	elevated	elevated	elevated
50282	(10,14]	female	Hep A	no crowding	outside	inside	yes	yes	yes	yes	yes	yes	yes	yes	elevated	elevated	elevated
40212	(1,5]	female	no Hep A	no crowding	outside	outside	yes	yes	yes	yes	no	yes	no	yes	elevated	elevated	elevated
60475	(10,14]	female	no Hep A	no crowding	inside	inside	no	yes	yes	no	yes	yes	yes	yes	elevated	elevated	elevated
51062	(5,10]	female	Hep A	crowding	inside	outside	yes	yes	yes	yes	yes	yes	yes	yes	elevated	elevated	elevated
41375	(18,Inf]	female	no Hep A	no crowding	outside	inside	yes	no	yes	yes	yes	yes	yes	no	elevated	elevated	elevated
60382	(5,10]	female	no Hep A	crowding	outside	outside	yes	yes	yes	yes	no	yes	yes	yes	elevated	normal	normal
47426	(5,10]	female	no Hep A	no crowding	inside	inside	yes	no	no	yes	yes	yes	yes	yes	elevated	elevated	elevated
60499	(18,Inf]	female	no Hep A	no crowding	inside	inside	yes	yes	no	no	yes	yes	yes	yes	elevated	elevated	normal
54044	(5,10]	female	Hep A	no crowding	inside	inside	yes	no	no	yes	yes	yes	yes	yes	elevated	elevated	elevated
41372	(18,Inf]	female	no Hep A	no crowding	inside	inside	yes	no	yes	yes	yes	yes	no	no	elevated	elevated	normal
40208	(5,10]	female	Hep A	crowding	outside	inside	yes	no	yes	yes	no	yes	yes	yes	elevated	elevated	elevated
60016	(14,18]	female	Hep A	no crowding	inside	inside	yes	no	yes	yes	no	yes	yes	yes	elevated	elevated	elevated
40174	(1,5]	female	Hep A	crowding	outside	inside	yes	yes	yes	yes	yes	yes	yes	yes	elevated	elevated	elevated
40559	(10,14]	female	no Hep A	no crowding	outside	outside	yes	no	yes	yes	yes	yes	yes	yes	elevated	elevated	elevated
66509	(1,5]	female	Hep A	crowding	outside	inside	yes	yes	yes	no	no	yes	yes	yes	elevated	elevated	elevated
43317	(10,14]	female	Hep A	crowding	inside	inside	yes	no	yes	yes	yes	yes	yes	no	elevated	elevated	elevated
63175	(5,10]	female	Hep A	crowding	outside	inside	yes	no	no	yes	yes	no	yes	no	elevated	elevated	elevated
63101	(5,10]	female	Hep A	crowding	inside	inside	yes	no	yes	no	yes	yes	yes	yes	elevated	elevated	elevated
40150	(18,Inf]	female	no Hep A	crowding	outside	inside	yes	no	yes	yes	yes	yes	yes	no	elevated	elevated	elevated
66092	(10,14]	female	Hep A	no crowding	inside	inside	yes	yes	yes	yes	yes	yes	yes	yes	elevated	elevated	elevated
40356	(1,5]	female	Hep A	crowding	outside	outside	yes	no	no	yes	yes	yes	no	yes	elevated	elevated	normal
60300	(10,14]	female	Hep A	crowding	outside	inside	yes	no	yes	yes	yes	yes	yes	yes	elevated	elevated	elevated
66440	(5,10]	female	Hep A	crowding	inside	inside	yes	no	no	no	yes	yes	no	yes	elevated	elevated	elevated
67494	(5,10]	female	Hep A	crowding	inside	outside	yes	no	no	yes	yes	yes	yes	yes	elevated	elevated	elevated
30353	(18,Inf]	female	no Hep A	no crowding	inside	inside	yes	no	no	no	yes	no	no	yes	elevated	elevated	elevated
44550	(5,10]	female	Hep A	crowding	outside	inside	yes	no	no	yes	yes	yes	yes	yes	elevated	elevated	elevated
50464	(5,10]	female	Hep A	crowding	outside	inside	yes	no	no	yes	yes	no	yes	yes	elevated	elevated	elevated
40099	(10,14]	female	Hep A	crowding	outside	inside	yes	no	yes	yes	yes	yes	yes	yes	elevated	elevated	elevated
50550	(5,10]	female	Hep A	crowding	inside	inside	yes	no	yes	yes	no	yes	yes	yes	elevated	elevated	elevated
43555	(1,5]	female	Hep A	no crowding	outside	inside	yes	yes	yes	yes	no	yes	yes	yes	elevated	elevated	elevated
64218	(5,10]	female	Hep A	no crowding	inside	inside	yes	no	yes	yes	yes	yes	yes	yes	elevated	elevated	elevated
66468	(5,10]	female	no Hep A	no crowding	inside	inside	no	no	no	yes	yes	no	no	no	elevated	normal	normal
54018	(14,18]	female	Hep A	crowding	outside	inside	yes	no	no	yes	yes	yes	yes	yes	elevated	elevated	elevated
40472	(5,10]	female	no Hep A	crowding	inside	inside	yes	no	no	no	yes	yes	no	yes	elevated	elevated	normal
50469	(18,Inf]	female	no Hep A	no crowding	inside	inside	no	no	no	yes	yes	yes	no	yes	elevated	elevated	normal
47390	(5,10]	female	Hep A	no crowding	inside	inside	yes	no	yes	no	yes	yes	yes	yes	elevated	elevated	elevated
43523	(18,Inf]	female	no Hep A	no crowding	inside	inside	yes	no	no	yes	no	no	yes	yes	elevated	elevated	normal
63517	(1,5]	female	no Hep A	no crowding	inside	inside	yes	no	no	yes	no	yes	yes	yes	elevated	elevated	normal
47054	(5,10]	female	Hep A	crowding	outside	outside	yes	no	no	yes	yes	yes	yes	yes	elevated	elevated	elevated
63097	(5,10]	female	Hep A	no crowding	outside	outside	yes	yes	yes	yes	yes	yes	yes	yes	elevated	elevated	elevated
43063	(5,10]	female	Hep A	crowding	inside	inside	yes	no	no	yes	yes	yes	yes	yes	elevated	elevated	elevated
61033	(18,Inf]	female	no Hep A	crowding	outside	outside	yes	no	no	yes	yes	yes	yes	yes	elevated	normal	normal
51433	(1,5]	female	no Hep A	no crowding	inside	inside	yes	yes	yes	yes	yes	no	yes	yes	elevated	elevated	elevated
40529	(5,10]	female	Hep A	no crowding	outside	inside	yes	yes	no	yes	yes	no	yes	yes	elevated	elevated	elevated
60423	(5,10]	female	Hep A	no crowding	inside	inside	yes	no	no	yes	yes	no	yes	yes	elevated	elevated	elevated
40207	(5,10]	female	Hep A	no crowding	inside	inside	yes	yes	yes	yes	yes	yes	yes	yes	elevated	elevated	elevated
60068	(5,10]	female	Hep A	no crowding	inside	inside	yes	no	no	no	no	yes	no	yes	elevated	elevated	elevated
40304	(5,10]	female	Hep A	crowding	outside	inside	yes	no	yes	yes	yes	yes	yes	no	elevated	elevated	elevated
56329	(1,5]	female	Hep A	crowding	inside	inside	yes	no	no	yes	yes	yes	yes	yes	elevated	elevated	normal
42547	(10,14]	female	no Hep A	crowding	inside	inside	yes	no	no	yes	no	no	yes	yes	elevated	elevated	elevated
40290	(5,10]	female	Hep A	crowding	outside	inside	yes	no	yes	yes	yes	yes	yes	yes	elevated	elevated	elevated
56515	(1,5]	female	no Hep A	crowding	inside	inside	yes	no	no	yes	no	yes	yes	yes	elevated	elevated	normal
40246	(1,5]	female	no Hep A	no crowding	inside	inside	yes	yes	yes	yes	yes	yes	yes	yes	elevated	elevated	normal
60220	(5,10]	female	Hep A	crowding	outside	inside	yes	no	yes	yes	no	yes	no	yes	elevated	elevated	elevated
41251	(18,Inf]	female	Hep A	crowding	outside	inside	yes	no	yes	yes	no	yes	yes	yes	elevated	elevated	elevated
63363	(0,1]	female	no Hep A	no crowding	inside	inside	no	yes	yes	no	yes	yes	yes	yes	elevated	elevated	elevated
50284	(1,5]	female	Hep A	crowding	outside	inside	yes	no	no	no	no	yes	yes	yes	elevated	elevated	elevated
61014	(5,10]	female	Hep A	no crowding	inside	inside	yes	no	yes	yes	yes	no	no	no	elevated	elevated	elevated
40172	(0,1]	male	no Hep A	no crowding	inside	inside	yes	no	no	no	no	no	no	no	normal	normal	normal
66389	(5,10]	male	Hep A	no crowding	inside	inside	yes	no	yes	no	no	yes	yes	yes	normal	normal	normal
54281	(18,Inf]	male	no Hep A	no crowding	inside	inside	yes	no	no	yes	no	no	yes	yes	normal	normal	elevated
60285	(18,Inf]	male	no Hep A	no crowding	inside	inside	no	no	no	yes	no	yes	yes	yes	normal	normal	normal
50241	(5,10]	male	no Hep A	no crowding	inside	inside	yes	yes	yes	yes	no	yes	yes	yes	normal	normal	normal
44170	(18,Inf]	male	no Hep A	no crowding	inside	inside	yes	no	no	no	no	no	no	no	normal	normal	normal
67051	(10,14]	male	no Hep A	crowding	outside	inside	yes	no	yes	no	no	yes	yes	yes	normal	normal	normal
54070	(14,18]	male	no Hep A	crowding	inside	inside	yes	no	no	no	no	yes	yes	yes	normal	normal	elevated
40265	(1,5]	male	no Hep A	crowding	outside	inside	no	no	no	no	no	yes	no	yes	normal	normal	normal
66162	(10,14]	male	Hep A	no crowding	inside	inside	yes	yes	yes	yes	yes	yes	yes	yes	normal	normal	normal
60123	(10,14]	male	no Hep A	crowding	outside	outside	yes	no	no	yes	no	no	yes	yes	normal	normal	normal
41004	(1,5]	male	Hep A	no crowding	inside	inside	yes	yes	yes	yes	yes	no	no	no	normal	elevated	elevated
66080	(5,10]	male	Hep A	no crowding	inside	inside	yes	no	no	yes	yes	yes	yes	yes	normal	normal	elevated
61029	(1,5]	male	no Hep A	crowding	outside	outside	yes	no	no	yes	no	yes	yes	yes	normal	normal	normal
60143	(18,Inf]	male	no Hep A	crowding	inside	inside	yes	no	yes	no	no	yes	no	yes	normal	normal	elevated
51008	(5,10]	male	Hep A	crowding	outside	inside	yes	no	no	yes	yes	yes	yes	yes	normal	normal	normal
41040	(18,Inf]	male	no Hep A	no crowding	inside	inside	yes	no	no	no	no	yes	no	yes	normal	normal	normal
40135	(10,14]	male	no Hep A	no crowding	inside	inside	yes	no	yes	yes	yes	yes	yes	yes	normal	normal	normal
45455	(1,5]	male	no Hep A	no crowding	inside	inside	yes	no	no	no	no	no	no	yes	normal	normal	elevated
42236	(5,10]	male	no Hep A	crowding	outside	inside	yes	no	no	yes	no	no	yes	no	normal	normal	normal
50359	(18,Inf]	male	no Hep A	no crowding	outside	inside	yes	no	yes	yes	yes	yes	yes	yes	normal	normal	normal
41392	(5,10]	male	no Hep A	no crowding	inside	inside	no	no	no	no	no	yes	yes	yes	normal	normal	normal
46019	(5,10]	male	Hep A	crowding	outside	inside	yes	yes	yes	yes	yes	yes	yes	yes	normal	normal	normal
44488	(10,14]	male	no Hep A	no crowding	inside	outside	yes	no	no	yes	no	no	no	yes	normal	normal	normal
60083	(5,10]	male	Hep A	no crowding	outside	inside	yes	no	no	yes	yes	yes	yes	yes	normal	normal	normal
47049	(18,Inf]	male	no Hep A	crowding	outside	outside	yes	no	no	no	no	yes	yes	yes	normal	normal	normal
50228	(5,10]	male	no Hep A	crowding	outside	outside	no	no	no	no	no	no	yes	yes	normal	normal	normal
60355	(10,14]	male	no Hep A	crowding	inside	inside	yes	no	no	no	yes	no	no	yes	normal	normal	normal
60306	(5,10]	male	Hep A	no crowding	inside	inside	yes	yes	yes	yes	yes	yes	yes	yes	normal	elevated	elevated
63102	(5,10]	male	Hep A	no crowding	outside	inside	yes	no	yes	yes	yes	yes	no	yes	normal	elevated	elevated
60361	(5,10]	male	no Hep A	crowding	outside	outside	yes	no	no	yes	yes	yes	yes	yes	normal	normal	elevated
50015	(5,10]	male	no Hep A	crowding	outside	outside	yes	no	no	yes	no	yes	yes	yes	normal	normal	normal
50484	(0,1]	male	no Hep A	crowding	inside	inside	yes	no	yes	yes	no	no	yes	no	normal	normal	normal
60124	(5,10]	male	Hep A	crowding	outside	outside	yes	no	no	yes	yes	yes	yes	yes	normal	normal	normal
41122	(5,10]	male	Hep A	crowding	outside	inside	yes	no	yes	no	no	yes	no	no	normal	elevated	elevated
54272	(1,5]	male	no Hep A	no crowding	outside	inside	yes	no	no	no	no	no	no	no	normal	normal	normal
50311	(14,18]	male	no Hep A	no crowding	inside	inside	yes	no	yes	no	no	no	no	no	normal	normal	elevated
6417	(5,10]	male	no Hep A	crowding	outside	outside	yes	yes	yes	yes	yes	yes	yes	yes	normal	normal	elevated
66247	(1,5]	male	no Hep A	no crowding	outside	inside	no	no	no	no	yes	yes	yes	yes	normal	elevated	normal
50030	(1,5]	male	Hep A	crowding	outside	inside	yes	no	yes	no	no	yes	no	no	normal	normal	normal
50287	(1,5]	male	Hep A	crowding	inside	inside	yes	no	yes	yes	yes	yes	yes	yes	normal	normal	elevated
40271	(1,5]	male	no Hep A	no crowding	inside	inside	no	no	yes	yes	yes	yes	yes	yes	normal	normal	normal
40148	(5,10]	male	no Hep A	crowding	inside	inside	no	no	no	yes	no	yes	no	no	normal	normal	normal
51116	(5,10]	male	no Hep A	no crowding	inside	inside	yes	no	no	yes	yes	yes	yes	yes	normal	normal	normal
62185	(5,10]	male	no Hep A	no crowding	inside	inside	yes	no	no	yes	yes	yes	yes	yes	normal	normal	normal
43153	(5,10]	male	no Hep A	crowding	inside	inside	no	no	yes	no	no	yes	yes	yes	normal	normal	normal
50227	(1,5]	male	no Hep A	crowding	outside	outside	no	no	no	no	no	no	yes	no	normal	normal	normal
41309	(1,5]	male	no Hep A	no crowding	inside	inside	no	no	no	yes	yes	yes	no	yes	normal	normal	normal
40239	(5,10]	male	no Hep A	no crowding	outside	outside	yes	no	no	yes	no	yes	yes	yes	normal	normal	normal
60371	(18,Inf]	male	no Hep A	crowding	outside	inside	no	no	no	no	no	yes	no	no	normal	elevated	elevated
50283	(5,10]	male	no Hep A	no crowding	outside	inside	no	no	no	no	no	no	yes	yes	normal	normal	normal
40278	(18,Inf]	male	no Hep A	no crowding	outside	inside	no	no	no	yes	no	yes	yes	no	normal	elevated	normal
50232	(5,10]	male	no Hep A	no crowding	inside	inside	yes	no	no	yes	no	yes	yes	yes	normal	normal	normal
60141	(1,5]	male	no Hep A	no crowding	outside	outside	yes	no	no	no	no	yes	yes	no	normal	normal	normal
63248	(0,1]	male	no Hep A	no crowding	inside	inside	yes	no	yes	no	yes	no	no	no	normal	normal	elevated
40261	(18,Inf]	male	no Hep A	crowding	outside	inside	yes	no	no	no	no	no	no	no	normal	normal	elevated
40254	(5,10]	male	no Hep A	crowding	outside	outside	yes	no	no	no	no	yes	no	yes	normal	normal	normal
51310	(5,10]	male	Hep A	crowding	outside	inside	yes	no	yes	yes	yes	yes	yes	yes	normal	elevated	elevated
63402	(5,10]	male	no Hep A	no crowding	inside	inside	yes	no	no	yes	no	yes	yes	no	normal	elevated	elevated
63196	(18,Inf]	male	no Hep A	no crowding	inside	inside	yes	no	no	no	yes	no	yes	yes	normal	normal	elevated
66159	(5,10]	male	no Hep A	no crowding	inside	inside	yes	no	no	yes	no	yes	yes	yes	normal	normal	normal
60224	(18,Inf]	male	no Hep A	no crowding	inside	inside	yes	no	no	yes	no	no	yes	no	normal	normal	normal
41142	(10,14]	male	no Hep A	no crowding	inside	inside	yes	no	no	no	no	no	no	no	normal	normal	normal
40318	(5,10]	male	no Hep A	crowding	outside	inside	no	no	no	no	no	no	no	no	normal	elevated	normal
50242	(0,1]	male	no Hep A	crowding	outside	outside	yes	no	no	no	no	no	yes	no	normal	normal	normal
60482	(1,5]	male	no Hep A	no crowding	inside	inside	no	no	no	no	no	yes	yes	yes	normal	normal	normal
40056	(14,18]	male	Hep A	crowding	inside	inside	yes	no	yes	yes	no	yes	yes	yes	normal	elevated	elevated
50474	(1,5]	male	no Hep A	crowding	outside	outside	no	yes	yes	no	yes	no	no	yes	normal	normal	normal
43214	(18,Inf]	male	no Hep A	no crowding	inside	inside	yes	no	no	yes	no	no	yes	yes	normal	normal	normal
66244	(1,5]	male	Hep A	crowding	outside	inside	yes	no	yes	yes	yes	yes	yes	yes	normal	elevated	normal
62129	(18,Inf]	male	no Hep A	no crowding	outside	inside	yes	no	no	yes	no	yes	yes	yes	normal	normal	elevated
610109	(1,5]	male	no Hep A	crowding	outside	outside	yes	no	no	yes	no	no	yes	yes	normal	normal	normal
61039	(18,Inf]	male	no Hep A	crowding	outside	outside	no	no	no	no	no	no	no	no	normal	normal	normal
64520	(14,18]	male	no Hep A	crowding	inside	inside	yes	no	no	yes	no	yes	yes	yes	normal	normal	elevated
65128	(10,14]	male	Hep A	crowding	inside	inside	yes	no	yes	yes	yes	yes	yes	yes	normal	elevated	normal
62021	(14,18]	male	Hep A	crowding	inside	inside	yes	no	no	yes	yes	yes	yes	yes	normal	elevated	elevated
66161	(10,14]	male	no Hep A	crowding	inside	inside	yes	no	no	yes	no	yes	yes	yes	normal	normal	normal
51199	(18,Inf]	male	no Hep A	no crowding	inside	inside	yes	no	yes	yes	no	yes	yes	yes	normal	normal	normal
50200	(10,14]	male	no Hep A	crowding	outside	inside	yes	yes	yes	yes	yes	yes	yes	yes	normal	normal	elevated
50461	(18,Inf]	male	no Hep A	no crowding	inside	inside	yes	no	no	yes	no	no	yes	yes	normal	normal	elevated
60481	(10,14]	male	no Hep A	no crowding	inside	inside	yes	no	no	yes	yes	no	yes	no	normal	normal	normal
41089	(10,14]	male	Hep A	no crowding	inside	inside	yes	no	yes	yes	yes	no	yes	yes	normal	elevated	elevated
60059	(14,18]	male	no Hep A	crowding	outside	inside	yes	no	yes	yes	no	yes	no	no	normal	normal	normal
43395	(1,5]	male	no Hep A	no crowding	outside	inside	no	no	yes	yes	no	yes	no	yes	normal	normal	elevated
66182	(1,5]	male	Hep A	crowding	inside	inside	yes	no	yes	yes	yes	yes	yes	yes	normal	normal	elevated
42489	(14,18]	male	no Hep A	no crowding	outside	outside	yes	no	no	yes	yes	yes	yes	yes	normal	normal	normal
50552	(5,10]	male	no Hep A	crowding	outside	inside	yes	no	no	yes	no	yes	no	yes	normal	elevated	normal
60112	(10,14]	male	no Hep A	no crowding	inside	inside	yes	no	no	yes	yes	yes	yes	yes	normal	normal	normal
60302	(5,10]	male	Hep A	crowding	inside	inside	yes	yes	yes	yes	no	yes	yes	yes	normal	normal	normal
41052	(10,14]	male	no Hep A	crowding	outside	inside	yes	no	no	yes	no	yes	yes	yes	normal	normal	normal
63082	(18,Inf]	male	no Hep A	no crowding	inside	inside	no	no	no	no	no	no	yes	yes	normal	normal	normal
50028	(1,5]	male	no Hep A	crowding	outside	inside	yes	no	no	no	no	yes	no	no	normal	normal	normal
40149	(10,14]	male	no Hep A	crowding	outside	inside	yes	no	yes	no	no	yes	yes	no	normal	normal	normal
41173	(18,Inf]	male	no Hep A	crowding	outside	inside	yes	no	yes	no	no	yes	no	no	normal	normal	normal
42121	(10,14]	male	Hep A	no crowding	outside	inside	yes	no	yes	yes	no	no	yes	no	elevated	elevated	elevated
30322	(1,5]	male	Hep A	no crowding	inside	inside	yes	no	no	no	yes	yes	yes	yes	elevated	elevated	elevated
51506	(5,10]	male	no Hep A	crowding	outside	inside	yes	yes	yes	yes	no	yes	yes	yes	elevated	elevated	normal
52370	(5,10]	male	Hep A	crowding	outside	outside	yes	no	yes	no	yes	yes	yes	yes	elevated	elevated	elevated
66138	(5,10]	male	Hep A	no crowding	outside	inside	yes	yes	yes	no	no	yes	no	yes	elevated	elevated	elevated
64252	(10,14]	male	Hep A	no crowding	outside	outside	yes	no	yes	yes	yes	yes	no	yes	elevated	elevated	elevated
40503	(5,10]	male	Hep A	no crowding	inside	inside	yes	yes	yes	yes	yes	yes	yes	yes	elevated	elevated	normal
40462	(5,10]	male	no Hep A	crowding	outside	inside	yes	no	yes	yes	yes	yes	yes	yes	elevated	elevated	elevated
63119	(5,10]	male	Hep A	crowding	inside	inside	yes	yes	yes	yes	yes	no	yes	yes	elevated	elevated	elevated
40263	(1,5]	male	no Hep A	no crowding	outside	inside	yes	no	no	yes	yes	yes	yes	yes	elevated	elevated	elevated
54048	(5,10]	male	Hep A	crowding	outside	inside	yes	no	no	no	yes	yes	no	yes	elevated	elevated	elevated
47120	(5,10]	male	Hep A	no crowding	outside	outside	yes	no	no	yes	yes	yes	yes	yes	elevated	elevated	elevated
44445	(18,Inf]	male	no Hep A	no crowding	inside	inside	yes	no	no	no	no	yes	no	yes	elevated	normal	elevated
64558	(5,10]	male	Hep A	no crowding	inside	inside	yes	no	yes	yes	yes	yes	yes	yes	elevated	normal	elevated
47505	(5,10]	male	Hep A	crowding	outside	inside	yes	no	no	yes	no	yes	yes	yes	elevated	elevated	normal
65231	(1,5]	male	Hep A	no crowding	inside	inside	yes	no	no	yes	yes	yes	yes	yes	elevated	elevated	elevated
51367	(5,10]	male	no Hep A	no crowding	outside	outside	yes	yes	yes	yes	no	yes	yes	yes	elevated	elevated	elevated
41253	(5,10]	male	Hep A	no crowding	inside	inside	yes	yes	yes	no	yes	yes	yes	no	elevated	elevated	elevated
45439	(1,5]	male	no Hep A	crowding	inside	inside	yes	yes	yes	no	no	no	no	yes	elevated	elevated	elevated
60376	(1,5]	male	Hep A	no crowding	inside	inside	yes	no	no	no	yes	yes	yes	yes	elevated	elevated	elevated
60546	(1,5]	male	Hep A	no crowding	inside	inside	yes	yes	yes	yes	yes	no	yes	yes	elevated	elevated	elevated
41305	(18,Inf]	male	no Hep A	no crowding	inside	inside	yes	no	no	yes	yes	yes	yes	yes	elevated	elevated	elevated
40276	(5,10]	male	Hep A	no crowding	outside	outside	yes	yes	yes	no	no	yes	yes	yes	elevated	elevated	elevated
54067	(5,10]	male	Hep A	no crowding	outside	inside	yes	yes	no	no	yes	yes	yes	yes	elevated	elevated	elevated
60192	(1,5]	male	Hep A	no crowding	outside	inside	yes	no	yes	yes	yes	yes	no	yes	elevated	elevated	elevated
63184	(1,5]	male	Hep A	no crowding	inside	inside	yes	yes	yes	yes	yes	no	yes	no	elevated	elevated	elevated
41280	(18,Inf]	male	no Hep A	crowding	outside	inside	yes	no	yes	yes	yes	yes	no	yes	elevated	normal	normal
64037	(1,5]	male	Hep A	no crowding	outside	inside	yes	no	yes	yes	yes	yes	yes	no	elevated	elevated	normal
40487	(1,5]	male	no Hep A	no crowding	inside	inside	yes	no	no	no	no	no	yes	yes	elevated	elevated	normal
60050	(1,5]	male	Hep A	crowding	outside	inside	yes	no	yes	yes	yes	yes	yes	yes	elevated	elevated	elevated
50500	(0,1]	male	no Hep A	crowding	inside	inside	yes	no	no	yes	no	no	no	no	elevated	normal	elevated
47446	(5,10]	male	Hep A	crowding	outside	inside	yes	no	yes	yes	yes	yes	yes	yes	elevated	elevated	elevated
40299	(1,5]	male	Hep A	crowding	inside	inside	yes	yes	yes	yes	yes	yes	yes	yes	elevated	elevated	elevated
67297	(10,14]	male	Hep A	no crowding	inside	outside	yes	no	yes	yes	yes	yes	yes	yes	elevated	elevated	elevated
40179	(5,10]	male	Hep A	no crowding	outside	inside	yes	yes	yes	yes	yes	yes	yes	no	elevated	elevated	elevated
60480	(5,10]	male	Hep A	no crowding	outside	outside	yes	no	no	no	yes	no	no	yes	elevated	elevated	elevated
63154	(5,10]	male	Hep A	no crowding	inside	inside	yes	no	no	yes	yes	yes	yes	no	elevated	elevated	elevated
40292	(10,14]	male	Hep A	crowding	outside	outside	yes	no	no	no	no	no	yes	yes	elevated	elevated	elevated
61065	(10,14]	male	Hep A	crowding	outside	outside	yes	no	no	yes	no	yes	yes	yes	elevated	elevated	elevated
66230	(1,5]	male	Hep A	crowding	inside	inside	yes	no	yes	yes	yes	yes	yes	yes	elevated	elevated	elevated
54094	(5,10]	male	Hep A	no crowding	inside	inside	yes	yes	yes	yes	yes	no	yes	yes	elevated	elevated	elevated
43338	(10,14]	male	Hep A	no crowding	outside	inside	yes	no	yes	yes	yes	no	yes	yes	elevated	elevated	elevated
60087	(5,10]	male	Hep A	no crowding	inside	inside	yes	yes	yes	yes	yes	yes	yes	yes	elevated	elevated	elevated
40320	(1,5]	male	Hep A	no crowding	outside	inside	yes	no	no	no	yes	yes	no	yes	elevated	elevated	normal
42327	(5,10]	male	no Hep A	crowding	outside	inside	yes	no	yes	yes	yes	yes	no	no	elevated	elevated	elevated
60289	(10,14]	male	Hep A	no crowding	inside	inside	yes	yes	yes	no	yes	yes	yes	yes	elevated	elevated	elevated
62432	(5,10]	male	no Hep A	crowding	outside	inside	yes	no	yes	yes	yes	yes	yes	yes	elevated	elevated	elevated
43460	(5,10]	male	Hep A	crowding	inside	inside	yes	no	no	no	no	yes	yes	yes	elevated	elevated	elevated
63396	(5,10]	male	Hep A	crowding	inside	inside	yes	yes	yes	yes	yes	yes	yes	no	elevated	elevated	elevated
40377	(5,10]	male	no Hep A	crowding	inside	inside	yes	no	yes	no	yes	yes	no	yes	elevated	normal	elevated
66274	(10,14]	male	Hep A	no crowding	inside	inside	yes	no	yes	no	yes	yes	yes	yes	elevated	elevated	elevated
60093	(10,14]	male	Hep A	no crowding	inside	inside	yes	no	no	yes	yes	yes	yes	yes	elevated	elevated	elevated
40314	(18,Inf]	male	no Hep A	no crowding	outside	inside	yes	yes	no	yes	no	yes	no	yes	elevated	elevated	elevated
55516	(5,10]	male	Hep A	no crowding	outside	inside	yes	no	no	yes	yes	yes	yes	yes	elevated	elevated	elevated
64058	(5,10]	male	Hep A	crowding	outside	inside	yes	no	no	yes	yes	yes	no	yes	elevated	elevated	elevated
60296	(5,10]	male	Hep A	no crowding	inside	inside	yes	no	yes	yes	no	yes	no	yes	elevated	elevated	elevated
50380	(10,14]	male	Hep A	no crowding	inside	inside	no	no	no	yes	no	yes	yes	yes	elevated	elevated	elevated
43286	(14,18]	male	no Hep A	crowding	inside	inside	yes	no	no	no	no	yes	no	yes	elevated	normal	elevated
40541	(1,5]	male	Hep A	crowding	outside	outside	yes	no	yes	yes	no	yes	no	no	elevated	elevated	elevated
60125	(5,10]	male	Hep A	crowding	outside	outside	yes	yes	no	yes	yes	yes	yes	yes	elevated	elevated	elevated
60075	(18,Inf]	male	no Hep A	no crowding	outside	inside	yes	no	no	no	no	no	no	no	elevated	elevated	elevated
52315	(1,5]	male	Hep A	crowding	inside	inside	yes	yes	yes	no	no	yes	yes	yes	elevated	elevated	elevated
65237	(5,10]	male	Hep A	crowding	inside	inside	yes	yes	yes	yes	yes	yes	yes	yes	elevated	elevated	elevated
50522	(5,10]	male	Hep A	no crowding	inside	inside	yes	yes	yes	yes	yes	yes	yes	yes	elevated	elevated	elevated
66081	(5,10]	male	Hep A	no crowding	inside	inside	yes	no	no	yes	yes	yes	yes	yes	elevated	elevated	elevated
66202	(10,14]	male	Hep A	no crowding	outside	inside	yes	no	yes	yes	yes	yes	yes	yes	elevated	elevated	elevated
41267	(18,Inf]	male	no Hep A	no crowding	inside	inside	yes	no	yes	yes	no	yes	yes	yes	elevated	elevated	elevated
63055	(18,Inf]	male	no Hep A	no crowding	inside	inside	no	no	no	no	yes	no	yes	yes	elevated	elevated	normal
63090	(5,10]	male	Hep A	no crowding	inside	inside	yes	yes	yes	yes	yes	yes	no	yes	elevated	elevated	elevated
60554	(1,5]	male	Hep A	crowding	outside	outside	yes	no	no	yes	yes	yes	yes	yes	elevated	elevated	elevated
41152	(1,5]	male	Hep A	crowding	outside	inside	yes	no	yes	yes	no	yes	yes	yes	elevated	elevated	elevated
42435	(5,10]	male	no Hep A	crowding	inside	inside	yes	no	no	no	no	yes	no	yes	elevated	elevated	elevated
50421	(1,5]	male	Hep A	no crowding	inside	inside	yes	yes	yes	no	yes	no	yes	yes	elevated	elevated	elevated
60493	(1,5]	male	no Hep A	crowding	inside	inside	yes	no	no	no	no	no	yes	yes	elevated	elevated	elevated
44542	(10,14]	male	no Hep A	crowding	inside	inside	yes	no	yes	yes	yes	yes	yes	yes	elevated	elevated	elevated
40295	(1,5]	male	Hep A	crowding	inside	inside	yes	yes	yes	yes	yes	no	yes	yes	elevated	elevated	elevated
61031	(1,5]	male	Hep A	no crowding	outside	outside	yes	no	yes	yes	yes	no	yes	no	elevated	elevated	elevated
47079	(5,10]	male	Hep A	crowding	outside	inside	yes	no	no	no	no	yes	yes	yes	elevated	elevated	elevated
41137	(5,10]	male	Hep A	crowding	inside	inside	yes	no	yes	yes	yes	yes	no	yes	elevated	elevated	elevated
52301	(1,5]	male	Hep A	crowding	outside	inside	yes	yes	yes	no	yes	no	no	no	elevated	elevated	elevated
41188	(5,10]	male	Hep A	crowding	outside	inside	yes	no	yes	yes	yes	yes	yes	yes	elevated	elevated	elevated
61047	(5,10]	male	Hep A	crowding	outside	outside	no	no	no	yes	yes	yes	yes	yes	elevated	elevated	elevated
41551	(1,5]	male	Hep A	no crowding	outside	inside	yes	yes	no	no	yes	no	yes	yes	elevated	elevated	elevated
50459	(1,5]	male	Hep A	crowding	inside	inside	yes	no	no	no	yes	yes	yes	yes	elevated	elevated	elevated
50512	(1,5]	male	Hep A	crowding	outside	inside	yes	no	yes	no	yes	no	yes	yes	elevated	elevated	normal
63118	(10,14]	male	Hep A	no crowding	outside	outside	yes	yes	no	yes	no	yes	no	yes	elevated	elevated	elevated
63557	(5,10]	male	Hep A	no crowding	inside	inside	yes	no	yes	yes	no	yes	yes	yes	elevated	elevated	elevated
60534	(5,10]	male	Hep A	crowding	outside	outside	yes	no	no	yes	yes	yes	no	yes	elevated	elevated	elevated
51324	(14,18]	male	Hep A	no crowding	inside	inside	yes	yes	yes	no	no	yes	yes	yes	elevated	elevated	elevated
40323	(0,1]	male	no Hep A	crowding	inside	inside	yes	no	no	yes	yes	yes	no	yes	elevated	elevated	elevated
50095	(5,10]	male	Hep A	crowding	inside	inside	yes	yes	yes	yes	yes	yes	yes	yes	elevated	elevated	elevated
62024	(18,Inf]	male	Hep A	no crowding	inside	inside	yes	yes	yes	yes	yes	yes	yes	yes	elevated	elevated	elevated
60216	(18,Inf]	male	no Hep A	crowding	inside	inside	yes	no	yes	yes	no	yes	no	yes	elevated	elevated	elevated
61264	(14,18]	male	Hep A	no crowding	inside	inside	yes	no	yes	no	yes	yes	no	yes	elevated	elevated	elevated
40326	(5,10]	male	Hep A	no crowding	outside	outside	yes	no	yes	no	yes	yes	yes	yes	elevated	elevated	elevated
40419	(5,10]	male	Hep A	crowding	outside	outside	yes	no	no	yes	yes	yes	yes	yes	elevated	elevated	elevated
43205	(5,10]	male	Hep A	no crowding	inside	inside	yes	yes	yes	yes	yes	yes	yes	yes	elevated	elevated	elevated
40234	(5,10]	male	Hep A	crowding	inside	inside	no	yes	no	yes	yes	no	yes	no	elevated	elevated	normal
69144	(5,10]	male	Hep A	crowding	outside	outside	no	no	no	yes	yes	no	yes	no	elevated	elevated	elevated
63513	(18,Inf]	male	no Hep A	no crowding	inside	inside	yes	yes	no	yes	no	yes	yes	yes	elevated	elevated	elevated
40354	(10,14]	male	Hep A	crowding	outside	inside	yes	no	yes	no	yes	no	no	yes	elevated	elevated	elevated
45415	(5,10]	male	Hep A	crowding	inside	inside	yes	no	no	no	no	yes	yes	yes	elevated	elevated	elevated
50041	(5,10]	male	Hep A	no crowding	inside	inside	yes	yes	yes	yes	yes	yes	yes	yes	elevated	elevated	elevated
67291	(10,14]	male	Hep A	no crowding	outside	outside	yes	yes	yes	yes	yes	yes	yes	yes	elevated	elevated	elevated
40258	(14,18]	male	Hep A	no crowding	outside	inside	yes	no	yes	yes	yes	yes	yes	yes	elevated	normal	elevated
50319	(5,10]	male	Hep A	crowding	outside	inside	yes	no	no	yes	yes	no	no	yes	elevated	elevated	elevated
40275	(5,10]	male	Hep A	no crowding	inside	inside	yes	yes	no	yes	no	no	yes	yes	elevated	elevated	elevated
50057	(10,14]	male	Hep A	no crowding	inside	inside	yes	no	no	no	yes	yes	yes	yes	elevated	elevated	elevated
51537	(5,10]	male	no Hep A	no crowding	outside	inside	yes	no	no	yes	yes	yes	yes	yes	elevated	elevated	elevated
60483	(5,10]	male	no Hep A	crowding	inside	inside	no	no	yes	no	no	yes	yes	no	elevated	elevated	normal
43431	(14,18]	male	Hep A	crowding	inside	inside	yes	no	no	yes	yes	no	yes	no	elevated	elevated	elevated
60476	(10,14]	male	Hep A	no crowding	inside	inside	yes	no	yes	yes	yes	no	yes	yes	elevated	elevated	elevated
50069	(10,14]	male	no Hep A	crowding	inside	inside	yes	no	no	yes	yes	yes	yes	yes	elevated	elevated	elevated
64331	(5,10]	male	Hep A	crowding	inside	inside	yes	no	no	yes	yes	yes	yes	yes	elevated	elevated	elevated
47387	(5,10]	male	no Hep A	no crowding	outside	inside	yes	no	yes	yes	yes	yes	yes	yes	elevated	elevated	elevated
60397	(0,1]	male	no Hep A	no crowding	outside	outside	no	no	yes	no	yes	yes	no	no	elevated	elevated	elevated
43413	(1,5]	male	Hep A	crowding	outside	outside	yes	no	no	yes	yes	yes	yes	yes	elevated	elevated	elevated
41165	(5,10]	male	Hep A	no crowding	inside	inside	yes	yes	yes	yes	yes	yes	yes	yes	elevated	elevated	elevated
52470	(5,10]	male	Hep A	crowding	inside	inside	yes	no	yes	no	yes	yes	yes	yes	elevated	elevated	elevated
60357	(5,10]	male	Hep A	crowding	inside	inside	yes	yes	yes	yes	yes	yes	yes	yes	elevated	elevated	elevated
63398	(10,14]	male	Hep A	crowding	inside	inside	yes	no	no	yes	no	no	yes	no	elevated	elevated	elevated
40350	(1,5]	male	Hep A	crowding	outside	outside	yes	yes	yes	yes	yes	yes	yes	yes	elevated	elevated	elevated
43471	(5,10]	male	Hep A	no crowding	inside	inside	yes	no	no	no	yes	yes	yes	yes	elevated	elevated	elevated
50053	(10,14]	male	Hep A	no crowding	inside	inside	yes	no	no	yes	yes	yes	yes	yes	elevated	elevated	elevated
50556	(1,5]	male	Hep A	crowding	outside	inside	yes	no	yes	yes	yes	yes	yes	yes	elevated	elevated	normal
50379	(5,10]	male	Hep A	crowding	inside	inside	yes	no	no	yes	yes	yes	yes	yes	elevated	elevated	elevated
60420	(5,10]	male	Hep A	no crowding	outside	inside	yes	yes	yes	yes	no	yes	yes	yes	elevated	elevated	elevated
63130	(5,10]	male	Hep A	no crowding	outside	outside	yes	yes	yes	yes	yes	yes	yes	yes	elevated	elevated	normal
60458	(10,14]	male	no Hep A	no crowding	inside	inside	yes	no	no	yes	no	yes	yes	yes	elevated	normal	normal
50442	(1,5]	male	Hep A	crowding	outside	outside	yes	yes	yes	yes	no	yes	no	yes	elevated	elevated	elevated
43416	(5,10]	male	Hep A	no crowding	inside	inside	yes	yes	yes	yes	yes	yes	yes	yes	elevated	elevated	elevated
60466	(1,5]	male	no Hep A	no crowding	inside	inside	yes	no	no	no	no	no	no	no	elevated	normal	normal
66181	(5,10]	male	Hep A	crowding	inside	inside	yes	no	yes	yes	yes	yes	yes	no	elevated	elevated	elevated
41105	(14,18]	male	Hep A	no crowding	inside	inside	yes	yes	yes	yes	no	yes	no	yes	elevated	elevated	elevated
50496	(10,14]	male	no Hep A	crowding	inside	inside	yes	no	yes	yes	yes	yes	yes	yes	elevated	elevated	elevated
43191	(5,10]	male	Hep A	no crowding	inside	inside	yes	no	yes	no	no	yes	yes	yes	elevated	elevated	elevated
61115	(5,10]	male	Hep A	crowding	inside	inside	yes	no	no	yes	no	yes	no	yes	elevated	elevated	elevated
61451	(1,5]	male	Hep A	crowding	outside	outside	yes	yes	no	yes	yes	yes	yes	yes	elevated	elevated	normal
66448	(1,5]	male	Hep A	no crowding	inside	inside	yes	no	no	no	yes	yes	yes	no	elevated	elevated	normal
66255	(1,5]	male	Hep A	crowding	outside	inside	yes	no	yes	no	no	yes	no	yes	elevated	elevated	elevated
50111	(5,10]	male	Hep A	no crowding	inside	inside	yes	yes	yes	yes	yes	no	yes	yes	elevated	elevated	elevated
66245	(5,10]	male	Hep A	no crowding	outside	inside	no	no	no	yes	yes	no	yes	yes	elevated	elevated	elevated
66186	(1,5]	male	Hep A	crowding	inside	inside	yes	no	yes	yes	yes	yes	no	yes	elevated	elevated	elevated
43526	(5,10]	male	no Hep A	no crowding	outside	inside	yes	no	no	no	yes	yes	yes	yes	elevated	normal	elevated
63072	(18,Inf]	male	Hep A	no crowding	inside	inside	yes	yes	yes	yes	yes	yes	yes	yes	elevated	elevated	elevated
43325	(18,Inf]	male	Hep A	crowding	outside	inside	yes	no	no	no	yes	yes	yes	yes	elevated	elevated	elevated
44217	(5,10]	male	Hep A	crowding	outside	inside	yes	yes	no	yes	yes	yes	yes	no	elevated	elevated	elevated
60336	(5,10]	male	Hep A	no crowding	inside	inside	yes	no	yes	yes	yes	yes	yes	yes	elevated	elevated	elevated
51073	(10,14]	male	Hep A	crowding	outside	inside	yes	no	yes	yes	yes	yes	yes	yes	elevated	elevated	elevated
60268	(1,5]	male	no Hep A	crowding	inside	inside	yes	no	yes	no	no	no	no	yes	elevated	elevated	elevated
40012	(5,10]	male	Hep A	crowding	outside	inside	yes	yes	yes	yes	yes	yes	yes	yes	elevated	elevated	elevated
60450	(5,10]	male	Hep A	crowding	inside	inside	yes	no	no	no	no	no	yes	yes	elevated	elevated	elevated
40495	(14,18]	male	no Hep A	crowding	outside	inside	yes	no	no	no	no	no	no	no	elevated	normal	elevated
66166	(1,5]	male	Hep A	no crowding	inside	inside	yes	yes	yes	yes	yes	yes	yes	yes	elevated	elevated	elevated
40436	(1,5]	male	no Hep A	crowding	outside	outside	yes	no	no	yes	yes	yes	yes	yes	elevated	normal	elevated
66348	(10,14]	male	no Hep A	crowding	inside	inside	yes	yes	no	yes	yes	yes	yes	yes	elevated	normal	elevated
40384	(5,10]	male	no Hep A	crowding	inside	inside	yes	no	no	no	yes	yes	yes	yes	elevated	elevated	elevated
51334	(5,10]	male	Hep A	no crowding	inside	inside	yes	yes	yes	no	yes	no	yes	yes	elevated	elevated	elevated
40260	(14,18]	male	no Hep A	crowding	outside	inside	yes	yes	yes	yes	yes	yes	yes	yes	elevated	elevated	elevated
43238	(10,14]	male	Hep A	crowding	inside	inside	yes	yes	yes	yes	yes	yes	yes	yes	elevated	elevated	elevated
61078	(10,14]	male	Hep A	crowding	outside	inside	yes	no	no	yes	yes	no	yes	yes	elevated	elevated	elevated
62391	(5,10]	male	no Hep A	no crowding	inside	inside	yes	no	no	no	no	yes	yes	no	elevated	normal	normal
50403	(5,10]	male	no Hep A	no crowding	inside	inside	yes	yes	yes	no	yes	yes	yes	yes	elevated	normal	elevated
40277	(5,10]	male	Hep A	crowding	inside	inside	yes	no	yes	yes	yes	yes	no	yes	elevated	elevated	elevated
61035	(1,5]	male	Hep A	crowding	outside	outside	yes	no	no	yes	yes	no	yes	yes	elevated	elevated	normal
50434	(10,14]	male	no Hep A	crowding	inside	inside	yes	no	no	no	yes	yes	yes	yes	elevated	normal	elevated
51046	(5,10]	male	Hep A	no crowding	outside	inside	yes	yes	yes	yes	yes	yes	yes	yes	elevated	elevated	elevated
47086	(10,14]	male	Hep A	no crowding	inside	inside	yes	no	yes	no	yes	yes	yes	yes	elevated	elevated	elevated
47127	(18,Inf]	male	no Hep A	crowding	outside	inside	yes	no	no	no	no	no	yes	yes	elevated	elevated	elevated
66098	(1,5]	male	Hep A	no crowding	inside	inside	yes	no	yes	yes	yes	no	no	yes	elevated	elevated	elevated
43169	(10,14]	male	Hep A	no crowding	outside	inside	yes	yes	yes	yes	yes	no	yes	no	elevated	elevated	elevated
63452	(1,5]	male	no Hep A	crowding	inside	inside	yes	no	no	yes	yes	yes	yes	yes	elevated	elevated	elevated
66428	(1,5]	male	no Hep A	crowding	inside	inside	yes	no	no	no	yes	yes	yes	yes	elevated	elevated	elevated
66183	(1,5]	male	Hep A	crowding	inside	inside	yes	yes	yes	no	yes	yes	no	yes	elevated	elevated	elevated
62243	(1,5]	male	Hep A	no crowding	inside	inside	yes	yes	no	yes	no	yes	yes	yes	elevated	elevated	elevated
60399	(1,5]	male	Hep A	no crowding	outside	outside	yes	yes	yes	no	no	yes	no	yes	elevated	elevated	elevated
44366	(1,5]	male	no Hep A	crowding	outside	inside	yes	yes	yes	yes	no	yes	yes	yes	elevated	elevated	elevated
40548	(5,10]	male	Hep A	no crowding	inside	inside	yes	no	no	yes	no	no	yes	yes	elevated	elevated	elevated
41064	(18,Inf]	male	no Hep A	crowding	inside	inside	yes	no	yes	yes	yes	yes	yes	yes	elevated	elevated	elevated
66156	(5,10]	male	Hep A	no crowding	inside	inside	yes	yes	no	yes	yes	yes	yes	yes	elevated	elevated	elevated
47411	(5,10]	male	Hep A	no crowding	outside	outside	yes	no	yes	no	no	yes	yes	no	elevated	elevated	elevated
50001	(1,5]	male	Hep A	crowding	outside	inside	yes	no	yes	yes	yes	yes	yes	yes	elevated	elevated	elevated
60545	(1,5]	male	no Hep A	no crowding	inside	inside	yes	no	no	no	no	yes	yes	yes	elevated	elevated	elevated
63203	(5,10]	male	Hep A	crowding	inside	inside	yes	no	no	no	yes	no	yes	yes	elevated	elevated	elevated
50333	(5,10]	male	no Hep A	crowding	outside	outside	yes	no	no	yes	no	yes	yes	yes	elevated	elevated	elevated
40491	(5,10]	male	Hep A	crowding	outside	inside	yes	no	yes	no	no	yes	yes	yes	elevated	elevated	elevated

## Sheet: table2
uniqueID	age_cat7_25	anti_hav_concentration_iu	anti_hav_concentration_iu_numeric	anti_hav_seroprotection_yn
60017	(20,25]	15720	15720	yes
66256	(1,6]	18680	18680	yes
63250	(25,Inf]	3847	3847	yes
63223	(25,Inf]	7551	7551	yes
50010	(6,11]	18220	18220	yes
40132	(25,Inf]	7996	7996	yes
54077	(11,16]	989	989	yes
44007	(20,25]	28970	28970	yes
63074	(16,20]	1200	1200	yes
610108	(25,Inf]	8043	8043	yes
60198	(25,Inf]	24450	24450	yes
63003	(1,6]	13960	13960	yes
43206	(20,25]	8699	8699	yes
43155	(1,6]	74570	74570	yes
43189	(16,20]	12760	12760	yes
60060	(20,25]	18200	18200	yes
61034	(25,Inf]	9000	9000	yes
50193	(11,16]	25930	25930	yes
40140	(25,Inf]	26440	26440	yes
66163	(6,11]	53960	53960	yes
66249	(6,11]	9719	9719	yes
50061	(6,11]	17540	17540	yes
66195	(6,11]	5838	5838	yes
50240	(25,Inf]	8863	8863	yes
64147	(0,1]	258	258	yes
66168	(6,11]	< 10	5	no
60126	(25,Inf]	5772	5772	yes
54076	(16,20]	16090	16090	yes
62113	(25,Inf]	1689	1689	yes
44006	(1,6]	< 10	5	no
47088	(25,Inf]	34150	34150	yes
43194	(25,Inf]	602	602	yes
61025	(1,6]	82430	82430	yes
60085	(11,16]	11830	11830	yes
50131	(25,Inf]	942	942	yes
40204	(6,11]	< 10	5	no
63106	(0,1]	< 10	5	no
62157	(20,25]	3529	3529	yes
50226	(1,6]	< 10	5	no
40212	(1,6]	209900	209900	yes
40150	(25,Inf]	2567	2567	yes
61033	(20,25]	6581	6581	yes
40172	(0,1]	341	341	yes
50241	(1,6]	119	119	yes
44170	(16,20]	32300	32300	yes
67051	(11,16]	12550	12550	yes
54070	(11,16]	8820	8820	yes
60123	(11,16]	29070	29070	yes
61029	(1,6]	607	607	yes
60143	(25,Inf]	3917	3917	yes
41040	(16,20]	< 10	5	no
40135	(11,16]	6362	6362	yes
42236	(6,11]	62	62	yes
47049	(20,25]	29050	29050	yes
50228	(6,11]	28170	28170	yes
50015	(6,11]	65000	65000	yes
66247	(1,6]	615	615	yes
40148	(6,11]	147100	147100	yes
51116	(6,11]	23310	23310	yes
62185	(1,6]	28670	28670	yes
43153	(6,11]	85320	85320	yes
50227	(1,6]	< 10	5	no
40239	(6,11]	32080	32080	yes
50232	(1,6]	11	11	no
60141	(1,6]	26290	26290	yes
63248	(0,1]	6173	6173	yes
40261	(20,25]	4865	4865	yes
40254	(6,11]	28700	28700	yes
63196	(25,Inf]	23450	23450	yes
66159	(6,11]	39550	39550	yes
60224	(25,Inf]	5544	5544	yes
41142	(11,16]	50380	50380	yes
50242	(0,1]	< 10	5	no
43214	(25,Inf]	1561	1561	yes
62129	(16,20]	5189	5189	yes
610109	(1,6]	< 10	5	no
61039	(25,Inf]	5016	5016	yes
66161	(6,11]	23360	23360	yes
51199	(16,20]	< 10	5	no
50200	(11,16]	20340	20340	yes
60059	(11,16]	15320	15320	yes
60112	(11,16]	9988	9988	yes
41052	(6,11]	9310	9310	yes
63082	(25,Inf]	9022	9022	yes
50028	(1,6]	7370	7370	yes
40149	(6,11]	41860	41860	yes
41173	(20,25]	21640	21640	yes
60075	(25,Inf]	4293	4293	yes
63055	(25,Inf]	23190	23190	yes
60216	(25,Inf]	2028	2028	yes
50069	(11,16]	20750	20750	yes
40260	(11,16]	1016	1016	yes
47127	(25,Inf]	9656	9656	yes
41064	(25,Inf]	933	933	yes

## Sheet: table3
uniqueID	age_cat7_18	sex	housing	toilets	water	hepA_yn
66167	(5,10]	female	crowding	outside	inside	Hep A
47369	(5,10]	female	no crowding	outside	outside	no Hep A
41400	(5,10]	female	no crowding	inside	inside	no Hep A
40330	(5,10]	female	crowding	outside	outside	no Hep A
63383	(2,5]	female	no crowding	inside	inside	Hep A
40463	(18,Inf]	female	no crowding	inside	inside	no Hep A
60017	(18,Inf]	female	no crowding	inside	inside	no Hep A
66256	(2,5]	female	no crowding	outside	inside	no Hep A
40429	(5,10]	female	no crowding	outside	inside	no Hep A
63250	(18,Inf]	female	no crowding	inside	inside	no Hep A
42444	(18,Inf]	female	no crowding	inside	inside	no Hep A
60360	(5,10]	female	no crowding	inside	inside	no Hep A
63223	(18,Inf]	female	no crowding	inside	inside	no Hep A
50010	(5,10]	female	no crowding	outside	outside	no Hep A
40132	(18,Inf]	female	no crowding	inside	inside	no Hep A
54077	(10,14]	female	no crowding	outside	inside	no Hep A
44007	(18,Inf]	female	no crowding	outside	outside	no Hep A
60533	(18,Inf]	female	no crowding	inside	inside	no Hep A
63074	(18,Inf]	female	no crowding	inside	inside	no Hep A
51009	(10,14]	female	crowding	outside	inside	Hep A
60521	(18,Inf]	female	no crowding	inside	inside	no Hep A
61026	(2,5]	female	crowding	inside	outside	Hep A
610108	(18,Inf]	female	crowding	outside	outside	no Hep A
60198	(18,Inf]	female	no crowding	inside	inside	no Hep A
43294	(2,5]	female	crowding	outside	inside	no Hep A
41519	(18,Inf]	female	no crowding	inside	inside	no Hep A
63003	(2,5]	female	no crowding	inside	inside	no Hep A
43206	(18,Inf]	female	no crowding	inside	inside	no Hep A
43155	(5,10]	female	crowding	inside	inside	no Hep A
43189	(14,18]	female	no crowding	inside	inside	no Hep A
60060	(18,Inf]	female	crowding	inside	inside	no Hep A
61034	(18,Inf]	female	crowding	outside	outside	no Hep A
66441	(5,10]	female	no crowding	inside	inside	Hep A
50193	(14,18]	female	no crowding	inside	inside	no Hep A
69511	(2,5]	female	no crowding	outside	outside	no Hep A
40257	(5,10]	female	no crowding	outside	inside	Hep A
40140	(18,Inf]	female	no crowding	inside	inside	no Hep A
60465	(18,Inf]	female	no crowding	inside	inside	no Hep A
60437	(10,14]	female	no crowding	inside	inside	no Hep A
61036	(18,Inf]	female	no crowding	inside	inside	Hep A
66163	(5,10]	female	no crowding	inside	inside	no Hep A
66249	(5,10]	female	no crowding	outside	inside	no Hep A
40279	(18,Inf]	female	no crowding	outside	outside	no Hep A
50061	(5,10]	female	crowding	inside	inside	no Hep A
40498	(18,Inf]	female	no crowding	inside	inside	no Hep A
60536	(10,14]	female	no crowding	inside	inside	no Hep A
41339	(5,10]	female	crowding	outside	inside	no Hep A
66195	(5,10]	female	no crowding	inside	inside	no Hep A
60362	(5,10]	female	crowding	outside	inside	Hep A
66160	(5,10]	female	no crowding	inside	inside	Hep A
50240	(18,Inf]	female	no crowding	inside	inside	no Hep A
64147	(0,1]	female	no crowding	outside	outside	no Hep A
41321	(2,5]	female	no crowding	inside	inside	no Hep A
66168	(5,10]	female	crowding	outside	inside	no Hep A
6018	(10,14]	female	no crowding	inside	inside	no Hep A
52342	(1,2]	female	crowding	outside	inside	no Hep A
60126	(18,Inf]	female	crowding	outside	outside	no Hep A
54076	(18,Inf]	female	no crowding	outside	inside	no Hep A
62113	(18,Inf]	female	no crowding	inside	inside	no Hep A
44006	(5,10]	female	no crowding	inside	inside	no Hep A
47088	(18,Inf]	female	no crowding	outside	inside	no Hep A
60514	(2,5]	female	no crowding	inside	inside	no Hep A
43497	(5,10]	female	crowding	inside	inside	no Hep A
40453	(0,1]	female	crowding	inside	inside	no Hep A
40229	(2,5]	female	no crowding	outside	inside	Hep A
43194	(18,Inf]	female	no crowding	inside	inside	no Hep A
61027	(2,5]	female	crowding	outside	inside	Hep A
41454	(5,10]	female	crowding	inside	inside	Hep A
60378	(18,Inf]	female	no crowding	inside	inside	no Hep A
61025	(5,10]	female	crowding	outside	outside	no Hep A
60085	(10,14]	female	crowding	outside	inside	no Hep A
60084	(5,10]	female	crowding	outside	inside	Hep A
50131	(18,Inf]	female	no crowding	inside	inside	no Hep A
40204	(5,10]	female	crowding	outside	inside	no Hep A
50023	(2,5]	female	no crowding	outside	outside	Hep A
60535	(10,14]	female	no crowding	outside	outside	Hep A
68438	(5,10]	female	no crowding	outside	outside	Hep A
50066	(5,10]	female	crowding	outside	inside	Hep A
40477	(5,10]	female	crowding	outside	inside	Hep A
50303	(2,5]	female	crowding	outside	inside	Hep A
52502	(2,5]	female	no crowding	inside	inside	no Hep A
65158	(5,10]	female	crowding	outside	inside	Hep A
44527	(5,10]	female	no crowding	inside	inside	Hep A
63235	(5,10]	female	no crowding	inside	inside	Hep A
64479	(5,10]	female	crowding	inside	inside	Hep A
60316	(2,5]	female	crowding	inside	inside	Hep A
41401	(5,10]	female	no crowding	inside	inside	no Hep A
65412	(0,1]	female	no crowding	inside	inside	Hep A
43364	(5,10]	female	crowding	outside	outside	no Hep A
62492	(5,10]	female	crowding	outside	inside	Hep A
66221	(10,14]	female	no crowding	outside	inside	Hep A
63096	(5,10]	female	no crowding	outside	outside	Hep A
61308	(5,10]	female	crowding	outside	outside	Hep A
63106	(0,1]	female	no crowding	inside	inside	no Hep A
51457	(2,5]	female	crowding	outside	inside	no Hep A
43117	(5,10]	female	no crowding	inside	inside	Hep A
62157	(18,Inf]	female	no crowding	inside	inside	no Hep A
65504	(1,2]	female	crowding	inside	inside	Hep A
60114	(5,10]	female	no crowding	inside	inside	Hep A
42201	(10,14]	female	no crowding	inside	inside	Hep A
43447	(5,10]	female	crowding	outside	inside	no Hep A
44209	(5,10]	female	no crowding	inside	inside	Hep A
51385	(10,14]	female	no crowding	inside	inside	no Hep A
65365	(10,14]	female	crowding	inside	inside	no Hep A
41347	(2,5]	female	no crowding	inside	inside	Hep A
52343	(5,10]	female	crowding	outside	outside	Hep A
66222	(5,10]	female	no crowding	outside	inside	Hep A
51404	(2,5]	female	crowding	inside	inside	no Hep A
60553	(5,10]	female	crowding	outside	inside	Hep A
64045	(14,18]	female	crowding	outside	outside	Hep A
41197	(5,10]	female	crowding	inside	inside	Hep A
41151	(5,10]	female	crowding	inside	inside	Hep A
60449	(1,2]	female	crowding	inside	inside	no Hep A
63091	(5,10]	female	crowding	inside	inside	Hep A
42531	(10,14]	female	crowding	inside	inside	no Hep A
60538	(0,1]	female	crowding	inside	inside	no Hep A
55388	(5,10]	female	crowding	outside	outside	Hep A
50298	(5,10]	female	crowding	inside	inside	Hep A
65187	(10,14]	female	crowding	inside	inside	Hep A
47328	(18,Inf]	female	no crowding	outside	inside	no Hep A
50038	(10,14]	female	crowding	inside	inside	Hep A
63104	(5,10]	female	no crowding	outside	inside	Hep A
67043	(5,10]	female	crowding	outside	inside	Hep A
41501	(10,14]	female	no crowding	inside	inside	no Hep A
44508	(5,10]	female	crowding	outside	inside	no Hep A
60374	(2,5]	female	no crowding	inside	inside	Hep A
47394	(5,10]	female	no crowding	outside	inside	no Hep A
43190	(2,5]	female	crowding	outside	inside	Hep A
42133	(5,10]	female	no crowding	outside	inside	Hep A
60288	(2,5]	female	crowding	inside	inside	Hep A
44368	(5,10]	female	no crowding	inside	inside	Hep A
61032	(5,10]	female	crowding	outside	outside	Hep A
60528	(5,10]	female	crowding	inside	inside	Hep A
63424	(14,18]	female	no crowding	inside	inside	no Hep A
40273	(5,10]	female	crowding	inside	inside	no Hep A
63233	(5,10]	female	crowding	outside	inside	Hep A
41341	(1,2]	female	no crowding	outside	inside	no Hep A
50518	(5,10]	female	crowding	inside	inside	Hep A
43410	(5,10]	female	no crowding	outside	inside	no Hep A
47408	(5,10]	female	no crowding	outside	inside	Hep A
47005	(10,14]	female	crowding	outside	outside	Hep A
64145	(5,10]	female	crowding	outside	outside	Hep A
40022	(2,5]	female	no crowding	outside	outside	Hep A
47269	(5,10]	female	crowding	outside	outside	Hep A
40225	(5,10]	female	no crowding	inside	inside	Hep A
40262	(10,14]	female	crowding	outside	outside	Hep A
62405	(0,1]	female	crowding	outside	outside	no Hep A
50393	(5,10]	female	no crowding	outside	outside	Hep A
63176	(5,10]	female	crowding	outside	inside	Hep A
45510	(10,14]	female	crowding	inside	inside	no Hep A
60543	(5,10]	female	no crowding	outside	inside	Hep A
50525	(5,10]	female	crowding	outside	inside	Hep A
60381	(5,10]	female	no crowding	inside	inside	no Hep A
60344	(2,5]	female	no crowding	outside	outside	no Hep A
43539	(2,5]	female	crowding	inside	inside	no Hep A
52352	(5,10]	female	crowding	inside	inside	Hep A
64406	(0,1]	female	crowding	outside	outside	no Hep A
60544	(5,10]	female	crowding	inside	inside	Hep A
60312	(5,10]	female	no crowding	inside	inside	Hep A
50443	(5,10]	female	crowding	outside	outside	Hep A
65100	(5,10]	female	crowding	outside	inside	Hep A
56337	(0,1]	female	crowding	outside	outside	no Hep A
40407	(5,10]	female	crowding	inside	inside	no Hep A
60486	(18,Inf]	female	crowding	inside	inside	no Hep A
42532	(2,5]	female	crowding	inside	inside	no Hep A
610110	(5,10]	female	no crowding	outside	inside	Hep A
50425	(5,10]	female	crowding	inside	inside	Hep A
65171	(5,10]	female	no crowding	inside	inside	Hep A
66335	(5,10]	female	crowding	outside	outside	Hep A
42332	(5,10]	female	no crowding	outside	outside	Hep A
50358	(5,10]	female	crowding	outside	inside	Hep A
50409	(2,5]	female	no crowding	outside	inside	Hep A
54340	(5,10]	female	crowding	inside	inside	Hep A
60313	(18,Inf]	female	crowding	inside	inside	no Hep A
40524	(5,10]	female	crowding	outside	outside	Hep A
66180	(10,14]	female	no crowding	outside	inside	Hep A
60293	(5,10]	female	crowding	inside	inside	Hep A
60467	(5,10]	female	no crowding	inside	inside	Hep A
66178	(5,10]	female	no crowding	inside	inside	Hep A
40351	(5,10]	female	crowding	outside	outside	Hep A
40134	(10,14]	female	crowding	outside	inside	Hep A
51530	(10,14]	female	crowding	outside	inside	no Hep A
51549	(5,10]	female	crowding	inside	inside	Hep A
62414	(5,10]	female	crowding	inside	inside	Hep A
40177	(5,10]	female	crowding	outside	inside	Hep A
63013	(2,5]	female	crowding	inside	inside	Hep A
63349	(0,1]	female	crowding	inside	inside	Hep A
52346	(2,5]	female	no crowding	outside	outside	no Hep A
40213	(5,10]	female	crowding	outside	inside	Hep A
54071	(2,5]	female	crowding	inside	inside	Hep A
45211	(5,10]	female	crowding	inside	inside	Hep A
60473	(2,5]	female	no crowding	inside	inside	Hep A
64146	(5,10]	female	crowding	outside	inside	Hep A
67136	(5,10]	female	crowding	outside	inside	Hep A
65103	(5,10]	female	no crowding	inside	inside	Hep A
52345	(10,14]	female	crowding	inside	inside	Hep A
50226	(2,5]	female	no crowding	outside	outside	no Hep A
60011	(10,14]	female	no crowding	inside	inside	Hep A
41164	(5,10]	female	crowding	outside	inside	Hep A
50422	(5,10]	female	crowding	outside	outside	Hep A
65386	(2,5]	female	crowding	outside	outside	Hep A
50456	(10,14]	female	crowding	outside	inside	Hep A
63042	(5,10]	female	crowding	outside	inside	Hep A
50270	(18,Inf]	female	no crowding	inside	inside	no Hep A
47373	(2,5]	female	crowding	outside	inside	Hep A
64430	(5,10]	female	no crowding	outside	inside	Hep A
64507	(10,14]	female	no crowding	inside	inside	Hep A
66219	(2,5]	female	crowding	outside	inside	Hep A
54020	(5,10]	female	no crowding	outside	inside	Hep A
60307	(2,5]	female	crowding	inside	inside	Hep A
50107	(5,10]	female	crowding	outside	inside	Hep A
41485	(18,Inf]	female	no crowding	inside	inside	no Hep A
64259	(5,10]	female	crowding	inside	inside	Hep A
42490	(0,1]	female	crowding	inside	inside	no Hep A
40215	(5,10]	female	crowding	inside	outside	Hep A
42478	(2,5]	female	no crowding	outside	inside	Hep A
40266	(10,14]	female	no crowding	inside	inside	Hep A
54002	(5,10]	female	crowding	inside	inside	Hep A
40139	(5,10]	female	no crowding	inside	inside	Hep A
50282	(10,14]	female	no crowding	outside	inside	Hep A
40212	(2,5]	female	no crowding	outside	outside	no Hep A
60475	(10,14]	female	no crowding	inside	inside	no Hep A
51062	(5,10]	female	crowding	inside	outside	Hep A
41375	(18,Inf]	female	no crowding	outside	inside	no Hep A
60382	(5,10]	female	crowding	outside	outside	no Hep A
47426	(5,10]	female	no crowding	inside	inside	no Hep A
60499	(18,Inf]	female	no crowding	inside	inside	no Hep A
54044	(5,10]	female	no crowding	inside	inside	Hep A
41372	(18,Inf]	female	no crowding	inside	inside	no Hep A
40208	(5,10]	female	crowding	outside	inside	Hep A
60016	(14,18]	female	no crowding	inside	inside	Hep A
40174	(2,5]	female	crowding	outside	inside	Hep A
40559	(10,14]	female	no crowding	outside	outside	no Hep A
66509	(2,5]	female	crowding	outside	inside	Hep A
43317	(10,14]	female	crowding	inside	inside	Hep A
63175	(5,10]	female	crowding	outside	inside	Hep A
63101	(5,10]	female	crowding	inside	inside	Hep A
40150	(18,Inf]	female	crowding	outside	inside	no Hep A
66092	(10,14]	female	no crowding	inside	inside	Hep A
40356	(2,5]	female	crowding	outside	outside	Hep A
60300	(10,14]	female	crowding	outside	inside	Hep A
66440	(5,10]	female	crowding	inside	inside	Hep A
67494	(5,10]	female	crowding	inside	outside	Hep A
30353	(18,Inf]	female	no crowding	inside	inside	no Hep A
44550	(5,10]	female	crowding	outside	inside	Hep A
50464	(5,10]	female	crowding	outside	inside	Hep A
40099	(10,14]	female	crowding	outside	inside	Hep A
50550	(5,10]	female	crowding	inside	inside	Hep A
43555	(2,5]	female	no crowding	outside	inside	Hep A
64218	(5,10]	female	no crowding	inside	inside	Hep A
66468	(5,10]	female	no crowding	inside	inside	no Hep A
54018	(14,18]	female	crowding	outside	inside	Hep A
40472	(5,10]	female	crowding	inside	inside	no Hep A
50469	(18,Inf]	female	no crowding	inside	inside	no Hep A
47390	(5,10]	female	no crowding	inside	inside	Hep A
43523	(18,Inf]	female	no crowding	inside	inside	no Hep A
63517	(2,5]	female	no crowding	inside	inside	no Hep A
47054	(5,10]	female	crowding	outside	outside	Hep A
63097	(5,10]	female	no crowding	outside	outside	Hep A
43063	(5,10]	female	crowding	inside	inside	Hep A
61033	(18,Inf]	female	crowding	outside	outside	no Hep A
51433	(2,5]	female	no crowding	inside	inside	no Hep A
40529	(5,10]	female	no crowding	outside	inside	Hep A
60423	(5,10]	female	no crowding	inside	inside	Hep A
40207	(5,10]	female	no crowding	inside	inside	Hep A
60068	(5,10]	female	no crowding	inside	inside	Hep A
40304	(5,10]	female	crowding	outside	inside	Hep A
56329	(2,5]	female	crowding	inside	inside	Hep A
42547	(10,14]	female	crowding	inside	inside	no Hep A
40290	(5,10]	female	crowding	outside	inside	Hep A
56515	(2,5]	female	crowding	inside	inside	no Hep A
40246	(2,5]	female	no crowding	inside	inside	no Hep A
60220	(5,10]	female	crowding	outside	inside	Hep A
41251	(18,Inf]	female	crowding	outside	inside	Hep A
63363	(0,1]	female	no crowding	inside	inside	no Hep A
50284	(2,5]	female	crowding	outside	inside	Hep A
61014	(5,10]	female	no crowding	inside	inside	Hep A
40172	(0,1]	male	no crowding	inside	inside	no Hep A
66389	(5,10]	male	no crowding	inside	inside	Hep A
54281	(18,Inf]	male	no crowding	inside	inside	no Hep A
60285	(18,Inf]	male	no crowding	inside	inside	no Hep A
50241	(5,10]	male	no crowding	inside	inside	no Hep A
44170	(18,Inf]	male	no crowding	inside	inside	no Hep A
67051	(10,14]	male	crowding	outside	inside	no Hep A
54070	(14,18]	male	crowding	inside	inside	no Hep A
40265	(2,5]	male	crowding	outside	inside	no Hep A
66162	(10,14]	male	no crowding	inside	inside	Hep A
60123	(10,14]	male	crowding	outside	outside	no Hep A
41004	(2,5]	male	no crowding	inside	inside	Hep A
66080	(5,10]	male	no crowding	inside	inside	Hep A
61029	(2,5]	male	crowding	outside	outside	no Hep A
60143	(18,Inf]	male	crowding	inside	inside	no Hep A
51008	(5,10]	male	crowding	outside	inside	Hep A
41040	(18,Inf]	male	no crowding	inside	inside	no Hep A
40135	(10,14]	male	no crowding	inside	inside	no Hep A
45455	(1,2]	male	no crowding	inside	inside	no Hep A
42236	(5,10]	male	crowding	outside	inside	no Hep A
50359	(18,Inf]	male	no crowding	outside	inside	no Hep A
41392	(5,10]	male	no crowding	inside	inside	no Hep A
46019	(5,10]	male	crowding	outside	inside	Hep A
44488	(10,14]	male	no crowding	inside	outside	no Hep A
60083	(5,10]	male	no crowding	outside	inside	Hep A
47049	(18,Inf]	male	crowding	outside	outside	no Hep A
50228	(5,10]	male	crowding	outside	outside	no Hep A
60355	(10,14]	male	crowding	inside	inside	no Hep A
60306	(5,10]	male	no crowding	inside	inside	Hep A
63102	(5,10]	male	no crowding	outside	inside	Hep A
60361	(5,10]	male	crowding	outside	outside	no Hep A
50015	(5,10]	male	crowding	outside	outside	no Hep A
50484	(0,1]	male	crowding	inside	inside	no Hep A
60124	(5,10]	male	crowding	outside	outside	Hep A
41122	(5,10]	male	crowding	outside	inside	Hep A
54272	(2,5]	male	no crowding	outside	inside	no Hep A
50311	(14,18]	male	no crowding	inside	inside	no Hep A
6417	(5,10]	male	crowding	outside	outside	no Hep A
66247	(2,5]	male	no crowding	outside	inside	no Hep A
50030	(2,5]	male	crowding	outside	inside	Hep A
50287	(2,5]	male	crowding	inside	inside	Hep A
40271	(2,5]	male	no crowding	inside	inside	no Hep A
40148	(5,10]	male	crowding	inside	inside	no Hep A
51116	(5,10]	male	no crowding	inside	inside	no Hep A
62185	(5,10]	male	no crowding	inside	inside	no Hep A
43153	(5,10]	male	crowding	inside	inside	no Hep A
50227	(2,5]	male	crowding	outside	outside	no Hep A
41309	(2,5]	male	no crowding	inside	inside	no Hep A
40239	(5,10]	male	no crowding	outside	outside	no Hep A
60371	(18,Inf]	male	crowding	outside	inside	no Hep A
50283	(5,10]	male	no crowding	outside	inside	no Hep A
40278	(18,Inf]	male	no crowding	outside	inside	no Hep A
50232	(5,10]	male	no crowding	inside	inside	no Hep A
60141	(2,5]	male	no crowding	outside	outside	no Hep A
63248	(0,1]	male	no crowding	inside	inside	no Hep A
40261	(18,Inf]	male	crowding	outside	inside	no Hep A
40254	(5,10]	male	crowding	outside	outside	no Hep A
51310	(5,10]	male	crowding	outside	inside	Hep A
63402	(5,10]	male	no crowding	inside	inside	no Hep A
63196	(18,Inf]	male	no crowding	inside	inside	no Hep A
66159	(5,10]	male	no crowding	inside	inside	no Hep A
60224	(18,Inf]	male	no crowding	inside	inside	no Hep A
41142	(10,14]	male	no crowding	inside	inside	no Hep A
40318	(5,10]	male	crowding	outside	inside	no Hep A
50242	(0,1]	male	crowding	outside	outside	no Hep A
60482	(2,5]	male	no crowding	inside	inside	no Hep A
40056	(14,18]	male	crowding	inside	inside	Hep A
50474	(2,5]	male	crowding	outside	outside	no Hep A
43214	(18,Inf]	male	no crowding	inside	inside	no Hep A
66244	(2,5]	male	crowding	outside	inside	Hep A
62129	(18,Inf]	male	no crowding	outside	inside	no Hep A
610109	(2,5]	male	crowding	outside	outside	no Hep A
61039	(18,Inf]	male	crowding	outside	outside	no Hep A
64520	(14,18]	male	crowding	inside	inside	no Hep A
65128	(10,14]	male	crowding	inside	inside	Hep A
62021	(14,18]	male	crowding	inside	inside	Hep A
66161	(10,14]	male	crowding	inside	inside	no Hep A
51199	(18,Inf]	male	no crowding	inside	inside	no Hep A
50200	(10,14]	male	crowding	outside	inside	no Hep A
50461	(18,Inf]	male	no crowding	inside	inside	no Hep A
60481	(10,14]	male	no crowding	inside	inside	no Hep A
41089	(10,14]	male	no crowding	inside	inside	Hep A
60059	(14,18]	male	crowding	outside	inside	no Hep A
43395	(1,2]	male	no crowding	outside	inside	no Hep A
66182	(2,5]	male	crowding	inside	inside	Hep A
42489	(14,18]	male	no crowding	outside	outside	no Hep A
50552	(5,10]	male	crowding	outside	inside	no Hep A
60112	(10,14]	male	no crowding	inside	inside	no Hep A
60302	(5,10]	male	crowding	inside	inside	Hep A
41052	(10,14]	male	crowding	outside	inside	no Hep A
63082	(18,Inf]	male	no crowding	inside	inside	no Hep A
50028	(2,5]	male	crowding	outside	inside	no Hep A
40149	(10,14]	male	crowding	outside	inside	no Hep A
41173	(18,Inf]	male	crowding	outside	inside	no Hep A
42121	(10,14]	male	no crowding	outside	inside	Hep A
30322	(2,5]	male	no crowding	inside	inside	Hep A
51506	(5,10]	male	crowding	outside	inside	no Hep A
52370	(5,10]	male	crowding	outside	outside	Hep A
66138	(5,10]	male	no crowding	outside	inside	Hep A
64252	(10,14]	male	no crowding	outside	outside	Hep A
40503	(5,10]	male	no crowding	inside	inside	Hep A
40462	(5,10]	male	crowding	outside	inside	no Hep A
63119	(5,10]	male	crowding	inside	inside	Hep A
40263	(2,5]	male	no crowding	outside	inside	no Hep A
54048	(5,10]	male	crowding	outside	inside	Hep A
47120	(5,10]	male	no crowding	outside	outside	Hep A
44445	(18,Inf]	male	no crowding	inside	inside	no Hep A
64558	(5,10]	male	no crowding	inside	inside	Hep A
47505	(5,10]	male	crowding	outside	inside	Hep A
65231	(2,5]	male	no crowding	inside	inside	Hep A
51367	(5,10]	male	no crowding	outside	outside	no Hep A
41253	(5,10]	male	no crowding	inside	inside	Hep A
45439	(1,2]	male	crowding	inside	inside	no Hep A
60376	(2,5]	male	no crowding	inside	inside	Hep A
60546	(2,5]	male	no crowding	inside	inside	Hep A
41305	(18,Inf]	male	no crowding	inside	inside	no Hep A
40276	(5,10]	male	no crowding	outside	outside	Hep A
54067	(5,10]	male	no crowding	outside	inside	Hep A
60192	(2,5]	male	no crowding	outside	inside	Hep A
63184	(2,5]	male	no crowding	inside	inside	Hep A
41280	(18,Inf]	male	crowding	outside	inside	no Hep A
64037	(2,5]	male	no crowding	outside	inside	Hep A
40487	(2,5]	male	no crowding	inside	inside	no Hep A
60050	(2,5]	male	crowding	outside	inside	Hep A
50500	(0,1]	male	crowding	inside	inside	no Hep A
47446	(5,10]	male	crowding	outside	inside	Hep A
40299	(2,5]	male	crowding	inside	inside	Hep A
67297	(10,14]	male	no crowding	inside	outside	Hep A
40179	(5,10]	male	no crowding	outside	inside	Hep A
60480	(5,10]	male	no crowding	outside	outside	Hep A
63154	(5,10]	male	no crowding	inside	inside	Hep A
40292	(10,14]	male	crowding	outside	outside	Hep A
61065	(10,14]	male	crowding	outside	outside	Hep A
66230	(2,5]	male	crowding	inside	inside	Hep A
54094	(5,10]	male	no crowding	inside	inside	Hep A
43338	(10,14]	male	no crowding	outside	inside	Hep A
60087	(5,10]	male	no crowding	inside	inside	Hep A
40320	(2,5]	male	no crowding	outside	inside	Hep A
42327	(5,10]	male	crowding	outside	inside	no Hep A
60289	(10,14]	male	no crowding	inside	inside	Hep A
62432	(5,10]	male	crowding	outside	inside	no Hep A
43460	(5,10]	male	crowding	inside	inside	Hep A
63396	(5,10]	male	crowding	inside	inside	Hep A
40377	(5,10]	male	crowding	inside	inside	no Hep A
66274	(10,14]	male	no crowding	inside	inside	Hep A
60093	(10,14]	male	no crowding	inside	inside	Hep A
40314	(18,Inf]	male	no crowding	outside	inside	no Hep A
55516	(5,10]	male	no crowding	outside	inside	Hep A
64058	(5,10]	male	crowding	outside	inside	Hep A
60296	(5,10]	male	no crowding	inside	inside	Hep A
50380	(10,14]	male	no crowding	inside	inside	Hep A
43286	(14,18]	male	crowding	inside	inside	no Hep A
40541	(2,5]	male	crowding	outside	outside	Hep A
60125	(5,10]	male	crowding	outside	outside	Hep A
60075	(18,Inf]	male	no crowding	outside	inside	no Hep A
52315	(2,5]	male	crowding	inside	inside	Hep A
65237	(5,10]	male	crowding	inside	inside	Hep A
50522	(5,10]	male	no crowding	inside	inside	Hep A
66081	(5,10]	male	no crowding	inside	inside	Hep A
66202	(10,14]	male	no crowding	outside	inside	Hep A
41267	(18,Inf]	male	no crowding	inside	inside	no Hep A
63055	(18,Inf]	male	no crowding	inside	inside	no Hep A
63090	(5,10]	male	no crowding	inside	inside	Hep A
60554	(2,5]	male	crowding	outside	outside	Hep A
41152	(2,5]	male	crowding	outside	inside	Hep A
42435	(5,10]	male	crowding	inside	inside	no Hep A
50421	(2,5]	male	no crowding	inside	inside	Hep A
60493	(2,5]	male	crowding	inside	inside	no Hep A
44542	(10,14]	male	crowding	inside	inside	no Hep A
40295	(2,5]	male	crowding	inside	inside	Hep A
61031	(2,5]	male	no crowding	outside	outside	Hep A
47079	(5,10]	male	crowding	outside	inside	Hep A
41137	(5,10]	male	crowding	inside	inside	Hep A
52301	(2,5]	male	crowding	outside	inside	Hep A
41188	(5,10]	male	crowding	outside	inside	Hep A
61047	(5,10]	male	crowding	outside	outside	Hep A
41551	(2,5]	male	no crowding	outside	inside	Hep A
50459	(2,5]	male	crowding	inside	inside	Hep A
50512	(2,5]	male	crowding	outside	inside	Hep A
63118	(10,14]	male	no crowding	outside	outside	Hep A
63557	(5,10]	male	no crowding	inside	inside	Hep A
60534	(5,10]	male	crowding	outside	outside	Hep A
51324	(14,18]	male	no crowding	inside	inside	Hep A
40323	(0,1]	male	crowding	inside	inside	no Hep A
50095	(5,10]	male	crowding	inside	inside	Hep A
62024	(18,Inf]	male	no crowding	inside	inside	Hep A
60216	(18,Inf]	male	crowding	inside	inside	no Hep A
61264	(14,18]	male	no crowding	inside	inside	Hep A
40326	(5,10]	male	no crowding	outside	outside	Hep A
40419	(5,10]	male	crowding	outside	outside	Hep A
43205	(5,10]	male	no crowding	inside	inside	Hep A
40234	(5,10]	male	crowding	inside	inside	Hep A
69144	(5,10]	male	crowding	outside	outside	Hep A
63513	(18,Inf]	male	no crowding	inside	inside	no Hep A
40354	(10,14]	male	crowding	outside	inside	Hep A
45415	(5,10]	male	crowding	inside	inside	Hep A
50041	(5,10]	male	no crowding	inside	inside	Hep A
67291	(10,14]	male	no crowding	outside	outside	Hep A
40258	(14,18]	male	no crowding	outside	inside	Hep A
50319	(5,10]	male	crowding	outside	inside	Hep A
40275	(5,10]	male	no crowding	inside	inside	Hep A
50057	(10,14]	male	no crowding	inside	inside	Hep A
51537	(5,10]	male	no crowding	outside	inside	no Hep A
60483	(5,10]	male	crowding	inside	inside	no Hep A
43431	(14,18]	male	crowding	inside	inside	Hep A
60476	(10,14]	male	no crowding	inside	inside	Hep A
50069	(10,14]	male	crowding	inside	inside	no Hep A
64331	(5,10]	male	crowding	inside	inside	Hep A
47387	(5,10]	male	no crowding	outside	inside	no Hep A
60397	(0,1]	male	no crowding	outside	outside	no Hep A
43413	(2,5]	male	crowding	outside	outside	Hep A
41165	(5,10]	male	no crowding	inside	inside	Hep A
52470	(5,10]	male	crowding	inside	inside	Hep A
60357	(5,10]	male	crowding	inside	inside	Hep A
63398	(10,14]	male	crowding	inside	inside	Hep A
40350	(2,5]	male	crowding	outside	outside	Hep A
43471	(5,10]	male	no crowding	inside	inside	Hep A
50053	(10,14]	male	no crowding	inside	inside	Hep A
50556	(2,5]	male	crowding	outside	inside	Hep A
50379	(5,10]	male	crowding	inside	inside	Hep A
60420	(5,10]	male	no crowding	outside	inside	Hep A
63130	(5,10]	male	no crowding	outside	outside	Hep A
60458	(10,14]	male	no crowding	inside	inside	no Hep A
50442	(1,2]	male	crowding	outside	outside	Hep A
43416	(5,10]	male	no crowding	inside	inside	Hep A
60466	(1,2]	male	no crowding	inside	inside	no Hep A
66181	(5,10]	male	crowding	inside	inside	Hep A
41105	(14,18]	male	no crowding	inside	inside	Hep A
50496	(10,14]	male	crowding	inside	inside	no Hep A
43191	(5,10]	male	no crowding	inside	inside	Hep A
61115	(5,10]	male	crowding	inside	inside	Hep A
61451	(2,5]	male	crowding	outside	outside	Hep A
66448	(2,5]	male	no crowding	inside	inside	Hep A
66255	(2,5]	male	crowding	outside	inside	Hep A
50111	(5,10]	male	no crowding	inside	inside	Hep A
66245	(5,10]	male	no crowding	outside	inside	Hep A
66186	(2,5]	male	crowding	inside	inside	Hep A
43526	(5,10]	male	no crowding	outside	inside	no Hep A
63072	(18,Inf]	male	no crowding	inside	inside	Hep A
43325	(18,Inf]	male	crowding	outside	inside	Hep A
44217	(5,10]	male	crowding	outside	inside	Hep A
60336	(5,10]	male	no crowding	inside	inside	Hep A
51073	(10,14]	male	crowding	outside	inside	Hep A
60268	(2,5]	male	crowding	inside	inside	no Hep A
40012	(5,10]	male	crowding	outside	inside	Hep A
60450	(5,10]	male	crowding	inside	inside	Hep A
40495	(14,18]	male	crowding	outside	inside	no Hep A
66166	(2,5]	male	no crowding	inside	inside	Hep A
40436	(2,5]	male	crowding	outside	outside	no Hep A
66348	(10,14]	male	crowding	inside	inside	no Hep A
40384	(5,10]	male	crowding	inside	inside	no Hep A
51334	(5,10]	male	no crowding	inside	inside	Hep A
40260	(14,18]	male	crowding	outside	inside	no Hep A
43238	(10,14]	male	crowding	inside	inside	Hep A
61078	(10,14]	male	crowding	outside	inside	Hep A
62391	(5,10]	male	no crowding	inside	inside	no Hep A
50403	(5,10]	male	no crowding	inside	inside	no Hep A
40277	(5,10]	male	crowding	inside	inside	Hep A
61035	(2,5]	male	crowding	outside	outside	Hep A
50434	(10,14]	male	crowding	inside	inside	no Hep A
51046	(5,10]	male	no crowding	outside	inside	Hep A
47086	(10,14]	male	no crowding	inside	inside	Hep A
47127	(18,Inf]	male	crowding	outside	inside	no Hep A
66098	(2,5]	male	no crowding	inside	inside	Hep A
43169	(10,14]	male	no crowding	outside	inside	Hep A
63452	(2,5]	male	crowding	inside	inside	no Hep A
66428	(2,5]	male	crowding	inside	inside	no Hep A
66183	(2,5]	male	crowding	inside	inside	Hep A
62243	(2,5]	male	no crowding	inside	inside	Hep A
60399	(2,5]	male	no crowding	outside	outside	Hep A
44366	(2,5]	male	crowding	outside	inside	no Hep A
40548	(5,10]	male	no crowding	inside	inside	Hep A
41064	(18,Inf]	male	crowding	inside	inside	no Hep A
66156	(5,10]	male	no crowding	inside	inside	Hep A
47411	(5,10]	male	no crowding	outside	outside	Hep A
50001	(2,5]	male	crowding	outside	inside	Hep A
60545	(2,5]	male	no crowding	inside	inside	no Hep A
63203	(5,10]	male	crowding	inside	inside	Hep A
50333	(5,10]	male	crowding	outside	outside	no Hep A
40491	(5,10]	male	crowding	outside	inside	Hep A
